# Supplementary material for: Mind the GAP: quantifying the breakdown of the linear vibronic coupling Hamiltonian
Source: Royal Society of Chemistry journal article supplement (doi:10.1039/d2cp05576g), 2023-01-01
Supplement: d2cp05576g1.pdf [file d2cp05576g1.pdf]

# Mind the GAP: Quantifying the Breakdown of the Linear Vibronic Coupling Hamiltonian

## Supplementary Information

Thomas J. Penfold, Julien Eng

### Contents

|                                                  |           |
|--------------------------------------------------|-----------|
| <b>S1 TBPe</b>                                   | <b>3</b>  |
| S1-1 Geometry . . . . .                          | 3         |
| S1-2 Electronic Structure . . . . .              | 6         |
| S1-3 LVC parameters . . . . .                    | 7         |
| <b>S2 TAT-3DBTO2</b>                             | <b>24</b> |
| S2-1 Geometry . . . . .                          | 24        |
| S2-2 Electronic Structure . . . . .              | 29        |
| S2-3 LVC parameters . . . . .                    | 30        |
| <b>S3 Maleimide</b>                              | <b>46</b> |
| S3-1 Geometry . . . . .                          | 46        |
| S3-2 Electronic Structure . . . . .              | 46        |
| S3-3 LVC parameters . . . . .                    | 49        |
| S3-4 Excited-states Dynamics . . . . .           | 53        |
| S3-4.1 6-modes Hamiltonian parameters . . . . .  | 54        |
| S3-4.2 12-modes Hamiltonian parameters . . . . . | 54        |

### List of Tables

|                                                                                                            |    |
|------------------------------------------------------------------------------------------------------------|----|
| S1 Cartesian coordinates of the GS Minimum of TBPe. . . . .                                                | 3  |
| S2 Cartesian coordinates of the S1 Minimum of TBPe. . . . .                                                | 3  |
| S3 Cartesian coordinates of the S1 LVC minimum of TBPe. . . . .                                            | 4  |
| S4 Cartesian coordinates of the T1 Minimum of TBPe. . . . .                                                | 5  |
| S5 Cartesian coordinates of the T1 LVC Minimum of TBPe. . . . .                                            | 5  |
| S6 LVC Analysis for S1 of TBPe. . . . .                                                                    | 7  |
| S7 LVC Analysis for T1 of TBPe. . . . .                                                                    | 12 |
| S8 LVC Analysis for T2 of TBPe. . . . .                                                                    | 17 |
| S9 Cartesian coordinates of the GS Minimum of TAT-3DBTO <sub>2</sub> . . . . .                             | 24 |
| S10 Cartesian coordinates of the S <sub>1</sub> C <sub>3</sub> Minimum of TAT-3DBTO <sub>2</sub> . . . . . | 25 |
| S11 Cartesian coordinates of the S <sub>1</sub> C <sub>1</sub> Minimum of TAT-3DBTO <sub>2</sub> . . . . . | 25 |
| S12 Cartesian coordinates of the S <sub>1</sub> LVC Minimum of TAT-3DBTO <sub>2</sub> . . . . .            | 26 |
| S13 Cartesian coordinates of the T <sub>1</sub> Minimum of TAT-3DBTO <sub>2</sub> . . . . .                | 27 |
| S14 Rotation coordinates $\varphi$ of TAT-3DBTO <sub>2</sub> . . . . .                                     | 28 |
| S15 LVC Analysis for S1 of TAT-3DBTO <sub>2</sub> . . . . .                                                | 30 |
| S16 LVC Analysis for T1 of TAT-3DBTO <sub>2</sub> . . . . .                                                | 37 |
| S17 Cartesian coordinates different minima of Maleimide. . . . .                                           | 46 |
| S18 Cartesian coordinates different minima of Maleimide. . . . .                                           | 46 |

|     |                                                                                                                                                                                                                                                 |    |
|-----|-------------------------------------------------------------------------------------------------------------------------------------------------------------------------------------------------------------------------------------------------|----|
| S19 | Electronic structure at the ground state optimised geometry. GS stands for the ground state electronic structure: $(\pi_1)^2(\pi_2)^2(n_1)^2(n_2)^2(\pi^*)^0$ . Molecular orbitals are shown in figure S5. . . . .                              | 46 |
| S20 | Electronic structure at the excited states optimised geometries. GS stands for the ground state electronic structure: $(\pi_1)^2(\pi_2)^2(n_1)^2(n_2)^2(\pi^*)^0$ . Molecular orbitals are shown in figure S5. . . . .                          | 47 |
| S21 | LVC Analysis for S1 of Maleimide. . . . .                                                                                                                                                                                                       | 49 |
| S22 | LVC Analysis for S2 of Maleimide. . . . .                                                                                                                                                                                                       | 49 |
| S23 | LVC Analysis for S3 of Maleimide. . . . .                                                                                                                                                                                                       | 50 |
| S24 | LVC Analysis for S4 of Maleimide. . . . .                                                                                                                                                                                                       | 51 |
| S25 | Intrastate coupling parameters for the 6-modes model Hamiltonian. Frequencies are given in $\text{cm}^{-1}$ and couplings in eV. . . . .                                                                                                        | 54 |
| S26 | Intrastate coupling parameters for the 6-modes model Hamiltonian. Frequencies are given in $\text{cm}^{-1}$ and couplings in eV. . . . .                                                                                                        | 54 |
| S27 | Computational details of the 6-modes MCTDH propagations with wavepackets with an initial wavepacket in ${}^1B_2$ or ${}^2B_2$ . The number of primitive basis and Single Particule Functions are given for each set of combined modes. . . . .  | 54 |
| S28 | Intrastate coupling parameters for the 12-modes model Hamiltonian. Frequencies are given in $\text{cm}^{-1}$ and couplings in eV. . . . .                                                                                                       | 55 |
| S29 | Intrastate coupling parameters for the 12-modes model Hamiltonian. Frequencies are given in $\text{cm}^{-1}$ and couplings in eV. . . . .                                                                                                       | 55 |
| S30 | Computational details of the 12-modes MCTDH propagations with wavepackets with an initial wavepacket in ${}^1B_2$ or ${}^2B_2$ . The number of primitive basis and Single Particule Functions are given for each set of combined modes. . . . . | 55 |

## List of Figures

|    |                                                                                                                                                                                                                                                                                              |    |
|----|----------------------------------------------------------------------------------------------------------------------------------------------------------------------------------------------------------------------------------------------------------------------------------------------|----|
| S1 | Difference of electronic density associated to the $T_1 \leftarrow \text{GS}$ (left), $S_1 \leftarrow \text{GS}$ (centre) and $T_2 \leftarrow \text{GS}$ (right) for <b>TBPe</b> . . . . .                                                                                                   | 6  |
| S2 | Definition of the Donor-Acceptor torsion angle $\varphi$ . $\vec{n}_A$ and $\vec{n}_B$ are the normal vectors to the donor and acceptor units, respectively. . . . .                                                                                                                         | 29 |
| S3 | Difference of electronic density associated to the $T_1 \leftarrow \text{GS}$ (top) and $S_1 \leftarrow \text{GS}$ (bottom) at the ground state optimised geometry (left) the $S_1$ minimum (centre) and the $T_1$ minimum (right). Purple: loss of electronic density. Green: gain. . . . . | 29 |
| S4 | RSMA for all the normal modes of <b>TAT-3DBTO</b> <sub>2</sub> for $S_1$ and $T_1$ as a function of their index. The range of frequencies mentioned in the main text are emphasized in colours. . . . .                                                                                      | 45 |
| S5 | Orbitals involved in the four lowest excited singlet states of <b>Maleimide</b> . . . . .                                                                                                                                                                                                    | 47 |
| S6 | EOM-CCSD Path between Franck-Condon and the minimum of each of the four lowest excited states. . . . .                                                                                                                                                                                       | 48 |
| S7 | Comparison between the computed adiabatic (full lines) and LVC diabatic (dashed lines) PES along $a_1$ normal modes. . . . .                                                                                                                                                                 | 52 |
| S8 | Schematic representation of the coupling selection rules at the $C_{2v}$ ground state minimum of <b>Maleimide</b> . Arrows represent possible vibronic coupling and lowercase irreps correspond to the irreps of the normal modes that enable the coupling. . . . .                          | 53 |
| S9 | Population kinetics of the lowest excited singlet states of <b>Maleimide</b> using a model Hamiltonian along 12 (full lines) and 6 (dashed lines) normal modes. The initial wavepacket is position at $Q_0$ in $S_4$ . . . . .                                                               | 53 |

## S1 TBPe

### S1-1 Geometry

**Table S1:** Cartesian coordinates of the GS Minimum of TBPe.

| At | x       | y       | z      | At | x       | y       | z       | At | x       | y       | z       |
|----|---------|---------|--------|----|---------|---------|---------|----|---------|---------|---------|
| C  | 0.7331  | -1.2408 | 0.0089 | H  | -0.9613 | 3.3572  | -0.0009 | H  | 5.5821  | 4.6136  | 0.0110  |
| C  | -0.7358 | -1.2416 | 0.0101 | C  | 3.5973  | -3.7721 | 0.0097  | H  | 5.4668  | 3.0915  | -0.8728 |
| C  | -1.4247 | 0.0012  | 0.0069 | C  | -3.5970 | -3.7761 | 0.0187  | C  | -5.1198 | 3.6210  | -0.0040 |
| C  | -0.7372 | 1.2446  | 0.0043 | C  | 3.5933  | 3.7796  | 0.0058  | C  | -3.1982 | 4.5637  | -1.2545 |
| C  | 0.7317  | 1.2453  | 0.0057 | C  | -3.6018 | 3.7757  | -0.0027 | C  | -3.2006 | 4.5682  | 1.2471  |
| C  | 1.4205  | 0.0026  | 0.0079 | C  | 3.1959  | -4.5621 | -1.2415 | H  | -5.4701 | 3.0841  | -0.8891 |
| C  | 2.8371  | 0.0033  | 0.0086 | C  | 3.1939  | -4.5626 | 1.2600  | H  | -5.5917 | 4.6070  | -0.0074 |
| C  | 3.5375  | 1.2291  | 0.0082 | C  | 5.1154  | -3.6176 | 0.0111  | H  | -5.4723 | 3.0892  | 0.8833  |
| C  | 2.8793  | 2.4326  | 0.0066 | H  | 2.1180  | -4.7461 | 1.2962  | H  | -3.4800 | 4.0301  | 2.1562  |
| C  | 1.4715  | 2.4085  | 0.0051 | H  | 3.4717  | -4.0232 | 2.1688  | H  | -3.7037 | 5.5392  | 1.2560  |
| C  | 3.5387  | -1.2217 | 0.0095 | H  | 3.6970  | -5.5336 | 1.2713  | H  | -2.1247 | 4.7515  | 1.2848  |
| C  | 2.8817  | -2.4260 | 0.0093 | H  | 2.1200  | -4.7448 | -1.2798 | H  | -3.4765 | 4.0228  | -2.1623 |
| C  | 1.4739  | -2.4033 | 0.0087 | H  | 3.6984  | -5.5334 | -1.2521 | H  | -2.1222 | 4.7466  | -1.2912 |
| H  | 0.9569  | -3.3534 | 0.0084 | H  | 3.4759  | -4.0226 | -2.1497 | H  | -3.7008 | 5.5350  | -1.2675 |
| H  | 4.6214  | -1.1774 | 0.0102 | H  | 5.4677  | -3.0835 | -0.8749 | C  | -5.1153 | -3.6234 | 0.0213  |
| H  | 4.6202  | 1.1858  | 0.0093 | H  | 5.5872  | -4.6036 | 0.0118  | C  | -3.1915 | -4.5638 | 1.2701  |
| H  | 0.9536  | 3.3581  | 0.0032 | H  | 5.4659  | -3.0830 | 0.8975  | C  | -3.1957 | -4.5679 | -1.2315 |
| C  | -2.8412 | 0.0003  | 0.0071 | C  | 5.1115  | 3.6269  | 0.0112  | H  | -3.4694 | -4.0233 | 2.1782  |
| C  | -3.5430 | 1.2253  | 0.0038 | C  | 3.1860  | 4.5725  | 1.2534  | H  | -2.1154 | -4.7459 | 1.3058  |
| C  | -2.8860 | 2.4296  | 0.0006 | C  | 3.1938  | 4.5662  | -1.2481 | H  | -3.6933 | -5.5355 | 1.2834  |
| C  | -1.4782 | 2.4070  | 0.0011 | H  | 3.4621  | 4.0354  | 2.1641  | H  | -3.4765 | -4.0301 | -2.1403 |
| C  | -1.4753 | -2.4049 | 0.0141 | H  | 2.1099  | 4.7551  | 1.2866  | H  | -3.6975 | -5.5396 | -1.2402 |
| C  | -2.8831 | -2.4291 | 0.0147 | H  | 3.6882  | 5.5439  | 1.2637  | H  | -2.1196 | -4.7497 | -1.2700 |
| C  | -3.5415 | -1.2256 | 0.0109 | H  | 3.4765  | 4.0249  | -2.1544 | H  | -5.4653 | -3.0862 | 0.9063  |
| H  | -0.9572 | -3.3544 | 0.0175 | H  | 3.6952  | 5.5381  | -1.2599 | H  | -5.5858 | -4.6101 | 0.0260  |
| H  | -4.6242 | -1.1824 | 0.0110 | H  | 2.1177  | 4.7474  | -1.2892 | H  | -5.4694 | -3.0929 | -0.8660 |
| H  | -4.6256 | 1.1808  | 0.0038 | H  | 5.4605  | 3.0946  | 0.8996  |    |         |         |         |

**Table S2:** Cartesian coordinates of the S1 Minimum of TBPe.

| At | x       | y       | z      | At | x       | y       | z       | At | x       | y      | z       |
|----|---------|---------|--------|----|---------|---------|---------|----|---------|--------|---------|
| C  | 0.7185  | -1.2373 | 0.0051 | H  | -0.9480 | 3.3785  | -0.0045 | H  | 5.5908  | 4.5956 | 0.0161  |
| C  | -0.7211 | -1.2381 | 0.0044 | C  | 3.5959  | -3.7805 | 0.0168  | H  | 5.4607  | 3.0745 | -0.8667 |
| C  | -1.4114 | 0.0010  | 0.0036 | C  | -3.5955 | -3.7846 | 0.0148  | C  | -5.1161 | 3.6088 | 0.0078  |
| C  | -0.7225 | 1.2408  | 0.0005 | C  | 3.5914  | 3.7882  | 0.0027  | C  | -3.2147 | 4.5741 | -1.2565 |
| C  | 0.7171  | 1.2416  | 0.0008 | C  | -3.6000 | 3.7840  | -0.0004 | C  | -3.2029 | 4.5848 | 1.2453  |
| C  | 1.4074  | 0.0025  | 0.0040 | C  | 3.2159  | -4.5729 | -1.2394 | H  | -5.4656 | 3.0676 | -0.8750 |
| C  | 2.8245  | 0.0033  | 0.0072 | C  | 3.1937  | -4.5790 | 1.2624  | H  | -5.6004 | 4.5887 | 0.0071  |
| C  | 3.5193  | 1.2299  | 0.0070 | C  | 5.1120  | -3.6052 | 0.0314  | H  | -5.4564 | 3.0734 | 0.8977  |

Continued on next page

— Continued from previous page

| At | x       | y       | z       | At | x      | y       | z       | At | x       | y       | z       |
|----|---------|---------|---------|----|--------|---------|---------|----|---------|---------|---------|
| C  | 2.8568  | 2.4504  | 0.0035  | H  | 2.1201 | -4.7759 | 1.2888  | H  | -3.4690 | 4.0448  | 2.1573  |
| C  | 1.4651  | 2.4346  | -0.0001 | H  | 3.4566 | -4.0376 | 2.1745  | H  | -3.7203 | 5.5485  | 1.2552  |
| C  | 3.5206  | -1.2225 | 0.0116  | H  | 3.7106 | -5.5428 | 1.2758  | H  | -2.1295 | 4.7820  | 1.2754  |
| C  | 2.8595  | -2.4436 | 0.0126  | H  | 2.1428 | -4.7692 | -1.2850 | H  | -3.4901 | 4.0265  | -2.1612 |
| C  | 1.4677  | -2.4295 | 0.0087  | H  | 3.7332 | -5.5367 | -1.2488 | H  | -2.1414 | 4.7700  | -1.2984 |
| H  | 0.9439  | -3.3750 | 0.0095  | H  | 3.4946 | -4.0267 | -2.1439 | H  | -3.7315 | 5.5381  | -1.2695 |
| H  | 4.6033  | -1.1825 | 0.0145  | H  | 5.4658 | -3.0675 | -0.8518 | C  | -5.1117 | -3.6112 | 0.0401  |
| H  | 4.6020  | 1.1912  | 0.0100  | H  | 5.5963 | -4.5851 | 0.0368  | C  | -3.1848 | -4.5886 | 1.2541  |
| H  | 0.9401  | 3.3795  | -0.0033 | H  | 5.4480 | -3.0663 | 0.9209  | C  | -3.2223 | -4.5705 | -1.2475 |
| C  | -2.8285 | 0.0002  | 0.0065  | C  | 5.1078 | 3.6150  | 0.0152  | H  | -3.4423 | -4.0518 | 2.1705  |
| C  | -3.5247 | 1.2260  | 0.0055  | C  | 3.1901 | 4.5894  | 1.2468  | H  | -2.1110 | -4.7853 | 1.2730  |
| C  | -2.8636 | 2.4472  | 0.0015  | C  | 3.2084 | 4.5768  | -1.2549 | H  | -3.7011 | -5.5528 | 1.2661  |
| C  | -1.4718 | 2.4330  | -0.0012 | H  | 3.4544 | 4.0503  | 2.1599  | H  | -3.5075 | -4.0203 | -2.1476 |
| C  | -1.4691 | -2.4311 | 0.0069  | H  | 2.1164 | 4.7855  | 1.2739  | H  | -3.7380 | -5.5351 | -1.2583 |
| C  | -2.8608 | -2.4469 | 0.0118  | H  | 3.7063 | 5.5536  | 1.2573  | H  | -2.1492 | -4.7646 | -1.3007 |
| C  | -3.5233 | -1.2264 | 0.0114  | H  | 3.4867 | 4.0288  | -2.1585 | H  | -5.4421 | -3.0746 | 0.9331  |
| H  | -0.9441 | -3.3760 | 0.0048  | H  | 3.7241 | 5.5414  | -1.2675 | H  | -5.5948 | -4.5918 | 0.0467  |
| H  | -4.6060 | -1.1877 | 0.0151  | H  | 2.1350 | 4.7714  | -1.2997 | H  | -5.4726 | -3.0721 | -0.8394 |
| H  | -4.6073 | 1.1860  | 0.0082  | H  | 5.4462 | 3.0798  | 0.9060  |    |         |         |         |

**Table S3:** Cartesian coordinates of the S1 LVC minimum of TBPe.

| At | x       | y       | z      | At | x       | y       | z       | At | x       | y       | z       |
|----|---------|---------|--------|----|---------|---------|---------|----|---------|---------|---------|
| C  | 0.7162  | -1.2370 | 0.0097 | H  | -0.9481 | 3.3787  | 0.0013  | H  | 5.5886  | 4.5961  | 0.0074  |
| C  | -0.7191 | -1.2377 | 0.0097 | C  | 3.5933  | -3.7813 | 0.0133  | H  | 5.4539  | 3.0759  | -0.8766 |
| C  | -1.4089 | 0.0011  | 0.0079 | C  | -3.5930 | -3.7851 | 0.0146  | C  | -5.1138 | 3.6095  | -0.0021 |
| C  | -0.7203 | 1.2406  | 0.0056 | C  | 3.5888  | 3.7887  | 0.0029  | C  | -3.2046 | 4.5789  | -1.2513 |
| C  | 0.7149  | 1.2413  | 0.0055 | C  | -3.5974 | 3.7848  | 0.0001  | C  | -3.2084 | 4.5822  | 1.2505  |
| C  | 1.4047  | 0.0025  | 0.0075 | C  | 3.2002  | -4.5801 | -1.2350 | H  | -5.4571 | 3.0690  | -0.8878 |
| C  | 2.8234  | 0.0031  | 0.0078 | C  | 3.2052  | -4.5740 | 1.2670  | H  | -5.5983 | 4.5894  | -0.0053 |
| C  | 3.5179  | 1.2292  | 0.0064 | C  | 5.1097  | -3.6056 | 0.0097  | H  | -5.4604 | 3.0732  | 0.8849  |
| C  | 2.8539  | 2.4507  | 0.0046 | H  | 2.1318  | -4.7707 | 1.3056  | H  | -3.4802 | 4.0395  | 2.1593  |
| C  | 1.4652  | 2.4345  | 0.0039 | H  | 3.4778  | -4.0279 | 2.1735  | H  | -3.7260 | 5.5460  | 1.2600  |
| C  | 3.5190  | -1.2222 | 0.0096 | H  | 3.7226  | -5.5378 | 1.2797  | H  | -2.1350 | 4.7791  | 1.2876  |
| C  | 2.8563  | -2.4443 | 0.0115 | H  | 2.1269  | -4.7777 | -1.2682 | H  | -3.4737 | 4.0337  | -2.1594 |
| C  | 1.4676  | -2.4297 | 0.0119 | H  | 3.7183  | -5.5435 | -1.2452 | H  | -2.1312 | 4.7759  | -1.2857 |
| H  | 0.9438  | -3.3752 | 0.0134 | H  | 3.4686  | -4.0380 | -2.1452 | H  | -3.7222 | 5.5426  | -1.2648 |
| H  | 4.6015  | -1.1829 | 0.0094 | H  | 5.4525  | -3.0686 | -0.8783 | C  | -5.1096 | -3.6118 | 0.0177  |
| H  | 4.6005  | 1.1908  | 0.0070 | H  | 5.5944  | -4.5854 | 0.0103  | C  | -3.1985 | -4.5798 | 1.2651  |
| H  | 0.9405  | 3.3794  | 0.0024 | H  | 5.4566  | -3.0658 | 0.8944  | C  | -3.2034 | -4.5809 | -1.2367 |
| C  | -2.8276 | 0.0004  | 0.0081 | C  | 5.1054  | 3.6155  | 0.0077  | H  | -3.4681 | -4.0360 | 2.1739  |
| C  | -3.5233 | 1.2257  | 0.0057 | C  | 3.1935  | 4.5876  | 1.2504  | H  | -2.1248 | -4.7752 | 1.2990  |
| C  | -2.8605 | 2.4477  | 0.0031 | C  | 3.2001  | 4.5803  | -1.2513 | H  | -3.7146 | -5.5443 | 1.2778  |
| C  | -1.4718 | 2.4331  | 0.0033 | H  | 3.4620  | 4.0468  | 2.1613  | H  | -3.4760 | -4.0375 | -2.1448 |

Continued on next page

— Continued from previous page

| At | x       | y       | z      | At | x      | y      | z       | At | x       | y       | z       |
|----|---------|---------|--------|----|--------|--------|---------|----|---------|---------|---------|
| C  | -1.4692 | -2.4309 | 0.0115 | H  | 2.1198 | 4.7836 | 1.2827  | H  | -3.7200 | -5.5451 | -1.2469 |
| C  | -2.8579 | -2.4471 | 0.0122 | H  | 3.7099 | 5.5519 | 1.2605  | H  | -2.1299 | -4.7766 | -1.2741 |
| C  | -3.5220 | -1.2257 | 0.0105 | H  | 3.4738 | 4.0340 | -2.1575 | H  | -5.4532 | -3.0724 | 0.9040  |
| H  | -0.9446 | -3.3759 | 0.0128 | H  | 3.7163 | 5.5447 | -1.2643 | H  | -5.5927 | -4.5924 | 0.0204  |
| H  | -4.6046 | -1.1874 | 0.0109 | H  | 2.1265 | 4.7754 | -1.2904 | H  | -5.4574 | -3.0753 | -0.8688 |
| H  | -4.6059 | 1.1863  | 0.0058 | H  | 5.4484 | 3.0792 | 0.8962  |    |         |         |         |

**Table S4:** Cartesian coordinates of the T1 Minimum of TBPe.

| At | x       | y       | z       | At | x       | y       | z       | At | x       | y       | z       |
|----|---------|---------|---------|----|---------|---------|---------|----|---------|---------|---------|
| C  | 0.7116  | -1.2395 | -0.0006 | H  | -0.9481 | 3.3843  | -0.0009 | H  | 5.6085  | 4.5746  | 0.0061  |
| C  | -0.7134 | -1.2383 | -0.0005 | C  | 3.5963  | -3.7887 | -0.0006 | H  | 5.4633  | 3.0572  | -0.8801 |
| C  | -1.4015 | 0.0011  | -0.0005 | C  | -3.6031 | -3.7823 | 0.0009  | C  | -5.1118 | 3.6069  | -0.0023 |
| C  | -0.7113 | 1.2393  | -0.0006 | C  | 3.6033  | 3.7820  | 0.0011  | C  | -3.2083 | 4.5866  | -1.2508 |
| C  | 0.7138  | 1.2382  | -0.0003 | C  | -3.5961 | 3.7884  | -0.0009 | C  | -3.2104 | 4.5854  | 1.2505  |
| C  | 1.4019  | -0.0013 | -0.0003 | C  | 3.2104  | -4.5855 | -1.2520 | H  | -5.4543 | 3.0677  | -0.8891 |
| C  | 2.8224  | -0.0026 | 0.0002  | C  | 3.2086  | -4.5870 | 1.2493  | H  | -5.5997 | 4.5851  | -0.0027 |
| C  | 3.5199  | 1.2198  | 0.0008  | C  | 5.1120  | -3.6072 | 0.0006  | H  | -5.4561 | 3.0676  | 0.8837  |
| C  | 2.8585  | 2.4480  | 0.0008  | H  | 2.1363  | -4.7894 | 1.2838  | H  | -3.4785 | 4.0398  | 2.1587  |
| C  | 1.4765  | 2.4367  | 0.0000  | H  | 3.4753  | -4.0424 | 2.1585  | H  | -3.7324 | 5.5465  | 1.2624  |
| C  | 3.5177  | -1.2262 | 0.0002  | H  | 3.7307  | -5.5481 | 1.2610  | H  | -2.1381 | 4.7877  | 1.2868  |
| C  | 2.8542  | -2.4533 | -0.0004 | H  | 2.1381  | -4.7878 | -1.2882 | H  | -3.4749 | 4.0421  | -2.1600 |
| C  | 1.4722  | -2.4395 | -0.0008 | H  | 3.7323  | -5.5467 | -1.2640 | H  | -2.1360 | 4.7891  | -1.2852 |
| H  | 0.9483  | -3.3845 | -0.0014 | H  | 3.4785  | -4.0399 | -2.1601 | H  | -3.7303 | 5.5478  | -1.2625 |
| H  | 4.6000  | -1.1853 | 0.0006  | H  | 5.4561  | -3.0675 | -0.8852 | C  | -5.1184 | -3.5976 | 0.0046  |
| H  | 4.6020  | 1.1770  | 0.0013  | H  | 5.5998  | -4.5854 | 0.0006  | C  | -3.2152 | -4.5820 | 1.2498  |
| H  | 0.9544  | 3.3828  | -0.0002 | H  | 5.4547  | -3.0684 | 0.8875  | C  | -3.2207 | -4.5792 | -1.2515 |
| C  | -2.8221 | 0.0023  | -0.0003 | C  | 5.1187  | 3.5975  | 0.0052  | H  | -3.4798 | -4.0375 | 2.1597  |
| C  | -3.5175 | 1.2259  | -0.0005 | C  | 3.2152  | 4.5819  | 1.2499  | H  | -2.1432 | -4.7864 | 1.2828  |
| C  | -2.8539 | 2.4531  | -0.0008 | C  | 3.2211  | 4.5788  | -1.2514 | H  | -3.7389 | -5.5422 | 1.2615  |
| C  | -1.4720 | 2.4393  | -0.0008 | H  | 3.4796  | 4.0376  | 2.1599  | H  | -3.4891 | -4.0327 | -2.1590 |
| C  | -1.4762 | -2.4370 | -0.0001 | H  | 2.1432  | 4.7864  | 1.2826  | H  | -3.7444 | -5.5394 | -1.2631 |
| C  | -2.8581 | -2.4483 | 0.0004  | H  | 3.7389  | 5.5421  | 1.2615  | H  | -2.1488 | -4.7834 | -1.2895 |
| C  | -3.5195 | -1.2201 | 0.0002  | H  | 3.4899  | 4.0321  | -2.1587 | H  | -5.4584 | -3.0578 | 0.8919  |
| H  | -0.9539 | -3.3830 | 0.0001  | H  | 3.7448  | 5.5390  | -1.2631 | H  | -5.6082 | -4.5747 | 0.0055  |
| H  | -4.6017 | -1.1774 | 0.0004  | H  | 2.1493  | 4.7828  | -1.2897 | H  | -5.4628 | -3.0574 | -0.8809 |
| H  | -4.5997 | 1.1851  | -0.0004 | H  | 5.4585  | 3.0579  | 0.8927  |    |         |         |         |

**Table S5:** Cartesian coordinates of the T1 LVC Minimum of TBPe.

| At | x       | y       | z      | At | x       | y       | z      | At | x       | y      | z       |
|----|---------|---------|--------|----|---------|---------|--------|----|---------|--------|---------|
| C  | 0.7091  | -1.2368 | 0.0100 | H  | -0.9544 | 3.3834  | 0.0015 | H  | 5.5940  | 4.5887 | 0.0082  |
| C  | -0.7120 | -1.2374 | 0.0097 | C  | 3.5955  | -3.7818 | 0.0136 | H  | 5.4542  | 3.0694 | -0.8760 |
| C  | -1.4017 | 0.0011  | 0.0081 | C  | -3.5951 | -3.7856 | 0.0140 | C  | -5.1154 | 3.6040 | -0.0023 |

Continued on next page

— Continued from previous page

| At | x       | y       | z      | At | x       | y       | z       | At | x       | y       | z       |
|----|---------|---------|--------|----|---------|---------|---------|----|---------|---------|---------|
| C  | -0.7133 | 1.2403  | 0.0058 | C  | 3.5909  | 3.7892  | 0.0029  | C  | -3.2105 | 4.5816  | -1.2508 |
| C  | 0.7079  | 1.2409  | 0.0055 | C  | -3.5994 | 3.7854  | 0.0002  | C  | -3.2148 | 4.5850  | 1.2504  |
| C  | 1.3975  | 0.0025  | 0.0075 | C  | 3.2044  | -4.5844 | -1.2326 | H  | -5.4569 | 3.0625  | -0.8881 |
| C  | 2.8187  | 0.0031  | 0.0076 | C  | 3.2139  | -4.5752 | 1.2687  | H  | -5.6036 | 4.5822  | -0.0057 |
| C  | 3.5143  | 1.2266  | 0.0061 | C  | 5.1114  | -3.5999 | 0.0070  | H  | -5.4607 | 3.0668  | 0.8847  |
| C  | 2.8500  | 2.4528  | 0.0044 | H  | 2.1415  | -4.7770 | 1.3092  | H  | -3.4839 | 4.0412  | 2.1594  |
| C  | 1.4696  | 2.4386  | 0.0039 | H  | 3.4854  | -4.0269 | 2.1743  | H  | -3.7368 | 5.5464  | 1.2598  |
| C  | 3.5155  | -1.2197 | 0.0092 | H  | 3.7357  | -5.5367 | 1.2818  | H  | -2.1423 | 4.7872  | 1.2872  |
| C  | 2.8524  | -2.4465 | 0.0117 | H  | 2.1319  | -4.7878 | -1.2632 | H  | -3.4763 | 4.0353  | -2.1593 |
| C  | 1.4720  | -2.4338 | 0.0127 | H  | 3.7272  | -5.5453 | -1.2429 | H  | -2.1379 | 4.7840  | -1.2845 |
| H  | 0.9501  | -3.3799 | 0.0150 | H  | 3.4679  | -4.0422 | -2.1443 | H  | -3.7325 | 5.5429  | -1.2647 |
| H  | 4.5976  | -1.1780 | 0.0086 | H  | 5.4507  | -3.0623 | -0.8821 | C  | -5.1113 | -3.6062 | 0.0175  |
| H  | 4.5965  | 1.1859  | 0.0066 | H  | 5.6000  | -4.5778 | 0.0072  | C  | -3.2045 | -4.5830 | 1.2637  |
| H  | 0.9468  | 3.3842  | 0.0025 | H  | 5.4585  | -3.0585 | 0.8906  | C  | -3.2100 | -4.5831 | -1.2374 |
| C  | -2.8230 | 0.0004  | 0.0083 | C  | 5.1071  | 3.6099  | 0.0082  | H  | -3.4709 | -4.0386 | 2.1731  |
| C  | -3.5198 | 1.2231  | 0.0060 | C  | 3.1993  | 4.5905  | 1.2499  | H  | -2.1316 | -4.7838 | 1.2969  |
| C  | -2.8567 | 2.4499  | 0.0034 | C  | 3.2066  | 4.5829  | -1.2512 | H  | -3.7250 | -5.5452 | 1.2763  |
| C  | -1.4762 | 2.4373  | 0.0036 | H  | 3.4647  | 4.0487  | 2.1612  | H  | -3.4798 | -4.0382 | -2.1456 |
| C  | -1.4736 | -2.4351 | 0.0111 | H  | 2.1265  | 4.7917  | 1.2815  | H  | -3.7312 | -5.5450 | -1.2481 |
| C  | -2.8541 | -2.4492 | 0.0119 | H  | 3.7201  | 5.5525  | 1.2601  | H  | -2.1374 | -4.7843 | -1.2747 |
| C  | -3.5185 | -1.2231 | 0.0105 | H  | 3.4774  | 4.0354  | -2.1575 | H  | -5.4530 | -3.0660 | 0.9040  |
| H  | -0.9509 | -3.3807 | 0.0119 | H  | 3.7274  | 5.5449  | -1.2643 | H  | -5.5982 | -4.5850 | 0.0201  |
| H  | -4.6007 | -1.1825 | 0.0110 | H  | 2.1339  | 4.7834  | -1.2900 | H  | -5.4577 | -3.0685 | -0.8687 |
| H  | -4.6020 | 1.1814  | 0.0061 | H  | 5.4480  | 3.0724  | 0.8967  |    |         |         |         |

## S1-2 Electronic Structure

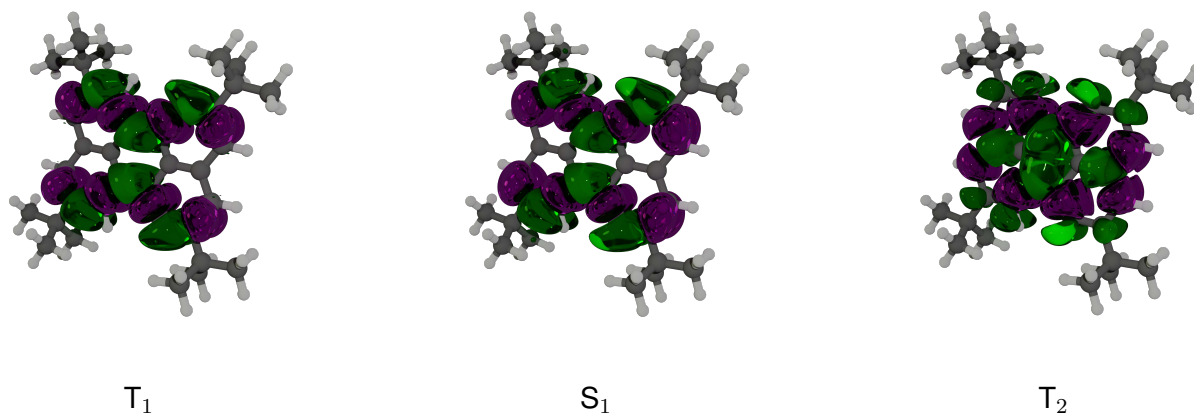

**Figure S1:** Difference of electronic density associated to the  $T_1 \leftarrow GS$  (left),  $S_1 \leftarrow GS$  (centre) and  $T_2 \leftarrow GS$  (right) for **TBPe**.

## S1-3 LVC parameters

Table S6: LVC Analysis for S1 of TBPe.

| $\alpha$ | Freq. /cm <sup>-1</sup> | $\kappa_\alpha$       |          |        | $\kappa_\alpha^*$     |          |        | $\xi$  |
|----------|-------------------------|-----------------------|----------|--------|-----------------------|----------|--------|--------|
|          |                         | $\kappa_\alpha$ / meV | dE / meV | dQ     | $\kappa_\alpha$ / meV | dE / meV | dQ     |        |
| 1        | 19.71                   | 0.102                 | 0.000    | -0.042 | -0.268                | -0.001   | 0.110  | 0.001  |
| 2        | 25.22                   | 0.103                 | 0.000    | -0.033 | 1.261                 | -0.009   | -0.403 | -0.002 |
| 3        | 29.15                   | -0.108                | 0.000    | 0.030  | 0.540                 | -0.001   | -0.149 | -0.002 |
| 4        | 30.92                   | -0.042                | 0.000    | 0.011  | -0.422                | -0.001   | 0.110  | 0.001  |
| 5        | 31.41                   | -0.040                | 0.000    | 0.010  | 1.404                 | -0.009   | -0.361 | 0.001  |
| 6        | 48.26                   | -0.029                | 0.000    | 0.005  | -0.175                | 0.000    | 0.029  | 0.000  |
| 7        | 72.92                   | -0.043                | 0.000    | 0.005  | -2.508                | -0.013   | 0.277  | 0.000  |
| 8        | 80.77                   | -0.043                | 0.000    | 0.004  | -2.378                | -0.010   | 0.237  | 0.000  |
| 9        | 91.43                   | 1.131                 | -0.002   | -0.100 | -3.244                | -0.017   | 0.286  | 0.009  |
| 10       | 94.40                   | 0.045                 | 0.000    | -0.004 | 4.434                 | -0.031   | -0.379 | 0.000  |
| 11       | 115.51                  | -0.001                | 0.000    | 0.000  | -2.061                | -0.005   | 0.144  | 0.000  |
| 12       | 122.18                  | -0.223                | 0.000    | 0.015  | -2.893                | -0.010   | 0.191  | 0.000  |
| 13       | 122.91                  | -0.076                | 0.000    | 0.005  | -2.919                | -0.010   | 0.192  | -0.001 |
| 14       | 153.00                  | -0.142                | 0.000    | 0.007  | -0.202                | 0.000    | 0.011  | 0.000  |
| 15       | 166.89                  | 0.272                 | 0.000    | -0.013 | 3.212                 | -0.009   | -0.155 | 0.001  |
| 16       | 201.34                  | -0.110                | 0.000    | 0.004  | 8.020                 | -0.047   | -0.321 | -0.002 |
| 17       | 223.58                  | 0.011                 | 0.000    | 0.000  | 9.687                 | -0.062   | -0.349 | 0.000  |
| 18       | 228.79                  | -6.518                | -0.028   | 0.230  | -1.275                | -0.001   | 0.045  | 0.034  |
| 19       | 238.58                  | -0.020                | 0.000    | 0.001  | -8.310                | -0.043   | 0.281  | 0.000  |
| 20       | 238.92                  | 0.178                 | 0.000    | -0.006 | -2.768                | -0.005   | 0.093  | -0.001 |
| 21       | 240.51                  | 0.091                 | 0.000    | -0.003 | 3.582                 | -0.008   | -0.120 | -0.001 |
| 22       | 243.91                  | 0.133                 | 0.000    | -0.004 | -0.450                | 0.000    | 0.015  | 0.000  |
| 23       | 248.58                  | -0.539                | 0.000    | 0.017  | 9.696                 | -0.056   | -0.315 | 0.003  |
| 24       | 252.51                  | -0.442                | 0.000    | 0.014  | -1.007                | -0.001   | 0.032  | 0.002  |
| 25       | 253.20                  | -0.343                | 0.000    | 0.011  | -17.759               | -0.185   | 0.566  | -0.002 |
| 26       | 258.34                  | 11.188                | -0.072   | -0.349 | -7.526                | -0.032   | 0.235  | 0.052  |
| 27       | 259.22                  | 21.131                | -0.255   | -0.657 | 1.222                 | -0.001   | -0.038 | -0.094 |
| 28       | 281.31                  | 0.051                 | 0.000    | -0.001 | -11.276               | -0.067   | 0.323  | 0.000  |
| 29       | 285.32                  | 0.227                 | 0.000    | -0.006 | 4.852                 | -0.012   | -0.137 | -0.001 |
| 30       | 289.15                  | -0.257                | 0.000    | 0.007  | -7.270                | -0.027   | 0.203  | -0.001 |
| 31       | 290.74                  | -0.489                | 0.000    | 0.014  | -6.193                | -0.020   | 0.172  | -0.002 |
| 32       | 292.88                  | -12.108               | -0.074   | 0.333  | -11.191               | -0.063   | 0.308  | -0.054 |
| 33       | 315.20                  | -0.076                | 0.000    | 0.002  | 5.508                 | -0.014   | -0.141 | 0.000  |
| 34       | 322.92                  | 0.090                 | 0.000    | -0.002 | 1.346                 | -0.001   | -0.034 | 0.000  |
| 35       | 330.98                  | 0.076                 | 0.000    | -0.002 | 1.477                 | -0.001   | -0.036 | 0.000  |
| 36       | 331.92                  | -0.192                | 0.000    | 0.005  | 0.236                 | 0.000    | -0.006 | -0.001 |
| 37       | 336.73                  | -0.203                | 0.000    | 0.005  | 5.773                 | -0.015   | -0.138 | 0.001  |
| 38       | 336.98                  | 0.171                 | 0.000    | -0.004 | 3.132                 | -0.004   | -0.075 | -0.001 |
| 39       | 337.73                  | -0.051                | 0.000    | 0.001  | -2.432                | -0.003   | 0.058  | 0.000  |
| 40       | 342.64                  | 0.067                 | 0.000    | -0.002 | -1.002                | 0.000    | 0.024  | 0.001  |
| 41       | 343.67                  | -0.045                | 0.000    | 0.001  | 4.510                 | -0.009   | -0.106 | 0.000  |

Continued on next page

— Continued from previous page

| $\alpha$ | Freq. /cm <sup>-1</sup> | $\kappa_{\alpha}$ / meV | dE / meV | dQ     | $\kappa_{\alpha}$ / meV | dE / meV | dQ     | $\xi$  |
|----------|-------------------------|-------------------------|----------|--------|-------------------------|----------|--------|--------|
| 42       | 349.09                  | -0.112                  | 0.000    | 0.003  | -2.548                  | -0.003   | 0.059  | -0.001 |
| 43       | 359.10                  | -0.355                  | 0.000    | 0.008  | -2.484                  | -0.003   | 0.056  | -0.001 |
| 44       | 365.63                  | 0.708                   | 0.000    | -0.016 | 4.245                   | -0.007   | -0.094 | 0.003  |
| 45       | 374.78                  | -29.524                 | -0.345   | 0.635  | 1.856                   | -0.001   | -0.040 | -0.135 |
| 46       | 397.68                  | 0.071                   | 0.000    | -0.001 | 14.672                  | -0.080   | -0.298 | 0.000  |
| 47       | 398.76                  | 0.015                   | 0.000    | 0.000  | 0.569                   | 0.000    | -0.012 | 0.000  |
| 48       | 402.17                  | 0.084                   | 0.000    | -0.002 | 6.468                   | -0.015   | -0.130 | 0.000  |
| 49       | 411.18                  | 0.088                   | 0.000    | -0.002 | 4.724                   | -0.008   | -0.093 | -0.001 |
| 50       | 414.21                  | 0.088                   | 0.000    | -0.002 | 1.631                   | -0.001   | -0.032 | 0.000  |
| 51       | 427.83                  | -0.542                  | 0.000    | 0.010  | -2.629                  | -0.002   | 0.050  | 0.002  |
| 52       | 435.71                  | 23.205                  | -0.183   | -0.430 | -15.283                 | -0.079   | 0.283  | -0.104 |
| 53       | 468.07                  | 0.015                   | 0.000    | 0.000  | -2.438                  | -0.002   | 0.042  | 0.000  |
| 54       | 485.28                  | -0.096                  | 0.000    | 0.002  | -6.270                  | -0.012   | 0.104  | 0.001  |
| 55       | 507.84                  | 10.886                  | -0.035   | -0.173 | 9.647                   | -0.027   | -0.153 | -0.056 |
| 56       | 511.26                  | -0.671                  | 0.000    | 0.011  | -3.721                  | -0.004   | 0.059  | 0.003  |
| 57       | 521.76                  | -0.211                  | 0.000    | 0.003  | 7.330                   | -0.015   | -0.113 | 0.001  |
| 58       | 525.67                  | 0.012                   | 0.000    | 0.000  | 14.647                  | -0.060   | -0.225 | 0.000  |
| 59       | 561.37                  | -0.114                  | 0.000    | 0.002  | -30.260                 | -0.242   | 0.435  | 0.000  |
| 60       | 563.93                  | -5.758                  | -0.009   | 0.082  | 2.806                   | -0.002   | -0.040 | 0.033  |
| 61       | 564.55                  | 10.755                  | -0.030   | -0.154 | 8.748                   | -0.020   | -0.125 | -0.059 |
| 62       | 578.88                  | -0.367                  | 0.000    | 0.005  | -27.124                 | -0.188   | 0.378  | 0.002  |
| 63       | 618.44                  | -0.018                  | 0.000    | 0.000  | 3.168                   | -0.002   | -0.041 | -0.001 |
| 64       | 643.48                  | -0.055                  | 0.000    | 0.001  | -0.241                  | 0.000    | 0.003  | 0.000  |
| 65       | 651.09                  | 0.062                   | 0.000    | -0.001 | 7.578                   | -0.013   | -0.094 | -0.001 |
| 66       | 660.36                  | -0.061                  | 0.000    | 0.001  | -9.209                  | -0.019   | 0.112  | -0.001 |
| 67       | 663.17                  | -0.035                  | 0.000    | 0.000  | -9.102                  | -0.019   | 0.111  | 0.001  |
| 68       | 679.98                  | -0.163                  | 0.000    | 0.002  | 24.996                  | -0.136   | -0.296 | 0.001  |
| 69       | 681.57                  | 0.170                   | 0.000    | -0.002 | 3.135                   | -0.002   | -0.037 | -0.001 |
| 70       | 691.69                  | 16.873                  | -0.061   | -0.197 | -25.020                 | -0.134   | 0.292  | -0.092 |
| 71       | 692.91                  | 1.118                   | 0.000    | -0.013 | -1.167                  | 0.000    | 0.014  | -0.006 |
| 72       | 698.96                  | 0.159                   | 0.000    | -0.002 | -0.204                  | 0.000    | 0.002  | -0.001 |
| 73       | 713.38                  | -0.119                  | 0.000    | 0.001  | 3.090                   | -0.002   | -0.035 | 0.000  |
| 74       | 821.38                  | 0.081                   | 0.000    | -0.001 | -7.462                  | -0.010   | 0.073  | -0.001 |
| 75       | 823.62                  | 0.278                   | 0.000    | -0.003 | -4.166                  | -0.003   | 0.041  | -0.002 |
| 76       | 824.47                  | 6.493                   | -0.008   | -0.064 | 9.726                   | -0.017   | -0.095 | 0.027  |
| 77       | 826.36                  | -0.374                  | 0.000    | 0.004  | 9.986                   | -0.018   | -0.097 | -0.003 |
| 78       | 835.58                  | -0.070                  | 0.000    | 0.001  | -5.032                  | -0.004   | 0.049  | 0.001  |
| 79       | 846.60                  | 0.084                   | 0.000    | -0.001 | 29.512                  | -0.152   | -0.281 | 0.000  |
| 80       | 855.57                  | -0.040                  | 0.000    | 0.000  | 15.988                  | -0.044   | -0.151 | 0.000  |
| 81       | 877.21                  | -0.071                  | 0.000    | 0.001  | 46.915                  | -0.372   | -0.431 | 0.000  |
| 82       | 879.05                  | 0.006                   | 0.000    | 0.000  | 39.765                  | -0.267   | -0.365 | 0.000  |
| 83       | 898.67                  | -0.180                  | 0.000    | 0.002  | 29.079                  | -0.139   | -0.261 | -0.001 |
| 84       | 900.60                  | 0.103                   | 0.000    | -0.001 | 18.890                  | -0.059   | -0.169 | 0.001  |
| 85       | 902.45                  | 0.082                   | 0.000    | -0.001 | 33.694                  | -0.186   | -0.301 | -0.002 |

Continued on next page



— Continued from previous page

| $\alpha$ | Freq. /cm <sup>-1</sup> | $\kappa_{\alpha}$ / meV | dE / meV | dQ     | $\kappa_{\alpha}$ / meV | dE / meV | dQ     | $\xi$  |
|----------|-------------------------|-------------------------|----------|--------|-------------------------|----------|--------|--------|
| 86       | 905.76                  | 0.093                   | 0.000    | -0.001 | 17.641                  | -0.051   | -0.157 | 0.002  |
| 87       | 926.72                  | -0.033                  | 0.000    | 0.000  | 50.742                  | -0.412   | -0.442 | 0.000  |
| 88       | 928.27                  | -0.057                  | 0.000    | 0.000  | 70.820                  | -0.801   | -0.615 | 0.000  |
| 89       | 936.91                  | 0.091                   | 0.000    | -0.001 | -7.464                  | -0.009   | 0.064  | 0.000  |
| 90       | 943.49                  | -0.030                  | 0.000    | 0.000  | 5.090                   | -0.004   | -0.044 | 0.000  |
| 91       | 943.60                  | -0.031                  | 0.000    | 0.000  | -5.382                  | -0.005   | 0.046  | 0.000  |
| 92       | 943.77                  | 0.056                   | 0.000    | 0.000  | 15.852                  | -0.039   | -0.135 | 0.000  |
| 93       | 943.96                  | 0.111                   | 0.000    | -0.001 | -1.387                  | 0.000    | 0.012  | -0.001 |
| 94       | 946.92                  | -0.452                  | 0.000    | 0.004  | 25.147                  | -0.099   | -0.214 | 0.001  |
| 95       | 947.13                  | 0.032                   | 0.000    | 0.000  | -58.907                 | -0.543   | 0.502  | 0.000  |
| 96       | 947.24                  | 0.075                   | 0.000    | -0.001 | 17.861                  | -0.050   | -0.152 | 0.000  |
| 97       | 948.23                  | -0.102                  | 0.000    | 0.001  | 14.513                  | -0.033   | -0.123 | 0.000  |
| 98       | 949.17                  | 0.039                   | 0.000    | 0.000  | -53.752                 | -0.451   | 0.457  | 0.000  |
| 99       | 949.22                  | -0.006                  | 0.000    | 0.000  | 12.153                  | -0.023   | -0.103 | 0.000  |
| 100      | 949.44                  | -0.013                  | 0.000    | 0.000  | -12.185                 | -0.023   | 0.104  | 0.000  |
| 101      | 949.50                  | 0.025                   | 0.000    | 0.000  | 20.147                  | -0.063   | -0.171 | 0.000  |
| 102      | 972.23                  | -18.382                 | -0.052   | 0.152  | -13.691                 | -0.029   | 0.114  | 0.085  |
| 103      | 995.69                  | -0.077                  | 0.000    | 0.001  | 0.344                   | 0.000    | -0.003 | 0.001  |
| 104      | 1006.22                 | -0.015                  | 0.000    | 0.000  | 0.702                   | 0.000    | -0.006 | 0.000  |
| 105      | 1031.64                 | -11.740                 | -0.020   | 0.092  | -37.461                 | -0.202   | 0.293  | 0.037  |
| 106      | 1036.50                 | -0.021                  | 0.000    | 0.000  | 1.754                   | 0.000    | -0.014 | 0.000  |
| 107      | 1037.46                 | -0.052                  | 0.000    | 0.000  | 15.557                  | -0.035   | -0.121 | 0.000  |
| 108      | 1040.53                 | 0.006                   | 0.000    | 0.000  | 11.784                  | -0.020   | -0.091 | 0.000  |
| 109      | 1041.73                 | 0.028                   | 0.000    | 0.000  | -41.130                 | -0.241   | 0.318  | 0.000  |
| 110      | 1041.84                 | -0.099                  | 0.000    | 0.001  | -7.756                  | -0.009   | 0.060  | 0.000  |
| 111      | 1042.08                 | 0.070                   | 0.000    | -0.001 | 10.756                  | -0.016   | -0.083 | -0.001 |
| 112      | 1042.19                 | 0.031                   | 0.000    | 0.000  | 0.948                   | 0.000    | -0.007 | -0.001 |
| 113      | 1075.14                 | 6.530                   | -0.006   | -0.049 | 16.555                  | -0.038   | -0.124 | -0.006 |
| 114      | 1094.17                 | -0.156                  | 0.000    | 0.001  | 1.218                   | 0.000    | -0.009 | 0.001  |
| 115      | 1139.66                 | -0.002                  | 0.000    | 0.000  | 28.078                  | -0.103   | -0.199 | 0.000  |
| 116      | 1143.22                 | 0.030                   | 0.000    | 0.000  | 0.044                   | 0.000    | 0.000  | 0.000  |
| 117      | 1161.39                 | 8.295                   | -0.009   | -0.058 | -19.557                 | -0.049   | 0.136  | -0.066 |
| 118      | 1196.98                 | -0.004                  | 0.000    | 0.000  | 13.260                  | -0.022   | -0.089 | 0.000  |
| 119      | 1219.19                 | -0.374                  | 0.000    | 0.002  | 9.013                   | -0.010   | -0.060 | 0.001  |
| 120      | 1239.25                 | 0.032                   | 0.000    | 0.000  | -7.505                  | -0.007   | 0.049  | 0.000  |
| 121      | 1239.30                 | 0.025                   | 0.000    | 0.000  | -1.410                  | 0.000    | 0.009  | 0.000  |
| 122      | 1239.53                 | 0.043                   | 0.000    | 0.000  | 12.583                  | -0.019   | -0.082 | 0.000  |
| 123      | 1239.64                 | 0.026                   | 0.000    | 0.000  | 1.875                   | 0.000    | -0.012 | 0.000  |
| 124      | 1239.89                 | 0.080                   | 0.000    | -0.001 | -2.064                  | -0.001   | 0.013  | -0.001 |
| 125      | 1242.84                 | 0.240                   | 0.000    | -0.002 | 8.853                   | -0.009   | -0.057 | 0.001  |
| 126      | 1245.47                 | -0.184                  | 0.000    | 0.001  | -13.866                 | -0.023   | 0.090  | -0.001 |
| 127      | 1246.17                 | 1.481                   | 0.000    | -0.010 | -43.374                 | -0.224   | 0.281  | 0.006  |
| 128      | 1246.38                 | -11.916                 | -0.017   | 0.077  | -41.501                 | -0.205   | 0.269  | 0.048  |
| 129      | 1249.01                 | 0.731                   | 0.000    | -0.005 | 15.937                  | -0.030   | -0.103 | -0.003 |

Continued on next page

— Continued from previous page

| $\alpha$ | Freq. /cm <sup>-1</sup> | $\kappa_{\alpha}$ / meV | dE / meV | dQ     | $\kappa_{\alpha}$ / meV | dE / meV | dQ     | $\xi$  |
|----------|-------------------------|-------------------------|----------|--------|-------------------------|----------|--------|--------|
| 130      | 1251.58                 | 0.060                   | 0.000    | 0.000  | -2.521                  | -0.001   | 0.016  | 0.000  |
| 131      | 1286.36                 | -28.288                 | -0.092   | 0.177  | -57.047                 | -0.375   | 0.358  | 0.120  |
| 132      | 1290.87                 | 0.386                   | 0.000    | -0.002 | -75.762                 | -0.659   | 0.473  | -0.002 |
| 133      | 1301.27                 | -0.029                  | 0.000    | 0.000  | 21.986                  | -0.055   | -0.136 | 0.000  |
| 134      | 1302.69                 | 0.116                   | 0.000    | -0.001 | -40.987                 | -0.191   | 0.254  | 0.000  |
| 135      | 1333.48                 | 58.836                  | -0.385   | -0.356 | -36.347                 | -0.147   | 0.220  | -0.256 |
| 136      | 1337.26                 | 0.235                   | 0.000    | -0.001 | -14.541                 | -0.023   | 0.088  | -0.002 |
| 137      | 1365.13                 | 0.563                   | 0.000    | -0.003 | -19.682                 | -0.042   | 0.116  | -0.003 |
| 138      | 1381.26                 | 2.074                   | 0.000    | -0.012 | 45.835                  | -0.225   | -0.268 | -0.009 |
| 139      | 1381.60                 | 0.520                   | 0.000    | -0.003 | 26.966                  | -0.078   | -0.157 | -0.002 |
| 140      | 1382.10                 | 25.199                  | -0.068   | -0.147 | -9.342                  | -0.009   | 0.055  | -0.116 |
| 141      | 1382.69                 | 1.192                   | 0.000    | -0.007 | -16.434                 | -0.029   | 0.096  | -0.006 |
| 142      | 1382.75                 | 1.409                   | 0.000    | -0.008 | -0.912                  | 0.000    | 0.005  | -0.007 |
| 143      | 1383.08                 | 0.192                   | 0.000    | -0.001 | 31.604                  | -0.107   | -0.184 | 0.001  |
| 144      | 1383.10                 | 2.309                   | -0.001   | -0.013 | 5.422                   | -0.003   | -0.032 | -0.010 |
| 145      | 1389.89                 | 0.532                   | 0.000    | -0.003 | 9.558                   | -0.010   | -0.055 | -0.002 |
| 146      | 1408.39                 | -37.162                 | -0.145   | 0.213  | 28.472                  | -0.085   | -0.163 | 0.199  |
| 147      | 1413.70                 | -3.308                  | -0.001   | 0.019  | 33.044                  | -0.114   | -0.189 | 0.014  |
| 148      | 1413.92                 | -0.970                  | 0.000    | 0.006  | -16.369                 | -0.028   | 0.093  | 0.005  |
| 149      | 1415.75                 | 6.975                   | -0.005   | -0.040 | -16.210                 | -0.028   | 0.092  | -0.031 |
| 150      | 1415.95                 | 40.181                  | -0.169   | -0.229 | -11.444                 | -0.014   | 0.065  | -0.189 |
| 151      | 1420.74                 | -2.508                  | -0.001   | 0.014  | -61.984                 | -0.401   | 0.352  | 0.010  |
| 152      | 1426.35                 | 0.146                   | 0.000    | -0.001 | 33.687                  | -0.118   | -0.190 | -0.001 |
| 153      | 1428.84                 | -0.284                  | 0.000    | 0.002  | -7.023                  | -0.005   | 0.040  | 0.001  |
| 154      | 1437.07                 | 129.908                 | -1.740   | -0.729 | -6.703                  | -0.005   | 0.038  | -0.565 |
| 155      | 1461.88                 | 21.123                  | -0.045   | -0.117 | 10.532                  | -0.011   | -0.058 | -0.093 |
| 156      | 1467.06                 | -1.767                  | 0.000    | 0.010  | -12.780                 | -0.017   | 0.070  | 0.008  |
| 157      | 1470.16                 | 0.094                   | 0.000    | -0.001 | 25.321                  | -0.065   | -0.139 | 0.000  |
| 158      | 1470.37                 | 0.201                   | 0.000    | -0.001 | 25.685                  | -0.066   | -0.141 | -0.001 |
| 159      | 1470.65                 | -0.070                  | 0.000    | 0.000  | -15.434                 | -0.024   | 0.085  | 0.001  |
| 160      | 1470.75                 | 0.002                   | 0.000    | 0.000  | 28.684                  | -0.083   | -0.157 | 0.000  |
| 161      | 1472.68                 | -0.204                  | 0.000    | 0.001  | -6.949                  | -0.005   | 0.038  | 0.001  |
| 162      | 1472.76                 | -0.351                  | 0.000    | 0.002  | 0.526                   | 0.000    | -0.003 | 0.001  |
| 163      | 1473.16                 | 0.218                   | 0.000    | -0.001 | 1.494                   | 0.000    | -0.008 | -0.001 |
| 164      | 1473.32                 | -0.108                  | 0.000    | 0.001  | -100.721                | -1.020   | 0.551  | -0.001 |
| 165      | 1474.38                 | -0.286                  | 0.000    | 0.002  | 24.193                  | -0.059   | -0.132 | 0.001  |
| 166      | 1476.12                 | 0.056                   | 0.000    | 0.000  | -2.618                  | -0.001   | 0.014  | 0.000  |
| 167      | 1478.91                 | 0.164                   | 0.000    | -0.001 | 30.499                  | -0.093   | -0.166 | 0.001  |
| 168      | 1480.79                 | -4.192                  | -0.002   | 0.023  | 0.680                   | 0.000    | -0.004 | 0.022  |
| 169      | 1485.26                 | -0.158                  | 0.000    | 0.001  | -67.912                 | -0.460   | 0.369  | 0.001  |
| 170      | 1486.03                 | 0.289                   | 0.000    | -0.002 | -64.085                 | -0.410   | 0.348  | -0.001 |
| 171      | 1494.75                 | -0.258                  | 0.000    | 0.001  | 35.089                  | -0.122   | -0.189 | 0.001  |
| 172      | 1494.81                 | -0.124                  | 0.000    | 0.001  | 6.285                   | -0.004   | -0.034 | 0.001  |
| 173      | 1494.91                 | 0.084                   | 0.000    | 0.000  | 21.651                  | -0.046   | -0.117 | 0.000  |

Continued on next page

— Continued from previous page

| $\alpha$ | Freq. /cm <sup>-1</sup> | $\kappa_{\alpha}$ / meV | dE / meV | dQ     | $\kappa_{\alpha}$ / meV | dE / meV | dQ     | $\xi$  |
|----------|-------------------------|-------------------------|----------|--------|-------------------------|----------|--------|--------|
| 174      | 1494.95                 | 0.217                   | 0.000    | -0.001 | 31.520                  | -0.098   | -0.170 | 0.002  |
| 175      | 1496.87                 | -0.006                  | 0.000    | 0.000  | -40.965                 | -0.166   | 0.221  | 0.000  |
| 176      | 1498.18                 | 0.203                   | 0.000    | -0.001 | 40.580                  | -0.163   | -0.218 | -0.001 |
| 177      | 1498.85                 | 9.247                   | -0.008   | -0.050 | -0.419                  | 0.000    | 0.002  | -0.045 |
| 178      | 1502.51                 | 0.252                   | 0.000    | -0.001 | -18.975                 | -0.036   | 0.102  | -0.001 |
| 179      | 1514.73                 | 2.198                   | 0.000    | -0.012 | 23.851                  | -0.056   | -0.127 | -0.011 |
| 180      | 1514.96                 | 11.113                  | -0.012   | -0.059 | -26.541                 | -0.069   | 0.141  | -0.046 |
| 181      | 1515.02                 | 5.579                   | -0.003   | -0.030 | 25.743                  | -0.065   | -0.137 | -0.030 |
| 182      | 1515.43                 | 0.329                   | 0.000    | -0.002 | 57.201                  | -0.320   | -0.304 | -0.001 |
| 183      | 1545.91                 | 0.005                   | 0.000    | 0.000  | -60.930                 | -0.356   | 0.318  | 0.000  |
| 184      | 1568.47                 | 1.044                   | 0.000    | -0.005 | -15.246                 | -0.022   | 0.078  | -0.004 |
| 185      | 1633.27                 | 133.775                 | -1.624   | -0.661 | 52.185                  | -0.247   | -0.258 | -0.594 |
| 186      | 1641.96                 | -4.500                  | -0.002   | 0.022  | -2.119                  | 0.000    | 0.010  | 0.020  |
| 187      | 1661.09                 | -54.069                 | -0.261   | 0.263  | 19.954                  | -0.036   | -0.097 | 0.255  |
| 188      | 1669.59                 | 0.633                   | 0.000    | -0.003 | -0.168                  | 0.000    | 0.001  | -0.003 |
| 189      | 1677.42                 | 0.545                   | 0.000    | -0.003 | 7.136                   | -0.004   | -0.034 | -0.003 |
| 190      | 1690.87                 | -1.135                  | 0.000    | 0.005  | 2.998                   | -0.001   | -0.014 | 0.005  |
| 191      | 3039.23                 | 0.042                   | 0.000    | 0.000  | -6.996                  | -0.002   | 0.019  | 0.001  |
| 192      | 3039.29                 | 0.001                   | 0.000    | 0.000  | 27.044                  | -0.036   | -0.072 | 0.000  |
| 193      | 3039.36                 | -0.032                  | 0.000    | 0.000  | 50.952                  | -0.127   | -0.135 | -0.001 |
| 194      | 3039.38                 | -0.128                  | 0.000    | 0.000  | -47.875                 | -0.112   | 0.127  | -0.002 |
| 195      | 3040.60                 | -0.001                  | 0.000    | 0.000  | -18.757                 | -0.017   | 0.050  | 0.000  |
| 196      | 3040.64                 | 0.019                   | 0.000    | 0.000  | -11.448                 | -0.006   | 0.030  | 0.000  |
| 197      | 3040.65                 | -0.008                  | 0.000    | 0.000  | 23.527                  | -0.027   | -0.062 | 0.000  |
| 198      | 3040.72                 | 0.001                   | 0.000    | 0.000  | 39.888                  | -0.078   | -0.106 | 0.001  |
| 199      | 3046.44                 | -0.050                  | 0.000    | 0.000  | -42.578                 | -0.088   | 0.113  | -0.001 |
| 200      | 3046.49                 | -0.110                  | 0.000    | 0.000  | -70.785                 | -0.244   | 0.187  | 0.002  |
| 201      | 3046.57                 | 0.389                   | 0.000    | -0.001 | -34.418                 | -0.058   | 0.091  | 0.000  |
| 202      | 3046.62                 | -0.821                  | 0.000    | 0.002  | 15.706                  | -0.012   | -0.042 | 0.006  |
| 203      | 3112.54                 | 0.535                   | 0.000    | -0.001 | -100.347                | -0.479   | 0.260  | 0.003  |
| 204      | 3112.61                 | 0.276                   | 0.000    | -0.001 | 57.933                  | -0.160   | -0.150 | -0.001 |
| 205      | 3112.66                 | 0.033                   | 0.000    | 0.000  | 116.483                 | -0.646   | -0.302 | -0.001 |
| 206      | 3112.69                 | -1.848                  | 0.000    | 0.005  | 31.500                  | -0.047   | -0.082 | -0.010 |
| 207      | 3115.49                 | 0.010                   | 0.000    | 0.000  | -158.400                | -1.194   | 0.410  | 0.000  |
| 208      | 3115.51                 | 0.008                   | 0.000    | 0.000  | -51.350                 | -0.125   | 0.133  | 0.000  |
| 209      | 3115.55                 | -0.014                  | 0.000    | 0.000  | 16.746                  | -0.013   | -0.043 | 0.000  |
| 210      | 3115.59                 | -0.017                  | 0.000    | 0.000  | 57.540                  | -0.157   | -0.149 | 0.001  |
| 211      | 3120.29                 | 0.025                   | 0.000    | 0.000  | -7.437                  | -0.003   | 0.019  | -0.001 |
| 212      | 3120.37                 | 0.035                   | 0.000    | 0.000  | 10.925                  | -0.006   | -0.028 | 0.000  |
| 213      | 3120.40                 | 0.002                   | 0.000    | 0.000  | -41.943                 | -0.084   | 0.108  | -0.002 |
| 214      | 3120.83                 | -1.628                  | 0.000    | 0.004  | -5.277                  | -0.001   | 0.014  | -0.007 |
| 215      | 3122.04                 | -0.018                  | 0.000    | 0.000  | 32.735                  | -0.051   | -0.085 | 0.000  |
| 216      | 3122.05                 | 0.014                   | 0.000    | 0.000  | -7.244                  | -0.002   | 0.019  | 0.000  |
| 217      | 3122.06                 | -0.025                  | 0.000    | 0.000  | -35.097                 | -0.058   | 0.091  | 0.001  |

Continued on next page

— Continued from previous page

| $\alpha$ | Freq. /cm <sup>-1</sup> | $\kappa_\alpha$ / meV | dE / meV | dQ     | $\kappa_\alpha$ / meV | dE / meV | dQ     | $\xi$  |
|----------|-------------------------|-----------------------|----------|--------|-----------------------|----------|--------|--------|
| 218      | 3122.07                 | 0.006                 | 0.000    | 0.000  | 5.818                 | -0.002   | -0.015 | 0.001  |
| 219      | 3126.02                 | 0.027                 | 0.000    | 0.000  | 2.456                 | 0.000    | -0.006 | 0.000  |
| 220      | 3126.06                 | 0.006                 | 0.000    | 0.000  | -28.084               | -0.037   | 0.072  | 0.000  |
| 221      | 3126.11                 | 0.031                 | 0.000    | 0.000  | -60.455               | -0.173   | 0.156  | 0.002  |
| 222      | 3126.11                 | -0.004                | 0.000    | 0.000  | 14.480                | -0.010   | -0.037 | -0.001 |
| 223      | 3127.30                 | -0.198                | 0.000    | 0.001  | -66.731               | -0.211   | 0.172  | 0.001  |
| 224      | 3127.36                 | -0.069                | 0.000    | 0.000  | -6.313                | -0.002   | 0.016  | 0.000  |
| 225      | 3127.53                 | 0.493                 | 0.000    | -0.001 | 31.464                | -0.047   | -0.081 | 0.003  |
| 226      | 3127.58                 | -1.048                | 0.000    | 0.003  | 6.415                 | -0.002   | -0.017 | 0.006  |
| 227      | 3201.25                 | -0.060                | 0.000    | 0.000  | -51.097               | -0.121   | 0.129  | 0.000  |
| 228      | 3201.59                 | -0.019                | 0.000    | 0.000  | -22.012               | -0.022   | 0.055  | 0.000  |
| 229      | 3206.04                 | 0.403                 | 0.000    | -0.001 | 44.090                | -0.090   | -0.111 | -0.002 |
| 230      | 3206.23                 | -3.054                | 0.000    | 0.008  | 163.722               | -1.239   | -0.412 | 0.011  |
| 231      | 3212.56                 | 0.007                 | 0.000    | 0.000  | 28.921                | -0.039   | -0.073 | 0.000  |
| 232      | 3212.72                 | 0.085                 | 0.000    | 0.000  | 12.553                | -0.007   | -0.032 | 0.000  |
| 233      | 3222.07                 | -4.639                | -0.001   | 0.012  | -12.036               | -0.007   | 0.030  | 0.023  |
| 234      | 3222.15                 | 6.327                 | -0.002   | -0.016 | -7.006                | -0.002   | 0.018  | -0.029 |

**Table S7:** LVC Analysis for T1 of TBPe.

| $\alpha$ | Freq. /cm <sup>-1</sup> | $\kappa_\alpha$       |          |        | $\kappa_\alpha^*$     |          |        | $\xi$  |
|----------|-------------------------|-----------------------|----------|--------|-----------------------|----------|--------|--------|
|          |                         | $\kappa_\alpha$ / meV | dE / meV | dQ     | $\kappa_\alpha$ / meV | dE / meV | dQ     |        |
| 1        | 19.71                   | 0.099                 | 0.000    | -0.041 | 0.050                 | 0.000    | -0.021 | 0.000  |
| 2        | 25.22                   | 0.151                 | 0.000    | -0.048 | 1.705                 | -0.017   | -0.545 | 0.000  |
| 3        | 29.15                   | -0.164                | 0.000    | 0.045  | 0.136                 | 0.000    | -0.038 | 0.000  |
| 4        | 30.92                   | -0.049                | 0.000    | 0.013  | -2.689                | -0.035   | 0.702  | 0.000  |
| 5        | 31.41                   | -0.073                | 0.000    | 0.019  | 2.108                 | -0.021   | -0.541 | 0.000  |
| 6        | 48.26                   | -0.033                | 0.000    | 0.006  | -0.031                | 0.000    | 0.005  | 0.000  |
| 7        | 72.92                   | -0.048                | 0.000    | 0.005  | -1.439                | -0.004   | 0.159  | 0.000  |
| 8        | 80.77                   | -0.032                | 0.000    | 0.003  | -5.665                | -0.059   | 0.566  | 0.000  |
| 9        | 91.43                   | 2.677                 | -0.012   | -0.236 | -5.364                | -0.047   | 0.473  | 0.014  |
| 10       | 94.40                   | 0.042                 | 0.000    | -0.004 | 3.510                 | -0.019   | -0.300 | 0.000  |
| 11       | 115.51                  | -0.013                | 0.000    | 0.001  | -3.057                | -0.012   | 0.213  | 0.000  |
| 12       | 122.18                  | -0.254                | 0.000    | 0.017  | -1.242                | -0.002   | 0.082  | 0.000  |
| 13       | 122.91                  | -0.079                | 0.000    | 0.005  | -5.240                | -0.033   | 0.344  | 0.000  |
| 14       | 153.00                  | -0.151                | 0.000    | 0.008  | 5.187                 | -0.026   | -0.273 | 0.001  |
| 15       | 166.89                  | 0.323                 | 0.000    | -0.016 | 2.434                 | -0.005   | -0.118 | 0.001  |
| 16       | 201.34                  | -0.141                | 0.000    | 0.006  | 11.005                | -0.089   | -0.441 | 0.000  |
| 17       | 223.58                  | -0.002                | 0.000    | 0.000  | 4.963                 | -0.016   | -0.179 | 0.000  |
| 18       | 228.79                  | -8.422                | -0.046   | 0.297  | 0.859                 | 0.000    | -0.030 | 0.034  |
| 19       | 238.58                  | -0.030                | 0.000    | 0.001  | -15.624               | -0.152   | 0.528  | 0.000  |
| 20       | 238.92                  | 0.251                 | 0.000    | -0.008 | -4.352                | -0.012   | 0.147  | -0.001 |
| 21       | 240.51                  | 0.118                 | 0.000    | -0.004 | -1.453                | -0.001   | 0.049  | 0.000  |
| 22       | 243.91                  | 0.146                 | 0.000    | -0.005 | 10.591                | -0.068   | -0.350 | -0.001 |

Continued on next page

— Continued from previous page

| $\alpha$ | Freq. /cm <sup>-1</sup> | $\kappa_{\alpha}$ / meV | dE / meV | dQ     | $\kappa_{\alpha}$ / meV | dE / meV | dQ     | $\xi$  |
|----------|-------------------------|-------------------------|----------|--------|-------------------------|----------|--------|--------|
| 23       | 248.58                  | -0.645                  | 0.000    | 0.021  | 13.932                  | -0.116   | -0.452 | 0.002  |
| 24       | 252.51                  | -0.540                  | 0.000    | 0.017  | 2.184                   | -0.003   | -0.070 | 0.002  |
| 25       | 253.20                  | -0.401                  | 0.000    | 0.013  | -19.755                 | -0.228   | 0.629  | -0.001 |
| 26       | 258.34                  | 13.198                  | -0.100   | -0.412 | -16.653                 | -0.159   | 0.520  | 0.044  |
| 27       | 259.22                  | 24.955                  | -0.356   | -0.776 | -1.062                  | -0.001   | 0.033  | -0.080 |
| 28       | 281.31                  | 0.055                   | 0.000    | -0.002 | -18.906                 | -0.188   | 0.542  | 0.000  |
| 29       | 285.32                  | 0.268                   | 0.000    | -0.008 | 6.004                   | -0.019   | -0.170 | -0.001 |
| 30       | 289.15                  | -0.292                  | 0.000    | 0.008  | 3.040                   | -0.005   | -0.085 | -0.001 |
| 31       | 290.74                  | -0.545                  | 0.000    | 0.015  | -2.701                  | -0.004   | 0.075  | -0.002 |
| 32       | 292.88                  | -13.656                 | -0.094   | 0.376  | -5.224                  | -0.014   | 0.144  | -0.042 |
| 33       | 315.20                  | -0.093                  | 0.000    | 0.002  | 6.525                   | -0.020   | -0.167 | 0.000  |
| 34       | 322.92                  | 0.092                   | 0.000    | -0.002 | 5.574                   | -0.014   | -0.139 | 0.000  |
| 35       | 330.98                  | 0.085                   | 0.000    | -0.002 | 0.488                   | 0.000    | -0.012 | 0.000  |
| 36       | 331.92                  | -0.203                  | 0.000    | 0.005  | -0.958                  | 0.000    | 0.023  | -0.001 |
| 37       | 336.73                  | -0.224                  | 0.000    | 0.005  | 9.225                   | -0.037   | -0.221 | 0.001  |
| 38       | 336.98                  | 0.171                   | 0.000    | -0.004 | -0.748                  | 0.000    | 0.018  | -0.001 |
| 39       | 337.73                  | -0.054                  | 0.000    | 0.001  | -1.506                  | -0.001   | 0.036  | 0.000  |
| 40       | 342.64                  | 0.060                   | 0.000    | -0.001 | -0.713                  | 0.000    | 0.017  | 0.000  |
| 41       | 343.67                  | -0.065                  | 0.000    | 0.002  | 0.914                   | 0.000    | -0.021 | 0.000  |
| 42       | 349.09                  | -0.114                  | 0.000    | 0.003  | -3.580                  | -0.005   | 0.083  | 0.000  |
| 43       | 359.10                  | -0.405                  | 0.000    | 0.009  | -10.289                 | -0.044   | 0.231  | -0.001 |
| 44       | 365.63                  | 0.807                   | 0.000    | -0.018 | 12.391                  | -0.062   | -0.273 | 0.002  |
| 45       | 374.78                  | -33.798                 | -0.452   | 0.727  | -0.092                  | 0.000    | 0.002  | -0.110 |
| 46       | 397.68                  | 0.085                   | 0.000    | -0.002 | 4.341                   | -0.007   | -0.088 | 0.000  |
| 47       | 398.76                  | 0.012                   | 0.000    | 0.000  | -5.922                  | -0.013   | 0.120  | 0.000  |
| 48       | 402.17                  | 0.099                   | 0.000    | -0.002 | 11.561                  | -0.049   | -0.232 | 0.000  |
| 49       | 411.18                  | 0.093                   | 0.000    | -0.002 | 29.964                  | -0.324   | -0.588 | -0.001 |
| 50       | 414.21                  | 0.111                   | 0.000    | -0.002 | -5.167                  | -0.010   | 0.101  | 0.000  |
| 51       | 427.83                  | -0.667                  | 0.000    | 0.013  | -6.982                  | -0.017   | 0.132  | 0.002  |
| 52       | 435.71                  | 29.252                  | -0.291   | -0.542 | 4.166                   | -0.006   | -0.077 | -0.090 |
| 53       | 468.07                  | -0.024                  | 0.000    | 0.000  | -3.503                  | -0.004   | 0.060  | 0.000  |
| 54       | 485.28                  | -0.150                  | 0.000    | 0.002  | -4.263                  | -0.006   | 0.071  | 0.001  |
| 55       | 507.84                  | 12.529                  | -0.046   | -0.199 | 4.263                   | -0.005   | -0.068 | -0.050 |
| 56       | 511.26                  | -0.743                  | 0.000    | 0.012  | -9.771                  | -0.028   | 0.154  | 0.003  |
| 57       | 521.76                  | -0.178                  | 0.000    | 0.003  | 14.741                  | -0.062   | -0.228 | 0.001  |
| 58       | 525.67                  | 0.013                   | 0.000    | 0.000  | -19.137                 | -0.103   | 0.294  | 0.000  |
| 59       | 561.37                  | -0.062                  | 0.000    | 0.001  | -8.648                  | -0.020   | 0.124  | 0.000  |
| 60       | 563.93                  | -1.823                  | -0.001   | 0.026  | 4.037                   | -0.004   | -0.058 | 0.009  |
| 61       | 564.55                  | 3.191                   | -0.003   | -0.046 | 22.241                  | -0.130   | -0.318 | -0.015 |
| 62       | 578.88                  | -0.169                  | 0.000    | 0.002  | 2.620                   | -0.002   | -0.037 | 0.001  |
| 63       | 618.44                  | -0.029                  | 0.000    | 0.000  | 6.750                   | -0.011   | -0.088 | 0.000  |
| 64       | 643.48                  | -0.025                  | 0.000    | 0.000  | -2.959                  | -0.002   | 0.037  | 0.000  |
| 65       | 651.09                  | 0.068                   | 0.000    | -0.001 | -15.595                 | -0.055   | 0.193  | 0.000  |
| 66       | 660.36                  | -0.054                  | 0.000    | 0.001  | -8.888                  | -0.018   | 0.109  | 0.000  |

Continued on next page

— Continued from previous page

| $\alpha$ | Freq. /cm <sup>-1</sup> | $\kappa_\alpha$ / meV | dE / meV | dQ     | $\kappa_\alpha$ / meV | dE / meV | dQ     | $\xi$  |
|----------|-------------------------|-----------------------|----------|--------|-----------------------|----------|--------|--------|
| 67       | 663.17                  | -0.010                | 0.000    | 0.000  | 8.937                 | -0.018   | -0.109 | 0.000  |
| 68       | 679.98                  | -0.191                | 0.000    | 0.002  | -17.268               | -0.065   | 0.205  | 0.001  |
| 69       | 681.57                  | 0.156                 | 0.000    | -0.002 | 8.356                 | -0.015   | -0.099 | -0.001 |
| 70       | 691.69                  | 15.670                | -0.053   | -0.183 | -11.979               | -0.031   | 0.140  | -0.066 |
| 71       | 692.91                  | 1.038                 | 0.000    | -0.012 | 4.994                 | -0.005   | -0.058 | -0.004 |
| 72       | 698.96                  | 0.166                 | 0.000    | -0.002 | -3.871                | -0.003   | 0.045  | -0.001 |
| 73       | 713.38                  | -0.127                | 0.000    | 0.001  | -34.415               | -0.246   | 0.389  | 0.000  |
| 74       | 821.38                  | 0.086                 | 0.000    | -0.001 | -6.065                | -0.007   | 0.060  | 0.000  |
| 75       | 823.62                  | 0.279                 | 0.000    | -0.003 | 3.250                 | -0.002   | -0.032 | -0.001 |
| 76       | 824.47                  | 6.434                 | -0.007   | -0.063 | 6.725                 | -0.008   | -0.066 | 0.019  |
| 77       | 826.36                  | -0.354                | 0.000    | 0.003  | 16.246                | -0.047   | -0.159 | -0.001 |
| 78       | 835.58                  | -0.071                | 0.000    | 0.001  | -9.337                | -0.015   | 0.090  | 0.000  |
| 79       | 846.60                  | 0.077                 | 0.000    | -0.001 | -3.482                | -0.002   | 0.033  | 0.000  |
| 80       | 855.57                  | -0.046                | 0.000    | 0.000  | -38.350               | -0.255   | 0.362  | 0.000  |
| 81       | 877.21                  | -0.079                | 0.000    | 0.001  | -9.735                | -0.016   | 0.090  | 0.000  |
| 82       | 879.05                  | -0.002                | 0.000    | 0.000  | 11.216                | -0.021   | -0.103 | 0.000  |
| 83       | 898.67                  | -0.123                | 0.000    | 0.001  | 70.551                | -0.821   | -0.633 | 0.000  |
| 84       | 900.60                  | 0.138                 | 0.000    | -0.001 | -12.973               | -0.028   | 0.116  | 0.000  |
| 85       | 902.45                  | 0.097                 | 0.000    | -0.001 | 35.222                | -0.204   | -0.315 | 0.000  |
| 86       | 905.76                  | 0.144                 | 0.000    | -0.001 | 50.052                | -0.410   | -0.446 | 0.000  |
| 87       | 926.72                  | -0.039                | 0.000    | 0.000  | 64.128                | -0.658   | -0.558 | 0.000  |
| 88       | 928.27                  | -0.061                | 0.000    | 0.001  | 55.898                | -0.499   | -0.486 | 0.000  |
| 89       | 936.91                  | 0.091                 | 0.000    | -0.001 | -1.039                | 0.000    | 0.009  | 0.000  |
| 90       | 943.49                  | -0.064                | 0.000    | 0.001  | 32.169                | -0.163   | -0.275 | 0.000  |
| 91       | 943.60                  | -0.027                | 0.000    | 0.000  | -7.164                | -0.008   | 0.061  | 0.000  |
| 92       | 943.77                  | 0.051                 | 0.000    | 0.000  | 22.538                | -0.080   | -0.193 | 0.000  |
| 93       | 943.96                  | 0.134                 | 0.000    | -0.001 | -26.509               | -0.110   | 0.227  | 0.000  |
| 94       | 946.92                  | -0.181                | 0.000    | 0.002  | 59.185                | -0.548   | -0.504 | -0.003 |
| 95       | 947.13                  | -0.011                | 0.000    | 0.000  | -71.525               | -0.800   | 0.609  | 0.000  |
| 96       | 947.24                  | 0.068                 | 0.000    | -0.001 | 26.765                | -0.112   | -0.228 | 0.000  |
| 97       | 948.23                  | -0.106                | 0.000    | 0.001  | 17.236                | -0.046   | -0.147 | 0.000  |
| 98       | 949.17                  | 0.034                 | 0.000    | 0.000  | -28.124               | -0.123   | 0.239  | 0.000  |
| 99       | 949.22                  | -0.005                | 0.000    | 0.000  | 41.142                | -0.264   | -0.350 | 0.000  |
| 100      | 949.44                  | -0.005                | 0.000    | 0.000  | -9.493                | -0.014   | 0.081  | 0.000  |
| 101      | 949.50                  | 0.041                 | 0.000    | 0.000  | 34.725                | -0.188   | -0.295 | 0.000  |
| 102      | 972.23                  | -20.971               | -0.067   | 0.174  | -22.507               | -0.077   | 0.187  | 0.067  |
| 103      | 995.69                  | -0.064                | 0.000    | 0.001  | -3.824                | -0.002   | 0.031  | 0.001  |
| 104      | 1006.22                 | -0.059                | 0.000    | 0.000  | 3.359                 | -0.002   | -0.027 | 0.001  |
| 105      | 1031.64                 | -21.275               | -0.065   | 0.166  | -38.586               | -0.214   | 0.302  | 0.058  |
| 106      | 1036.50                 | -0.055                | 0.000    | 0.000  | -9.712                | -0.013   | 0.076  | 0.000  |
| 107      | 1037.46                 | -0.129                | 0.000    | 0.001  | 33.158                | -0.157   | -0.258 | 0.000  |
| 108      | 1040.53                 | 0.015                 | 0.000    | 0.000  | 7.667                 | -0.008   | -0.059 | 0.000  |
| 109      | 1041.73                 | 0.033                 | 0.000    | 0.000  | -22.261               | -0.070   | 0.172  | 0.000  |
| 110      | 1041.84                 | -0.131                | 0.000    | 0.001  | 9.335                 | -0.012   | -0.072 | 0.000  |

Continued on next page

— Continued from previous page

| $\alpha$ | Freq. /cm <sup>-1</sup> | $\kappa_{\alpha}$ / meV | dE / meV | dQ     | $\kappa_{\alpha}$ / meV | dE / meV | dQ     | $\xi$  |
|----------|-------------------------|-------------------------|----------|--------|-------------------------|----------|--------|--------|
| 111      | 1042.08                 | 0.100                   | 0.000    | -0.001 | 23.132                  | -0.076   | -0.179 | 0.000  |
| 112      | 1042.19                 | 0.027                   | 0.000    | 0.000  | 7.927                   | -0.009   | -0.061 | 0.000  |
| 113      | 1075.14                 | 15.745                  | -0.034   | -0.118 | 9.288                   | -0.012   | -0.070 | -0.030 |
| 114      | 1094.17                 | -0.175                  | 0.000    | 0.001  | 23.633                  | -0.076   | -0.174 | 0.001  |
| 115      | 1139.66                 | 0.072                   | 0.000    | -0.001 | 20.446                  | -0.054   | -0.145 | 0.000  |
| 116      | 1143.22                 | 0.062                   | 0.000    | 0.000  | 4.336                   | -0.002   | -0.031 | 0.000  |
| 117      | 1161.39                 | -2.929                  | -0.001   | 0.020  | 2.192                   | -0.001   | -0.015 | -0.014 |
| 118      | 1196.98                 | 0.047                   | 0.000    | 0.000  | 26.360                  | -0.086   | -0.178 | 0.000  |
| 119      | 1219.19                 | -0.423                  | 0.000    | 0.003  | -8.026                  | -0.008   | 0.053  | 0.001  |
| 120      | 1239.25                 | 0.023                   | 0.000    | 0.000  | -11.379                 | -0.015   | 0.074  | 0.000  |
| 121      | 1239.30                 | 0.034                   | 0.000    | 0.000  | -17.513                 | -0.037   | 0.114  | 0.000  |
| 122      | 1239.53                 | 0.057                   | 0.000    | 0.000  | 20.735                  | -0.051   | -0.135 | 0.000  |
| 123      | 1239.64                 | 0.026                   | 0.000    | 0.000  | -9.097                  | -0.010   | 0.059  | 0.000  |
| 124      | 1239.89                 | 0.123                   | 0.000    | -0.001 | 17.406                  | -0.036   | -0.113 | 0.000  |
| 125      | 1242.84                 | 0.334                   | 0.000    | -0.002 | 12.038                  | -0.017   | -0.078 | 0.001  |
| 126      | 1245.47                 | -0.267                  | 0.000    | 0.002  | -12.563                 | -0.019   | 0.081  | -0.001 |
| 127      | 1246.17                 | 2.289                   | -0.001   | -0.015 | -7.075                  | -0.006   | 0.046  | 0.007  |
| 128      | 1246.38                 | -18.354                 | -0.040   | 0.119  | -79.618                 | -0.754   | 0.515  | 0.062  |
| 129      | 1249.01                 | 1.044                   | 0.000    | -0.007 | 6.808                   | -0.005   | -0.044 | -0.003 |
| 130      | 1251.58                 | 0.045                   | 0.000    | 0.000  | 5.720                   | -0.004   | -0.037 | 0.000  |
| 131      | 1286.36                 | -42.625                 | -0.209   | 0.267  | -51.728                 | -0.308   | 0.324  | 0.137  |
| 132      | 1290.87                 | 0.536                   | 0.000    | -0.003 | -56.751                 | -0.370   | 0.355  | -0.002 |
| 133      | 1301.27                 | 0.028                   | 0.000    | 0.000  | 4.349                   | -0.002   | -0.027 | 0.000  |
| 134      | 1302.69                 | 0.133                   | 0.000    | -0.001 | -106.410                | -1.288   | 0.659  | -0.001 |
| 135      | 1333.48                 | 85.840                  | -0.819   | -0.519 | -42.608                 | -0.202   | 0.258  | -0.279 |
| 136      | 1337.26                 | 0.373                   | 0.000    | -0.002 | -29.190                 | -0.094   | 0.176  | -0.002 |
| 137      | 1365.13                 | 0.760                   | 0.000    | -0.004 | -22.710                 | -0.056   | 0.134  | -0.003 |
| 138      | 1381.26                 | 2.729                   | -0.001   | -0.016 | 25.513                  | -0.070   | -0.149 | -0.009 |
| 139      | 1381.60                 | 0.685                   | 0.000    | -0.004 | 38.494                  | -0.159   | -0.225 | -0.002 |
| 140      | 1382.10                 | 32.828                  | -0.116   | -0.192 | -20.309                 | -0.044   | 0.119  | -0.109 |
| 141      | 1382.69                 | 1.590                   | 0.000    | -0.009 | -19.147                 | -0.039   | 0.112  | -0.006 |
| 142      | 1382.75                 | 1.838                   | 0.000    | -0.011 | 2.682                   | -0.001   | -0.016 | -0.007 |
| 143      | 1383.08                 | 0.231                   | 0.000    | -0.001 | 41.391                  | -0.184   | -0.241 | 0.000  |
| 144      | 1383.10                 | 3.046                   | -0.001   | -0.018 | -3.768                  | -0.002   | 0.022  | -0.010 |
| 145      | 1389.89                 | 0.706                   | 0.000    | -0.004 | 2.738                   | -0.001   | -0.016 | -0.002 |
| 146      | 1408.39                 | -39.643                 | -0.165   | 0.227  | 50.989                  | -0.274   | -0.292 | 0.158  |
| 147      | 1413.70                 | -4.266                  | -0.002   | 0.024  | 34.917                  | -0.128   | -0.199 | 0.014  |
| 148      | 1413.92                 | -1.178                  | 0.000    | 0.007  | -19.884                 | -0.041   | 0.113  | 0.004  |
| 149      | 1415.75                 | 8.455                   | -0.007   | -0.048 | 14.475                  | -0.022   | -0.082 | -0.028 |
| 150      | 1415.95                 | 48.879                  | -0.250   | -0.278 | -24.972                 | -0.065   | 0.142  | -0.171 |
| 151      | 1420.74                 | -3.569                  | -0.001   | 0.020  | -40.475                 | -0.171   | 0.230  | 0.012  |
| 152      | 1426.35                 | 0.246                   | 0.000    | -0.001 | 47.387                  | -0.233   | -0.268 | -0.001 |
| 153      | 1428.84                 | -0.307                  | 0.000    | 0.002  | -1.905                  | 0.000    | 0.011  | 0.000  |
| 154      | 1437.07                 | 172.460                 | -3.067   | -0.968 | -5.853                  | -0.004   | 0.033  | -0.579 |

Continued on next page



— Continued from previous page

| $\alpha$ | Freq. /cm <sup>-1</sup> | $\kappa_{\alpha}$ / meV | dE / meV | dQ     | $\kappa_{\alpha}$ / meV | dE / meV | dQ     | $\xi$  |
|----------|-------------------------|-------------------------|----------|--------|-------------------------|----------|--------|--------|
| 155      | 1461.88                 | 32.229                  | -0.105   | -0.178 | 16.777                  | -0.029   | -0.093 | -0.101 |
| 156      | 1467.06                 | -2.575                  | -0.001   | 0.014  | -24.456                 | -0.060   | 0.134  | 0.009  |
| 157      | 1470.16                 | 0.098                   | 0.000    | -0.001 | 8.209                   | -0.007   | -0.045 | 0.000  |
| 158      | 1470.37                 | 0.235                   | 0.000    | -0.001 | 23.341                  | -0.055   | -0.128 | -0.001 |
| 159      | 1470.65                 | -0.092                  | 0.000    | 0.001  | -20.841                 | -0.044   | 0.114  | 0.000  |
| 160      | 1470.75                 | 0.030                   | 0.000    | 0.000  | 24.699                  | -0.061   | -0.135 | 0.000  |
| 161      | 1472.68                 | -0.280                  | 0.000    | 0.002  | 30.504                  | -0.094   | -0.167 | 0.001  |
| 162      | 1472.76                 | -0.474                  | 0.000    | 0.003  | 46.283                  | -0.216   | -0.253 | 0.002  |
| 163      | 1473.16                 | 0.284                   | 0.000    | -0.002 | 25.088                  | -0.063   | -0.137 | -0.001 |
| 164      | 1473.32                 | -0.147                  | 0.000    | 0.001  | -81.327                 | -0.665   | 0.445  | 0.001  |
| 165      | 1474.38                 | -0.382                  | 0.000    | 0.002  | -31.616                 | -0.100   | 0.173  | 0.001  |
| 166      | 1476.12                 | 0.091                   | 0.000    | 0.000  | 9.513                   | -0.009   | -0.052 | 0.000  |
| 167      | 1478.91                 | 0.177                   | 0.000    | -0.001 | 74.536                  | -0.557   | -0.406 | 0.001  |
| 168      | 1480.79                 | -6.751                  | -0.005   | 0.037  | 58.325                  | -0.340   | -0.318 | 0.023  |
| 169      | 1485.26                 | -0.213                  | 0.000    | 0.001  | -62.320                 | -0.388   | 0.338  | 0.001  |
| 170      | 1486.03                 | 0.383                   | 0.000    | -0.002 | -129.533                | -1.673   | 0.703  | -0.001 |
| 171      | 1494.75                 | -0.359                  | 0.000    | 0.002  | -44.785                 | -0.199   | 0.242  | 0.001  |
| 172      | 1494.81                 | -0.136                  | 0.000    | 0.001  | -13.030                 | -0.017   | 0.070  | 0.001  |
| 173      | 1494.91                 | 0.112                   | 0.000    | -0.001 | -8.274                  | -0.007   | 0.045  | 0.000  |
| 174      | 1494.95                 | 0.252                   | 0.000    | -0.001 | 9.893                   | -0.010   | -0.053 | 0.001  |
| 175      | 1496.87                 | 0.005                   | 0.000    | 0.000  | -35.730                 | -0.126   | 0.193  | 0.000  |
| 176      | 1498.18                 | 0.241                   | 0.000    | -0.001 | 54.959                  | -0.299   | -0.296 | -0.001 |
| 177      | 1498.85                 | 11.095                  | -0.012   | -0.060 | 19.474                  | -0.037   | -0.105 | -0.038 |
| 178      | 1502.51                 | 0.314                   | 0.000    | -0.002 | -11.051                 | -0.012   | 0.059  | -0.001 |
| 179      | 1514.73                 | 3.158                   | -0.001   | -0.017 | 21.787                  | -0.046   | -0.116 | -0.011 |
| 180      | 1514.96                 | 15.947                  | -0.025   | -0.085 | -15.466                 | -0.023   | 0.082  | -0.049 |
| 181      | 1515.02                 | 8.016                   | -0.006   | -0.043 | 21.461                  | -0.045   | -0.114 | -0.032 |
| 182      | 1515.43                 | 0.462                   | 0.000    | -0.002 | 55.242                  | -0.298   | -0.294 | -0.001 |
| 183      | 1545.91                 | -0.025                  | 0.000    | 0.000  | -19.736                 | -0.037   | 0.103  | 0.000  |
| 184      | 1568.47                 | 1.365                   | 0.000    | -0.007 | -18.988                 | -0.034   | 0.098  | -0.004 |
| 185      | 1633.27                 | 181.472                 | -2.988   | -0.896 | 104.612                 | -0.993   | -0.517 | -0.603 |
| 186      | 1641.96                 | -6.127                  | -0.003   | 0.030  | 9.573                   | -0.008   | -0.047 | 0.021  |
| 187      | 1661.09                 | -76.682                 | -0.525   | 0.372  | 28.190                  | -0.071   | -0.137 | 0.257  |
| 188      | 1669.59                 | 0.896                   | 0.000    | -0.004 | 15.116                  | -0.020   | -0.073 | -0.003 |
| 189      | 1677.42                 | 0.797                   | 0.000    | -0.004 | 8.581                   | -0.007   | -0.041 | -0.003 |
| 190      | 1690.87                 | -1.586                  | 0.000    | 0.008  | -4.728                  | -0.002   | 0.023  | 0.006  |
| 191      | 3039.23                 | -0.044                  | 0.000    | 0.000  | -68.534                 | -0.229   | 0.182  | 0.001  |
| 192      | 3039.29                 | 0.005                   | 0.000    | 0.000  | 6.753                   | -0.002   | -0.018 | 0.000  |
| 193      | 3039.36                 | 0.018                   | 0.000    | 0.000  | 25.061                  | -0.031   | -0.067 | -0.001 |
| 194      | 3039.38                 | 0.142                   | 0.000    | 0.000  | -75.551                 | -0.278   | 0.200  | -0.002 |
| 195      | 3040.60                 | -0.009                  | 0.000    | 0.000  | -42.109                 | -0.086   | 0.112  | 0.000  |
| 196      | 3040.64                 | 0.015                   | 0.000    | 0.000  | -18.776                 | -0.017   | 0.050  | 0.000  |
| 197      | 3040.65                 | -0.008                  | 0.000    | 0.000  | 46.253                  | -0.104   | -0.123 | 0.000  |
| 198      | 3040.72                 | 0.004                   | 0.000    | 0.000  | 35.049                  | -0.060   | -0.093 | 0.000  |

Continued on next page



— Continued from previous page

| $\alpha$ | Freq. /cm <sup>-1</sup> | $\kappa_\alpha$ / meV | dE / meV | dQ     | $\kappa_\alpha$ / meV | dE / meV | dQ     | $\xi$  |
|----------|-------------------------|-----------------------|----------|--------|-----------------------|----------|--------|--------|
| 199      | 3046.44                 | -0.027                | 0.000    | 0.000  | 8.628                 | -0.004   | -0.023 | 0.000  |
| 200      | 3046.49                 | -0.053                | 0.000    | 0.000  | -80.254               | -0.313   | 0.212  | 0.001  |
| 201      | 3046.57                 | 0.188                 | 0.000    | 0.000  | -134.900              | -0.885   | 0.357  | 0.004  |
| 202      | 3046.62                 | -0.398                | 0.000    | 0.001  | 182.764               | -1.625   | -0.484 | 0.009  |
| 203      | 3112.54                 | 0.513                 | 0.000    | -0.001 | -44.395               | -0.094   | 0.115  | 0.002  |
| 204      | 3112.61                 | 0.263                 | 0.000    | -0.001 | 152.149               | -1.102   | -0.394 | -0.001 |
| 205      | 3112.66                 | 0.031                 | 0.000    | 0.000  | 172.075               | -1.410   | -0.446 | -0.001 |
| 206      | 3112.69                 | -1.757                | 0.000    | 0.005  | -16.753               | -0.013   | 0.043  | -0.008 |
| 207      | 3115.49                 | 0.009                 | 0.000    | 0.000  | -128.763              | -0.789   | 0.333  | 0.000  |
| 208      | 3115.51                 | 0.010                 | 0.000    | 0.000  | -38.412               | -0.070   | 0.099  | 0.000  |
| 209      | 3115.55                 | -0.014                | 0.000    | 0.000  | 48.636                | -0.113   | -0.126 | 0.000  |
| 210      | 3115.59                 | -0.014                | 0.000    | 0.000  | 46.130                | -0.101   | -0.119 | 0.000  |
| 211      | 3120.29                 | 0.018                 | 0.000    | 0.000  | -68.323               | -0.222   | 0.177  | 0.000  |
| 212      | 3120.37                 | 0.031                 | 0.000    | 0.000  | 11.274                | -0.006   | -0.029 | 0.000  |
| 213      | 3120.40                 | 0.002                 | 0.000    | 0.000  | -14.417               | -0.010   | 0.037  | 0.000  |
| 214      | 3120.83                 | -1.420                | 0.000    | 0.004  | -61.419               | -0.179   | 0.159  | 0.000  |
| 215      | 3122.04                 | -0.015                | 0.000    | 0.000  | -154.998              | -1.140   | 0.400  | 0.000  |
| 216      | 3122.05                 | 0.014                 | 0.000    | 0.000  | -12.578               | -0.008   | 0.032  | 0.000  |
| 217      | 3122.06                 | -0.021                | 0.000    | 0.000  | -65.793               | -0.205   | 0.170  | 0.000  |
| 218      | 3122.07                 | 0.005                 | 0.000    | 0.000  | 17.095                | -0.014   | -0.044 | 0.000  |
| 219      | 3126.02                 | 0.027                 | 0.000    | 0.000  | -52.097               | -0.129   | 0.134  | 0.000  |
| 220      | 3126.06                 | 0.008                 | 0.000    | 0.000  | -80.763               | -0.309   | 0.208  | 0.000  |
| 221      | 3126.11                 | 0.035                 | 0.000    | 0.000  | -89.627               | -0.381   | 0.231  | 0.000  |
| 222      | 3126.11                 | -0.006                | 0.000    | 0.000  | 19.080                | -0.017   | -0.049 | 0.000  |
| 223      | 3127.30                 | -0.210                | 0.000    | 0.001  | -56.975               | -0.154   | 0.147  | 0.001  |
| 224      | 3127.36                 | -0.073                | 0.000    | 0.000  | 31.519                | -0.047   | -0.081 | 0.000  |
| 225      | 3127.53                 | 0.521                 | 0.000    | -0.001 | 40.542                | -0.078   | -0.105 | 0.003  |
| 226      | 3127.58                 | -1.106                | 0.000    | 0.003  | 7.675                 | -0.003   | -0.020 | 0.007  |
| 227      | 3201.25                 | -0.102                | 0.000    | 0.000  | -16.560               | -0.013   | 0.042  | 0.000  |
| 228      | 3201.59                 | -0.037                | 0.000    | 0.000  | -6.733                | -0.002   | 0.017  | 0.000  |
| 229      | 3206.04                 | 0.697                 | 0.000    | -0.002 | 5.231                 | -0.001   | -0.013 | -0.003 |
| 230      | 3206.23                 | -5.382                | -0.001   | 0.014  | 112.017               | -0.580   | -0.282 | 0.017  |
| 231      | 3212.56                 | 0.009                 | 0.000    | 0.000  | 11.000                | -0.006   | -0.028 | 0.000  |
| 232      | 3212.72                 | 0.126                 | 0.000    | 0.000  | 46.501                | -0.100   | -0.117 | 0.000  |
| 233      | 3222.07                 | -7.598                | -0.003   | 0.019  | -25.169               | -0.029   | 0.063  | 0.026  |
| 234      | 3222.15                 | 10.263                | -0.005   | -0.026 | 74.969                | -0.259   | -0.188 | -0.032 |

**Table S8:** LVC Analysis for T2 of TBPe.

| $\alpha$ | Freq. /cm <sup>-1</sup> | $\kappa_\alpha$       |          |        | $\kappa_\alpha^*$     |          |        | $\xi$ |
|----------|-------------------------|-----------------------|----------|--------|-----------------------|----------|--------|-------|
|          |                         | $\kappa_\alpha$ / meV | dE / meV | dQ     | $\kappa_\alpha$ / meV | dE / meV | dQ     |       |
| 1        | 19.71                   | 0.176                 | 0.000    | -0.072 | -0.042                | 0.000    | 0.017  | 0.001 |
| 2        | 25.22                   | 0.055                 | 0.000    | -0.018 | 1.591                 | -0.015   | -0.509 | 0.000 |
| 3        | 29.15                   | -0.001                | 0.000    | 0.000  | 0.775                 | -0.003   | -0.215 | 0.000 |

Continued on next page

— Continued from previous page

| $\alpha$ | Freq. /cm <sup>-1</sup> | $\kappa_\alpha$ / meV | dE / meV | dQ     | $\kappa_\alpha$ / meV | dE / meV | dQ     | $\xi$  |
|----------|-------------------------|-----------------------|----------|--------|-----------------------|----------|--------|--------|
| 4        | 30.92                   | -0.033                | 0.000    | 0.009  | -1.321                | -0.008   | 0.345  | 0.000  |
| 5        | 31.41                   | 0.052                 | 0.000    | -0.013 | -0.665                | -0.002   | 0.171  | 0.000  |
| 6        | 48.26                   | 0.032                 | 0.000    | -0.005 | -0.352                | 0.000    | 0.059  | 0.000  |
| 7        | 72.92                   | -0.001                | 0.000    | 0.000  | -3.823                | -0.030   | 0.423  | 0.000  |
| 8        | 80.77                   | -0.052                | 0.000    | 0.005  | 0.543                 | -0.001   | -0.054 | 0.000  |
| 9        | 91.43                   | 1.641                 | -0.004   | -0.145 | -3.093                | -0.016   | 0.273  | 0.011  |
| 10       | 94.40                   | 0.058                 | 0.000    | -0.005 | 0.844                 | -0.001   | -0.072 | 0.000  |
| 11       | 115.51                  | -0.030                | 0.000    | 0.002  | -6.759                | -0.059   | 0.472  | 0.000  |
| 12       | 122.18                  | -0.152                | 0.000    | 0.010  | -1.295                | -0.002   | 0.086  | 0.000  |
| 13       | 122.91                  | -0.073                | 0.000    | 0.005  | 2.479                 | -0.007   | -0.163 | 0.000  |
| 14       | 153.00                  | -0.094                | 0.000    | 0.005  | 8.673                 | -0.073   | -0.457 | -0.001 |
| 15       | 166.89                  | 0.090                 | 0.000    | -0.004 | 2.647                 | -0.006   | -0.128 | 0.001  |
| 16       | 201.34                  | -0.045                | 0.000    | 0.002  | 0.419                 | 0.000    | -0.017 | 0.000  |
| 17       | 223.58                  | -0.029                | 0.000    | 0.001  | 10.057                | -0.067   | -0.363 | 0.000  |
| 18       | 228.79                  | -10.659               | -0.074   | 0.376  | -0.428                | 0.000    | 0.015  | 0.054  |
| 19       | 238.58                  | 0.007                 | 0.000    | 0.000  | -4.051                | -0.010   | 0.137  | 0.000  |
| 20       | 238.92                  | 0.142                 | 0.000    | -0.005 | -2.327                | -0.003   | 0.079  | 0.000  |
| 21       | 240.51                  | -0.103                | 0.000    | 0.003  | 0.369                 | 0.000    | -0.012 | 0.001  |
| 22       | 243.91                  | 0.083                 | 0.000    | -0.003 | 7.549                 | -0.035   | -0.250 | 0.000  |
| 23       | 248.58                  | -0.224                | 0.000    | 0.007  | 7.494                 | -0.033   | -0.243 | 0.001  |
| 24       | 252.51                  | -0.168                | 0.000    | 0.005  | 1.691                 | -0.002   | -0.054 | 0.000  |
| 25       | 253.20                  | -0.066                | 0.000    | 0.002  | -0.016                | 0.000    | 0.001  | 0.000  |
| 26       | 258.34                  | 4.169                 | -0.010   | -0.130 | -21.805               | -0.273   | 0.681  | 0.019  |
| 27       | 259.22                  | 8.008                 | -0.037   | -0.249 | 2.060                 | -0.002   | -0.064 | -0.035 |
| 28       | 281.31                  | 0.036                 | 0.000    | -0.001 | -7.642                | -0.031   | 0.219  | 0.000  |
| 29       | 285.32                  | 0.035                 | 0.000    | -0.001 | -0.462                | 0.000    | 0.013  | 0.001  |
| 30       | 289.15                  | -0.167                | 0.000    | 0.005  | -6.511                | -0.022   | 0.182  | 0.000  |
| 31       | 290.74                  | -0.318                | 0.000    | 0.009  | -0.283                | 0.000    | 0.008  | -0.001 |
| 32       | 292.88                  | -7.159                | -0.026   | 0.197  | -1.977                | -0.002   | 0.054  | -0.023 |
| 33       | 315.20                  | -0.107                | 0.000    | 0.003  | 6.819                 | -0.022   | -0.174 | 0.000  |
| 34       | 322.92                  | 0.084                 | 0.000    | -0.002 | 1.676                 | -0.001   | -0.042 | 0.000  |
| 35       | 330.98                  | 0.088                 | 0.000    | -0.002 | 0.765                 | 0.000    | -0.019 | 0.000  |
| 36       | 331.92                  | -0.184                | 0.000    | 0.004  | 0.576                 | 0.000    | -0.014 | -0.001 |
| 37       | 336.73                  | -0.148                | 0.000    | 0.004  | -7.156                | -0.023   | 0.171  | 0.001  |
| 38       | 336.98                  | 0.115                 | 0.000    | -0.003 | 0.963                 | 0.000    | -0.023 | 0.000  |
| 39       | 337.73                  | -0.050                | 0.000    | 0.001  | -1.329                | -0.001   | 0.032  | 0.000  |
| 40       | 342.64                  | 0.088                 | 0.000    | -0.002 | 2.537                 | -0.003   | -0.060 | 0.000  |
| 41       | 343.67                  | -0.040                | 0.000    | 0.001  | 3.888                 | -0.007   | -0.091 | 0.000  |
| 42       | 349.09                  | -0.079                | 0.000    | 0.002  | -3.046                | -0.004   | 0.070  | 0.000  |
| 43       | 359.10                  | -0.249                | 0.000    | 0.006  | -1.555                | -0.001   | 0.035  | -0.001 |
| 44       | 365.63                  | 0.422                 | 0.000    | -0.009 | 1.722                 | -0.001   | -0.038 | 0.001  |
| 45       | 374.78                  | -18.556               | -0.136   | 0.399  | 3.446                 | -0.005   | -0.074 | -0.080 |
| 46       | 397.68                  | 0.028                 | 0.000    | -0.001 | -8.682                | -0.028   | 0.176  | 0.000  |
| 47       | 398.76                  | -0.008                | 0.000    | 0.000  | -4.353                | -0.007   | 0.088  | 0.000  |

Continued on next page

— Continued from previous page

| $\alpha$ | Freq. /cm <sup>-1</sup> | $\kappa_{\alpha}$ / meV | dE / meV | dQ     | $\kappa_{\alpha}$ / meV | dE / meV | dQ     | $\xi$  |
|----------|-------------------------|-------------------------|----------|--------|-------------------------|----------|--------|--------|
| 48       | 402.17                  | 0.096                   | 0.000    | -0.002 | 3.847                   | -0.005   | -0.077 | 0.000  |
| 49       | 411.18                  | 0.075                   | 0.000    | -0.001 | 13.344                  | -0.064   | -0.262 | -0.001 |
| 50       | 414.21                  | 0.063                   | 0.000    | -0.001 | -4.529                  | -0.007   | 0.088  | 0.000  |
| 51       | 427.83                  | -0.541                  | 0.000    | 0.010  | -4.348                  | -0.007   | 0.082  | 0.002  |
| 52       | 435.71                  | 22.707                  | -0.175   | -0.420 | -23.029                 | -0.180   | 0.426  | -0.093 |
| 53       | 468.07                  | 0.023                   | 0.000    | 0.000  | -14.696                 | -0.068   | 0.253  | 0.000  |
| 54       | 485.28                  | -0.081                  | 0.000    | 0.001  | -17.210                 | -0.090   | 0.286  | 0.001  |
| 55       | 507.84                  | 14.942                  | -0.065   | -0.237 | 1.799                   | -0.001   | -0.029 | -0.077 |
| 56       | 511.26                  | -0.876                  | 0.000    | 0.014  | 15.423                  | -0.069   | -0.243 | 0.005  |
| 57       | 521.76                  | -0.181                  | 0.000    | 0.003  | 26.006                  | -0.192   | -0.402 | 0.001  |
| 58       | 525.67                  | -0.010                  | 0.000    | 0.000  | -6.905                  | -0.013   | 0.106  | 0.000  |
| 59       | 561.37                  | -0.104                  | 0.000    | 0.001  | 24.592                  | -0.160   | -0.353 | 0.000  |
| 60       | 563.93                  | -3.977                  | -0.004   | 0.057  | -0.875                  | 0.000    | 0.013  | 0.012  |
| 61       | 564.55                  | 7.324                   | -0.014   | -0.105 | 21.761                  | -0.124   | -0.311 | -0.022 |
| 62       | 578.88                  | -0.237                  | 0.000    | 0.003  | 15.332                  | -0.060   | -0.214 | 0.001  |
| 63       | 618.44                  | -0.052                  | 0.000    | 0.001  | -17.833                 | -0.076   | 0.233  | 0.000  |
| 64       | 643.48                  | -0.019                  | 0.000    | 0.000  | -11.130                 | -0.029   | 0.140  | 0.000  |
| 65       | 651.09                  | 0.073                   | 0.000    | -0.001 | -1.679                  | -0.001   | 0.021  | 0.000  |
| 66       | 660.36                  | -0.042                  | 0.000    | 0.001  | 10.152                  | -0.023   | -0.124 | 0.000  |
| 67       | 663.17                  | -0.056                  | 0.000    | 0.001  | 18.783                  | -0.079   | -0.228 | 0.000  |
| 68       | 679.98                  | -0.081                  | 0.000    | 0.001  | -17.120                 | -0.064   | 0.203  | 0.001  |
| 69       | 681.57                  | 0.101                   | 0.000    | -0.001 | 9.940                   | -0.021   | -0.118 | -0.001 |
| 70       | 691.69                  | 8.859                   | -0.017   | -0.103 | 9.667                   | -0.020   | -0.113 | -0.073 |
| 71       | 692.91                  | 0.596                   | 0.000    | -0.007 | 10.957                  | -0.026   | -0.128 | -0.005 |
| 72       | 698.96                  | 0.098                   | 0.000    | -0.001 | -4.490                  | -0.004   | 0.052  | -0.001 |
| 73       | 713.38                  | -0.102                  | 0.000    | 0.001  | -7.517                  | -0.012   | 0.085  | 0.001  |
| 74       | 821.38                  | -0.067                  | 0.000    | 0.001  | 0.655                   | 0.000    | -0.006 | 0.000  |
| 75       | 823.62                  | -0.195                  | 0.000    | 0.002  | -2.902                  | -0.002   | 0.028  | 0.000  |
| 76       | 824.47                  | -4.669                  | -0.004   | 0.046  | 5.296                   | -0.005   | -0.052 | -0.012 |
| 77       | 826.36                  | 0.218                   | 0.000    | -0.002 | -10.012                 | -0.018   | 0.098  | 0.000  |
| 78       | 835.58                  | -0.141                  | 0.000    | 0.001  | -10.357                 | -0.019   | 0.100  | 0.000  |
| 79       | 846.60                  | 0.081                   | 0.000    | -0.001 | -7.178                  | -0.009   | 0.068  | 0.000  |
| 80       | 855.57                  | 0.014                   | 0.000    | 0.000  | -1.285                  | 0.000    | 0.012  | 0.000  |
| 81       | 877.21                  | -0.081                  | 0.000    | 0.001  | -50.789                 | -0.436   | 0.467  | 0.000  |
| 82       | 879.05                  | -0.012                  | 0.000    | 0.000  | -43.774                 | -0.323   | 0.402  | 0.000  |
| 83       | 898.67                  | -0.184                  | 0.000    | 0.002  | 30.581                  | -0.154   | -0.274 | 0.000  |
| 84       | 900.60                  | 0.078                   | 0.000    | -0.001 | -3.157                  | -0.002   | 0.028  | 0.001  |
| 85       | 902.45                  | 0.047                   | 0.000    | 0.000  | 33.974                  | -0.190   | -0.304 | 0.000  |
| 86       | 905.76                  | -0.019                  | 0.000    | 0.000  | -4.352                  | -0.003   | 0.039  | 0.000  |
| 87       | 926.72                  | 0.048                   | 0.000    | 0.000  | 46.234                  | -0.342   | -0.402 | 0.000  |
| 88       | 928.27                  | -0.141                  | 0.000    | 0.001  | 39.741                  | -0.252   | -0.345 | 0.000  |
| 89       | 936.91                  | 0.084                   | 0.000    | -0.001 | -2.944                  | -0.001   | 0.025  | 0.000  |
| 90       | 943.49                  | 0.070                   | 0.000    | -0.001 | -2.483                  | -0.001   | 0.021  | -0.001 |
| 91       | 943.60                  | 0.029                   | 0.000    | 0.000  | 14.744                  | -0.034   | -0.126 | 0.000  |

Continued on next page

— Continued from previous page

| $\alpha$ | Freq. /cm <sup>-1</sup> | $\kappa_{\alpha}$ / meV | dE / meV | dQ     | $\kappa_{\alpha}$ / meV | dE / meV | dQ     | $\xi$  |
|----------|-------------------------|-------------------------|----------|--------|-------------------------|----------|--------|--------|
| 92       | 943.77                  | 0.044                   | 0.000    | 0.000  | 40.989                  | -0.264   | -0.350 | 0.000  |
| 93       | 943.96                  | 0.066                   | 0.000    | -0.001 | 13.339                  | -0.028   | -0.114 | 0.000  |
| 94       | 946.92                  | -0.910                  | 0.000    | 0.008  | 32.439                  | -0.165   | -0.276 | 0.005  |
| 95       | 947.13                  | 0.055                   | 0.000    | 0.000  | -86.467                 | -1.170   | 0.736  | -0.001 |
| 96       | 947.24                  | 0.107                   | 0.000    | -0.001 | 10.296                  | -0.017   | -0.088 | 0.000  |
| 97       | 948.23                  | -0.090                  | 0.000    | 0.001  | -15.051                 | -0.035   | 0.128  | 0.000  |
| 98       | 949.17                  | 0.039                   | 0.000    | 0.000  | -37.621                 | -0.221   | 0.320  | 0.000  |
| 99       | 949.22                  | 0.018                   | 0.000    | 0.000  | 16.132                  | -0.041   | -0.137 | 0.000  |
| 100      | 949.44                  | -0.021                  | 0.000    | 0.000  | 9.584                   | -0.014   | -0.081 | 0.000  |
| 101      | 949.50                  | 0.024                   | 0.000    | 0.000  | 29.359                  | -0.135   | -0.249 | 0.000  |
| 102      | 972.23                  | -6.251                  | -0.006   | 0.052  | -4.396                  | -0.003   | 0.036  | 0.020  |
| 103      | 995.69                  | -0.111                  | 0.000    | 0.001  | -1.026                  | 0.000    | 0.008  | 0.000  |
| 104      | 1006.22                 | -0.160                  | 0.000    | 0.001  | 7.602                   | -0.009   | -0.061 | 0.000  |
| 105      | 1031.64                 | -10.172                 | -0.015   | 0.080  | -13.305                 | -0.025   | 0.104  | 0.039  |
| 106      | 1036.50                 | -0.052                  | 0.000    | 0.000  | -8.961                  | -0.011   | 0.070  | 0.000  |
| 107      | 1037.46                 | -0.042                  | 0.000    | 0.000  | 17.302                  | -0.043   | -0.135 | 0.000  |
| 108      | 1040.53                 | -0.055                  | 0.000    | 0.000  | 22.932                  | -0.075   | -0.178 | 0.000  |
| 109      | 1041.73                 | -0.010                  | 0.000    | 0.000  | -26.336                 | -0.099   | 0.204  | 0.000  |
| 110      | 1041.84                 | -0.057                  | 0.000    | 0.000  | 10.588                  | -0.016   | -0.082 | 0.000  |
| 111      | 1042.08                 | 0.063                   | 0.000    | 0.000  | 12.360                  | -0.022   | -0.096 | 0.000  |
| 112      | 1042.19                 | 0.110                   | 0.000    | -0.001 | 14.400                  | -0.029   | -0.111 | 0.000  |
| 113      | 1075.14                 | 33.756                  | -0.157   | -0.253 | -1.403                  | 0.000    | 0.011  | -0.106 |
| 114      | 1094.17                 | -0.242                  | 0.000    | 0.002  | 1.391                   | 0.000    | -0.010 | 0.001  |
| 115      | 1139.66                 | -0.110                  | 0.000    | 0.001  | 15.473                  | -0.031   | -0.110 | 0.000  |
| 116      | 1143.22                 | -0.186                  | 0.000    | 0.001  | -9.287                  | -0.011   | 0.066  | -0.001 |
| 117      | 1161.39                 | 39.126                  | -0.195   | -0.272 | 1.289                   | 0.000    | -0.009 | -0.128 |
| 118      | 1196.98                 | -0.373                  | 0.000    | 0.003  | 3.464                   | -0.001   | -0.023 | 0.001  |
| 119      | 1219.19                 | -0.605                  | 0.000    | 0.004  | -4.317                  | -0.002   | 0.029  | 0.003  |
| 120      | 1239.25                 | 0.071                   | 0.000    | 0.000  | 1.416                   | 0.000    | -0.009 | 0.000  |
| 121      | 1239.30                 | -0.058                  | 0.000    | 0.000  | -31.298                 | -0.117   | 0.204  | 0.000  |
| 122      | 1239.53                 | -0.059                  | 0.000    | 0.000  | 23.618                  | -0.067   | -0.154 | 0.000  |
| 123      | 1239.64                 | 0.008                   | 0.000    | 0.000  | -2.413                  | -0.001   | 0.016  | 0.000  |
| 124      | 1239.89                 | 0.053                   | 0.000    | 0.000  | 32.818                  | -0.129   | -0.213 | 0.000  |
| 125      | 1242.84                 | -0.186                  | 0.000    | 0.001  | 13.492                  | -0.022   | -0.088 | 0.000  |
| 126      | 1245.47                 | -0.049                  | 0.000    | 0.000  | 12.177                  | -0.018   | -0.079 | -0.001 |
| 127      | 1246.17                 | -1.965                  | 0.000    | 0.013  | -22.306                 | -0.059   | 0.144  | -0.004 |
| 128      | 1246.38                 | 16.219                  | -0.031   | -0.105 | -16.009                 | -0.030   | 0.104  | -0.037 |
| 129      | 1249.01                 | -0.753                  | 0.000    | 0.005  | 1.010                   | 0.000    | -0.007 | 0.001  |
| 130      | 1251.58                 | 0.114                   | 0.000    | -0.001 | 16.190                  | -0.031   | -0.104 | 0.000  |
| 131      | 1286.36                 | -16.751                 | -0.032   | 0.105  | -51.937                 | -0.311   | 0.326  | 0.078  |
| 132      | 1290.87                 | 0.351                   | 0.000    | -0.002 | -47.696                 | -0.261   | 0.298  | -0.001 |
| 133      | 1301.27                 | -0.092                  | 0.000    | 0.001  | 45.628                  | -0.237   | -0.283 | 0.000  |
| 134      | 1302.69                 | 0.289                   | 0.000    | -0.002 | -0.108                  | 0.000    | 0.001  | 0.000  |
| 135      | 1333.48                 | 70.975                  | -0.560   | -0.429 | -54.819                 | -0.334   | 0.332  | -0.323 |

Continued on next page

— Continued from previous page

| $\alpha$ | Freq. /cm <sup>-1</sup> | $\kappa_{\alpha}$ / meV | dE / meV | dQ     | $\kappa_{\alpha}$ / meV | dE / meV | dQ     | $\xi$  |
|----------|-------------------------|-------------------------|----------|--------|-------------------------|----------|--------|--------|
| 136      | 1337.26                 | 0.519                   | 0.000    | -0.003 | -12.604                 | -0.018   | 0.076  | -0.003 |
| 137      | 1365.13                 | 0.451                   | 0.000    | -0.003 | -7.455                  | -0.006   | 0.044  | -0.002 |
| 138      | 1381.26                 | 3.118                   | -0.001   | -0.018 | -16.792                 | -0.030   | 0.098  | -0.012 |
| 139      | 1381.60                 | 0.672                   | 0.000    | -0.004 | 15.711                  | -0.026   | -0.092 | -0.002 |
| 140      | 1382.10                 | 36.562                  | -0.143   | -0.213 | 5.002                   | -0.003   | -0.029 | -0.142 |
| 141      | 1382.69                 | 1.419                   | 0.000    | -0.008 | -9.329                  | -0.009   | 0.054  | -0.007 |
| 142      | 1382.75                 | 2.138                   | 0.000    | -0.012 | -10.460                 | -0.012   | 0.061  | -0.009 |
| 143      | 1383.08                 | 0.508                   | 0.000    | -0.003 | 31.765                  | -0.108   | -0.185 | -0.001 |
| 144      | 1383.10                 | 3.420                   | -0.001   | -0.020 | 11.960                  | -0.015   | -0.070 | -0.013 |
| 145      | 1389.89                 | 0.139                   | 0.000    | -0.001 | -18.012                 | -0.035   | 0.105  | 0.000  |
| 146      | 1408.39                 | -86.327                 | -0.784   | 0.494  | 34.700                  | -0.127   | -0.199 | 0.324  |
| 147      | 1413.70                 | -1.351                  | 0.000    | 0.008  | 35.439                  | -0.132   | -0.202 | 0.003  |
| 148      | 1413.92                 | -1.107                  | 0.000    | 0.006  | -30.139                 | -0.095   | 0.172  | 0.004  |
| 149      | 1415.75                 | 8.139                   | -0.007   | -0.046 | -29.517                 | -0.091   | 0.168  | -0.027 |
| 150      | 1415.95                 | 45.494                  | -0.217   | -0.259 | 14.182                  | -0.021   | -0.081 | -0.161 |
| 151      | 1420.74                 | 1.592                   | 0.000    | -0.009 | -18.041                 | -0.034   | 0.102  | -0.008 |
| 152      | 1426.35                 | 0.144                   | 0.000    | -0.001 | 14.796                  | -0.023   | -0.084 | -0.001 |
| 153      | 1428.84                 | 0.204                   | 0.000    | -0.001 | -15.563                 | -0.025   | 0.088  | -0.001 |
| 154      | 1437.07                 | 14.669                  | -0.022   | -0.082 | -16.270                 | -0.027   | 0.091  | 0.020  |
| 155      | 1461.88                 | 47.250                  | -0.226   | -0.261 | 11.274                  | -0.013   | -0.062 | -0.146 |
| 156      | 1467.06                 | -3.024                  | -0.001   | 0.017  | 11.707                  | -0.014   | -0.064 | 0.010  |
| 157      | 1470.16                 | -0.582                  | 0.000    | 0.003  | 10.372                  | -0.011   | -0.057 | 0.002  |
| 158      | 1470.37                 | -0.333                  | 0.000    | 0.002  | -3.118                  | -0.001   | 0.017  | 0.001  |
| 159      | 1470.65                 | 0.000                   | 0.000    | 0.000  | -8.839                  | -0.008   | 0.048  | 0.000  |
| 160      | 1470.75                 | 0.072                   | 0.000    | 0.000  | 12.482                  | -0.016   | -0.068 | 0.000  |
| 161      | 1472.68                 | -0.105                  | 0.000    | 0.001  | 19.871                  | -0.040   | -0.109 | 0.000  |
| 162      | 1472.76                 | -0.299                  | 0.000    | 0.002  | 0.380                   | 0.000    | -0.002 | 0.001  |
| 163      | 1473.16                 | 0.218                   | 0.000    | -0.001 | 20.691                  | -0.043   | -0.113 | -0.001 |
| 164      | 1473.32                 | -0.081                  | 0.000    | 0.000  | -65.225                 | -0.428   | 0.357  | 0.000  |
| 165      | 1474.38                 | 0.035                   | 0.000    | 0.000  | 3.808                   | -0.001   | -0.021 | 0.000  |
| 166      | 1476.12                 | 0.035                   | 0.000    | 0.000  | 34.115                  | -0.117   | -0.186 | 0.000  |
| 167      | 1478.91                 | -0.451                  | 0.000    | 0.002  | 66.654                  | -0.445   | -0.364 | -0.001 |
| 168      | 1480.79                 | -21.789                 | -0.048   | 0.119  | 30.335                  | -0.092   | -0.165 | 0.070  |
| 169      | 1485.26                 | -0.452                  | 0.000    | 0.002  | -59.133                 | -0.349   | 0.321  | 0.002  |
| 170      | 1486.03                 | -0.049                  | 0.000    | 0.000  | -26.372                 | -0.069   | 0.143  | 0.000  |
| 171      | 1494.75                 | -0.014                  | 0.000    | 0.000  | 32.245                  | -0.103   | -0.174 | 0.000  |
| 172      | 1494.81                 | -0.049                  | 0.000    | 0.000  | 6.242                   | -0.004   | -0.034 | 0.000  |
| 173      | 1494.91                 | 0.085                   | 0.000    | 0.000  | 15.779                  | -0.025   | -0.085 | 0.000  |
| 174      | 1494.95                 | 0.139                   | 0.000    | -0.001 | 45.738                  | -0.207   | -0.247 | 0.000  |
| 175      | 1496.87                 | 0.183                   | 0.000    | -0.001 | -12.493                 | -0.015   | 0.067  | -0.001 |
| 176      | 1498.18                 | 0.454                   | 0.000    | -0.002 | 44.424                  | -0.195   | -0.239 | -0.002 |
| 177      | 1498.85                 | 18.569                  | -0.034   | -0.100 | -19.813                 | -0.039   | 0.107  | -0.087 |
| 178      | 1502.51                 | 0.109                   | 0.000    | -0.001 | -15.279                 | -0.023   | 0.082  | 0.000  |
| 179      | 1514.73                 | 3.585                   | -0.001   | -0.019 | -8.320                  | -0.007   | 0.044  | -0.015 |

Continued on next page

— Continued from previous page

| $\alpha$ | Freq. /cm <sup>-1</sup> | $\kappa_\alpha$ / meV | dE / meV | dQ     | $\kappa_\alpha$ / meV | dE / meV | dQ     | $\xi$  |
|----------|-------------------------|-----------------------|----------|--------|-----------------------|----------|--------|--------|
| 180      | 1514.96                 | 17.679                | -0.031   | -0.094 | -10.808               | -0.011   | 0.058  | -0.063 |
| 181      | 1515.02                 | 8.944                 | -0.008   | -0.048 | 32.439                | -0.103   | -0.173 | -0.041 |
| 182      | 1515.43                 | 0.512                 | 0.000    | -0.003 | 34.813                | -0.119   | -0.185 | -0.001 |
| 183      | 1545.91                 | -0.142                | 0.000    | 0.001  | -30.335               | -0.088   | 0.158  | 0.000  |
| 184      | 1568.47                 | 0.713                 | 0.000    | -0.004 | -14.856               | -0.021   | 0.076  | -0.004 |
| 185      | 1633.27                 | 90.455                | -0.742   | -0.447 | 47.889                | -0.208   | -0.236 | -0.567 |
| 186      | 1641.96                 | -3.377                | -0.001   | 0.017  | -2.931                | -0.001   | 0.014  | 0.021  |
| 187      | 1661.09                 | -123.710              | -1.365   | 0.601  | 2.271                 | 0.000    | -0.011 | 0.555  |
| 188      | 1669.59                 | 1.580                 | 0.000    | -0.008 | -21.093               | -0.039   | 0.102  | -0.007 |
| 189      | 1677.42                 | 1.878                 | 0.000    | -0.009 | -8.006                | -0.006   | 0.038  | -0.008 |
| 190      | 1690.87                 | -1.532                | 0.000    | 0.007  | -9.202                | -0.007   | 0.044  | 0.008  |
| 191      | 3039.23                 | 0.002                 | 0.000    | 0.000  | -50.706               | -0.125   | 0.135  | 0.000  |
| 192      | 3039.29                 | 0.004                 | 0.000    | 0.000  | 5.828                 | -0.002   | -0.015 | 0.000  |
| 193      | 3039.36                 | -0.008                | 0.000    | 0.000  | -4.226                | -0.001   | 0.011  | 0.000  |
| 194      | 3039.38                 | -0.007                | 0.000    | 0.000  | -46.501               | -0.105   | 0.123  | 0.000  |
| 195      | 3040.60                 | -0.006                | 0.000    | 0.000  | -19.204               | -0.018   | 0.051  | 0.000  |
| 196      | 3040.64                 | 0.018                 | 0.000    | 0.000  | 3.181                 | 0.000    | -0.008 | 0.000  |
| 197      | 3040.65                 | -0.008                | 0.000    | 0.000  | -46.529               | -0.106   | 0.123  | 0.000  |
| 198      | 3040.72                 | 0.002                 | 0.000    | 0.000  | 24.806                | -0.030   | -0.066 | 0.000  |
| 199      | 3046.44                 | -0.045                | 0.000    | 0.000  | 96.760                | -0.455   | -0.256 | 0.000  |
| 200      | 3046.49                 | -0.089                | 0.000    | 0.000  | -95.174               | -0.441   | 0.252  | 0.000  |
| 201      | 3046.57                 | 0.314                 | 0.000    | -0.001 | -134.236              | -0.877   | 0.355  | 0.000  |
| 202      | 3046.62                 | -0.664                | 0.000    | 0.002  | 100.384               | -0.490   | -0.266 | 0.000  |
| 203      | 3112.54                 | 0.061                 | 0.000    | 0.000  | -137.050              | -0.894   | 0.355  | 0.001  |
| 204      | 3112.61                 | 0.031                 | 0.000    | 0.000  | 149.306               | -1.061   | -0.387 | 0.000  |
| 205      | 3112.66                 | 0.006                 | 0.000    | 0.000  | 45.765                | -0.100   | -0.119 | 0.000  |
| 206      | 3112.69                 | -0.189                | 0.000    | 0.000  | 7.898                 | -0.003   | -0.020 | -0.001 |
| 207      | 3115.49                 | -0.001                | 0.000    | 0.000  | -50.967               | -0.124   | 0.132  | 0.000  |
| 208      | 3115.51                 | 0.018                 | 0.000    | 0.000  | -13.979               | -0.009   | 0.036  | 0.000  |
| 209      | 3115.55                 | -0.012                | 0.000    | 0.000  | 48.581                | -0.112   | -0.126 | 0.000  |
| 210      | 3115.59                 | -0.004                | 0.000    | 0.000  | 54.051                | -0.139   | -0.140 | 0.000  |
| 211      | 3120.29                 | -0.008                | 0.000    | 0.000  | 8.857                 | -0.004   | -0.023 | 0.000  |
| 212      | 3120.37                 | 0.000                 | 0.000    | 0.000  | 12.493                | -0.007   | -0.032 | 0.000  |
| 213      | 3120.40                 | -0.001                | 0.000    | 0.000  | 3.068                 | 0.000    | -0.008 | 0.000  |
| 214      | 3120.83                 | 0.386                 | 0.000    | -0.001 | -44.789               | -0.095   | 0.116  | 0.001  |
| 215      | 3122.04                 | -0.008                | 0.000    | 0.000  | -64.646               | -0.198   | 0.167  | 0.000  |
| 216      | 3122.05                 | 0.011                 | 0.000    | 0.000  | -35.590               | -0.060   | 0.092  | 0.000  |
| 217      | 3122.06                 | 0.005                 | 0.000    | 0.000  | -41.172               | -0.080   | 0.106  | 0.000  |
| 218      | 3122.07                 | 0.030                 | 0.000    | 0.000  | 12.157                | -0.007   | -0.031 | 0.000  |
| 219      | 3126.02                 | 0.018                 | 0.000    | 0.000  | -47.182               | -0.106   | 0.122  | 0.000  |
| 220      | 3126.06                 | -0.007                | 0.000    | 0.000  | -51.453               | -0.126   | 0.133  | 0.000  |
| 221      | 3126.11                 | 0.002                 | 0.000    | 0.000  | -60.407               | -0.173   | 0.156  | 0.000  |
| 222      | 3126.11                 | -0.011                | 0.000    | 0.000  | -6.108                | -0.002   | 0.016  | 0.000  |
| 223      | 3127.30                 | 0.159                 | 0.000    | 0.000  | 5.690                 | -0.002   | -0.015 | 0.000  |

Continued on next page

— Continued from previous page

| $\alpha$ | Freq. /cm <sup>-1</sup> | $\kappa_{\alpha}$ / meV | dE / meV | dQ     | $\kappa_{\alpha}$ / meV | dE / meV | dQ     | $\xi$  |
|----------|-------------------------|-------------------------|----------|--------|-------------------------|----------|--------|--------|
| 224      | 3127.36                 | 0.067                   | 0.000    | 0.000  | 16.833                  | -0.013   | -0.043 | 0.000  |
| 225      | 3127.53                 | -0.382                  | 0.000    | 0.001  | 32.246                  | -0.049   | -0.083 | -0.001 |
| 226      | 3127.58                 | 0.860                   | 0.000    | -0.002 | -29.304                 | -0.041   | 0.076  | -0.002 |
| 227      | 3201.25                 | -0.073                  | 0.000    | 0.000  | 40.821                  | -0.077   | -0.103 | 0.000  |
| 228      | 3201.59                 | -0.011                  | 0.000    | 0.000  | 27.985                  | -0.036   | -0.070 | 0.000  |
| 229      | 3206.04                 | 0.111                   | 0.000    | 0.000  | 30.676                  | -0.043   | -0.077 | -0.002 |
| 230      | 3206.23                 | -0.983                  | 0.000    | 0.002  | 74.128                  | -0.254   | -0.186 | 0.014  |
| 231      | 3212.56                 | -0.082                  | 0.000    | 0.000  | 2.661                   | 0.000    | -0.007 | 0.000  |
| 232      | 3212.72                 | 0.202                   | 0.000    | -0.001 | 69.444                  | -0.222   | -0.174 | 0.000  |
| 233      | 3222.07                 | -10.135                 | -0.005   | 0.025  | -1.371                  | 0.000    | 0.003  | 0.038  |
| 234      | 3222.15                 | 13.684                  | -0.009   | -0.034 | 66.155                  | -0.201   | -0.166 | -0.048 |

## S2 TAT-3DBTO2

### S2-1 Geometry

**Table S9:** Cartesian coordinates of the GS Minimum of TAT-3DBTO<sub>2</sub>.

| At | x       | y       | z       | At | x       | y       | z       | At | x       | y       | z       |
|----|---------|---------|---------|----|---------|---------|---------|----|---------|---------|---------|
| C  | 1.3951  | -0.0057 | 1.6208  | C  | -3.1715 | 3.8658  | 1.8773  | O  | -7.5445 | 3.6524  | 0.2362  |
| C  | 0.7104  | -1.2426 | 1.6630  | C  | -4.4109 | 4.3027  | 1.4133  | O  | -6.4651 | 5.5698  | -1.0049 |
| C  | 0.7209  | 1.2366  | 1.6630  | C  | -4.8744 | 3.7934  | 0.2122  | H  | 5.1312  | -1.8044 | 1.5906  |
| C  | -0.6926 | 1.2111  | 1.6208  | C  | -4.1440 | 2.8767  | -0.5487 | H  | 0.7919  | -4.2104 | 2.1426  |
| C  | -0.7025 | -1.2054 | 1.6208  | C  | -2.8992 | 2.4606  | -0.0911 | H  | 5.0697  | -4.2660 | 1.8776  |
| C  | -1.4314 | 0.0061  | 1.6630  | C  | -1.7621 | -4.6795 | 1.8773  | H  | 2.9045  | -5.4396 | 2.1902  |
| N  | 2.7664  | -0.2518 | 1.6105  | C  | -1.5208 | -5.9713 | 1.4133  | H  | 3.2503  | 2.7910  | 2.1426  |
| C  | 2.9732  | -1.6303 | 1.7017  | C  | -0.8480 | -6.1180 | 0.2122  | H  | 3.2586  | 5.2351  | 2.1902  |
| C  | 1.7228  | -2.2817 | 1.7801  | C  | -0.4192 | -5.0272 | -0.5487 | H  | 1.1596  | 6.5235  | 1.8776  |
| C  | 1.1146  | 2.6329  | 1.7801  | C  | -0.6813 | -3.7411 | -0.0911 | H  | -1.0030 | 5.3459  | 1.5906  |
| N  | -1.1651 | 2.5216  | 1.6105  | S  | 6.8347  | 3.4874  | -0.5647 | H  | -4.0422 | 1.4194  | 2.1426  |
| C  | -0.0747 | 3.3901  | 1.7017  | C  | 5.7152  | 3.7269  | -1.9376 | H  | -4.1282 | -3.5416 | 1.5906  |
| C  | -2.8375 | -0.3511 | 1.7801  | C  | 4.5590  | 2.9569  | -1.7854 | H  | -6.2293 | -2.2575 | 1.8776  |
| N  | -1.6012 | -2.2699 | 1.6105  | S  | -6.4376 | 4.1753  | -0.5647 | H  | -6.1630 | 0.2044  | 2.1902  |
| C  | -2.8985 | -1.7597 | 1.7017  | C  | -6.0852 | 3.0861  | -1.9376 | H  | 5.0375  | 0.3108  | 2.8352  |
| C  | 4.1832  | -2.3226 | 1.7049  | C  | -4.8403 | 2.4697  | -1.7854 | H  | 6.8397  | 1.8295  | 1.9893  |
| C  | 1.7177  | -3.6687 | 1.9918  | S  | -0.3972 | -7.6628 | -0.5647 | H  | 2.6634  | 1.1161  | -0.6507 |
| C  | 4.1403  | -3.7010 | 1.8649  | C  | 0.3700  | -6.8130 | -1.9376 | H  | -2.7879 | 4.2072  | 2.8352  |
| C  | 2.9189  | -4.3638 | 2.0314  | C  | 0.2813  | -5.4267 | -1.7854 | H  | -5.0042 | 5.0086  | 1.9893  |
| C  | 2.3183  | 3.3219  | 1.9918  | C  | 5.9242  | 4.5604  | -3.0230 | H  | -2.2982 | 1.7485  | -0.6507 |
| C  | 2.3197  | 4.7098  | 2.0314  | C  | 4.9271  | 4.6215  | -3.9971 | H  | -2.2495 | -4.5180 | 2.8352  |
| C  | 1.1350  | 5.4361  | 1.8649  | C  | 3.7631  | 3.8632  | -3.8642 | H  | -1.8355 | -6.8381 | 1.9893  |
| C  | -0.0802 | 4.7840  | 1.7049  | C  | 3.5703  | 3.0297  | -2.7633 | H  | -0.3652 | -2.8646 | -0.6507 |
| C  | -4.0360 | 0.3468  | 1.9918  | C  | -6.9115 | 2.8503  | -3.0230 | H  | 6.8356  | 5.1468  | -3.1103 |
| C  | -4.1030 | -2.4614 | 1.7049  | C  | -6.4659 | 1.9563  | -3.9971 | H  | 5.0585  | 5.2657  | -4.8631 |
| C  | -5.2753 | -1.7351 | 1.8649  | C  | -5.2272 | 1.3273  | -3.8642 | H  | 2.9928  | 3.9243  | -4.6296 |
| C  | -5.2386 | -0.3460 | 2.0314  | C  | -4.4089 | 1.5771  | -2.7633 | H  | 2.6554  | 2.4487  | -2.6713 |
| C  | -1.3416 | -3.5732 | 1.1297  | C  | 0.9873  | -7.4107 | -3.0230 | H  | -7.8750 | 3.3464  | -3.1103 |
| C  | 3.7653  | 0.6248  | 1.1297  | C  | 1.5387  | -6.5777 | -3.9971 | H  | -7.0895 | 1.7480  | -4.8631 |
| C  | -2.4237 | 2.9485  | 1.1297  | C  | 1.4641  | -5.1906 | -3.8642 | H  | -4.8950 | 0.6296  | -4.6296 |
| C  | 4.9336  | 0.8137  | 1.8773  | C  | 0.8386  | -4.6068 | -2.7633 | H  | -3.4484 | 1.0753  | -2.6713 |
| C  | 5.9317  | 1.6686  | 1.4133  | O  | 0.6091  | -8.3599 | 0.2362  | H  | 1.0395  | -8.4932 | -3.1103 |
| C  | 5.7224  | 2.3246  | 0.2122  | O  | -1.5911 | -8.3838 | -1.0049 | H  | 2.0310  | -7.0137 | -4.8631 |
| C  | 4.5633  | 2.1505  | -0.5487 | O  | 6.9353  | 4.7075  | 0.2362  | H  | 1.9022  | -4.5540 | -4.6296 |
| C  | 3.5805  | 1.2805  | -0.0911 | O  | 8.0561  | 2.8140  | -1.0049 | H  | 0.7930  | -3.5240 | -2.6713 |



**Table S10:** Cartesian coordinates of the  $S_1$   $C_3$  Minimum of TAT-3DBTO<sub>2</sub>.

| At | x       | y       | z       | At | x       | y       | z       | At | x       | y       | z       |
|----|---------|---------|---------|----|---------|---------|---------|----|---------|---------|---------|
| C  | 1.4036  | 0.0022  | 1.5017  | C  | -3.2155 | 3.6926  | 2.0122  | O  | -7.6182 | 3.1149  | 0.6455  |
| C  | 0.7084  | -1.2556 | 1.5475  | C  | -4.5201 | 4.0635  | 1.6856  | O  | -6.9889 | 5.3799  | -0.2633 |
| C  | 0.7332  | 1.2412  | 1.5475  | C  | -5.0259 | 3.6900  | 0.4532  | H  | 5.1195  | -1.7502 | 1.3415  |
| C  | -0.7037 | 1.2145  | 1.5017  | C  | -4.2657 | 2.9872  | -0.5082 | H  | 0.8266  | -4.2383 | 1.9582  |
| C  | -0.6999 | -1.2167 | 1.5017  | C  | -2.9642 | 2.6180  | -0.1750 | H  | 5.0935  | -4.2336 | 1.5612  |
| C  | -1.4415 | 0.0143  | 1.5475  | C  | -1.5902 | -4.6310 | 2.0122  | H  | 2.9472  | -5.4402 | 1.8852  |
| N  | 2.7537  | -0.2522 | 1.4338  | C  | -1.2591 | -5.9463 | 1.6856  | H  | 3.2572  | 2.8350  | 1.9582  |
| C  | 2.9672  | -1.6237 | 1.5045  | C  | -0.6827 | -6.1976 | 0.4532  | H  | 3.2378  | 5.2724  | 1.8852  |
| C  | 1.7215  | -2.2870 | 1.6167  | C  | -0.4542 | -5.1878 | -0.5082 | H  | 1.1197  | 6.5279  | 1.5612  |
| C  | 1.1199  | 2.6344  | 1.6167  | C  | -0.7851 | -3.8761 | -0.1750 | H  | -1.0440 | 5.3087  | 1.3415  |
| N  | -1.1585 | 2.5109  | 1.4338  | S  | 6.7685  | 3.8167  | -0.1211 | H  | -4.0837 | 1.4033  | 1.9582  |
| C  | -0.0774 | 3.3816  | 1.5045  | C  | 5.9375  | 3.8750  | -1.6970 | H  | -4.0755 | -3.5585 | 1.3415  |
| C  | -2.8414 | -0.3473 | 1.6167  | C  | 4.8651  | 2.9691  | -1.7422 | H  | -6.2132 | -2.2943 | 1.5612  |
| N  | -1.5952 | -2.2587 | 1.4338  | S  | -6.6896 | 3.9534  | -0.1211 | H  | -6.1849 | 0.1678  | 1.8852  |
| C  | -2.8898 | -1.7578 | 1.5045  | C  | -6.3246 | 3.2046  | -1.6970 | H  | 4.7998  | 0.4484  | 2.9818  |
| C  | 4.1865  | -2.2929 | 1.4634  | C  | -5.0039 | 2.7288  | -1.7422 | H  | 6.5653  | 2.1367  | 2.3930  |
| C  | 1.7379  | -3.6809 | 1.7914  | S  | -0.0789 | -7.7701 | -0.1211 | H  | 2.9509  | 0.9996  | -0.8668 |
| C  | 4.1599  | -3.6770 | 1.5898  | C  | 0.3871  | -7.0795 | -1.6970 | H  | -2.7883 | 3.9326  | 2.9818  |
| C  | 2.9491  | -4.3589 | 1.7699  | C  | 0.1388  | -5.6978 | -1.7422 | H  | -5.1331 | 4.6174  | 2.3930  |
| C  | 2.3189  | 3.3455  | 1.7914  | C  | 6.2651  | 4.7036  | -2.7573 | H  | -2.3411 | 2.0558  | -0.8668 |
| C  | 2.3004  | 4.7335  | 1.7699  | C  | 5.4902  | 4.6257  | -3.9138 | H  | -2.0116 | -4.3810 | 2.9818  |
| C  | 1.1044  | 5.4411  | 1.5898  | C  | 4.4159  | 3.7318  | -3.9818 | H  | -1.4322 | -6.7541 | 2.3930  |
| C  | -0.1075 | 4.7721  | 1.4634  | C  | 4.0979  | 2.9051  | -2.9092 | H  | -0.6098 | -3.0554 | -0.8668 |
| C  | -4.0567 | 0.3354  | 1.7914  | C  | -7.2060 | 3.0739  | -2.7573 | H  | 7.1045  | 5.3914  | -2.6866 |
| C  | -4.0790 | -2.4791 | 1.4634  | C  | -6.7511 | 2.4418  | -3.9138 | H  | 5.7230  | 5.2609  | -4.7649 |
| C  | -5.2643 | -1.7641 | 1.5898  | C  | -5.4397 | 1.9584  | -3.9818 | H  | 3.8194  | 3.6801  | -4.8901 |
| C  | -5.2495 | -0.3746 | 1.7699  | C  | -4.5648 | 2.0963  | -2.9092 | H  | 3.2610  | 2.2137  | -2.9832 |
| C  | -1.3170 | -3.6091 | 1.0830  | C  | 0.9409  | -7.7775 | -2.7573 | H  | -8.2213 | 3.4570  | -2.6866 |
| C  | 3.7841  | 0.6640  | 1.0830  | C  | 1.2609  | -7.0675 | -3.9138 | H  | -7.4176 | 2.3258  | -4.7649 |
| C  | -2.4671 | 2.9451  | 1.0830  | C  | 1.0239  | -5.6901 | -3.9818 | H  | -5.0967 | 1.4676  | -4.8901 |
| C  | 4.8056  | 0.9384  | 2.0122  | C  | 0.4670  | -5.0014 | -2.9092 | H  | -3.5476 | 1.7173  | -2.9832 |
| C  | 5.7792  | 1.8828  | 1.6856  | O  | 1.1115  | -8.1550 | 0.6455  | H  | 1.1168  | -8.8483 | -2.6866 |
| C  | 5.7086  | 2.5076  | 0.4532  | O  | -1.1647 | -8.7425 | -0.2633 | H  | 1.6946  | -7.5867 | -4.7649 |
| C  | 4.7199  | 2.2006  | -0.5082 | O  | 6.5067  | 5.0401  | 0.6455  | H  | 1.2774  | -5.1477 | -4.8901 |
| C  | 3.7493  | 1.2581  | -0.1750 | O  | 8.1536  | 3.3626  | -0.2633 | H  | 0.2866  | -3.9310 | -2.9832 |

**Table S11:** Cartesian coordinates of the  $S_1$   $C_1$  Minimum of TAT-3DBTO<sub>2</sub>.

| At | x       | y       | z      | At | x       | y      | z       | At | x       | y       | z       |
|----|---------|---------|--------|----|---------|--------|---------|----|---------|---------|---------|
| C  | 1.4283  | -0.0225 | 1.4505 | C  | -3.1792 | 3.7922 | 1.9425  | O  | -7.6247 | 3.3816  | 0.6253  |
| C  | 0.7318  | -1.2592 | 1.5442 | C  | -4.4635 | 4.1984 | 1.5824  | O  | -6.7908 | 5.4471  | -0.5713 |
| C  | 0.7529  | 1.2378  | 1.4963 | C  | -4.9909 | 3.7136 | 0.3978  | H  | 5.1239  | -1.7427 | 1.1809  |
| C  | -0.6954 | 1.2055  | 1.5397 | C  | -4.2826 | 2.8653 | -0.4574 | H  | 0.8718  | -4.2519 | 2.0114  |

Continued on next page

— Continued from previous page

| At | x       | y       | z       | At | x       | y       | z       | At | x       | y       | z       |
|----|---------|---------|---------|----|---------|---------|---------|----|---------|---------|---------|
| C  | -0.6745 | -1.2153 | 1.5662  | C  | -2.9970 | 2.4734  | -0.0991 | H  | 5.1284  | -4.2315 | 1.4737  |
| C  | -1.4136 | 0.0196  | 1.6543  | C  | -1.6928 | -4.6420 | 1.9563  | H  | 3.0046  | -5.4312 | 1.9091  |
| N  | 2.7671  | -0.2826 | 1.3190  | C  | -1.4751 | -5.9567 | 1.5467  | H  | 3.2904  | 2.8013  | 1.6937  |
| C  | 2.9764  | -1.6407 | 1.3987  | C  | -0.8870 | -6.1649 | 0.3110  | H  | 3.3068  | 5.2284  | 1.4841  |
| C  | 1.7390  | -2.3047 | 1.5758  | C  | -0.5160 | -5.1196 | -0.5387 | H  | 1.1683  | 6.4927  | 1.2737  |
| C  | 1.1313  | 2.6161  | 1.5146  | C  | -0.7536 | -3.8102 | -0.1341 | H  | -1.0147 | 5.3095  | 1.2801  |
| N  | -1.1653 | 2.5066  | 1.4959  | S  | 6.4866  | 4.1137  | 0.1140  | H  | -4.0165 | 1.4137  | 2.2342  |
| C  | -0.0735 | 3.3733  | 1.4634  | C  | 5.9639  | 3.9769  | -1.5738 | H  | -4.0908 | -3.5334 | 1.5621  |
| C  | -2.8188 | -0.3426 | 1.7978  | C  | 5.0299  | 2.9226  | -1.7447 | H  | -6.1945 | -2.2659 | 1.9336  |
| N  | -1.5741 | -2.2497 | 1.5338  | S  | -6.6347 | 4.0349  | -0.2309 | H  | -6.1333 | 0.1879  | 2.2956  |
| C  | -2.8781 | -1.7443 | 1.6777  | C  | -6.3265 | 3.0547  | -1.6933 | H  | 4.6547  | 0.5485  | 3.0462  |
| C  | 4.2071  | -2.3028 | 1.3380  | C  | -5.0451 | 2.4968  | -1.6665 | H  | 6.2841  | 2.4082  | 2.5912  |
| C  | 1.7701  | -3.6893 | 1.7903  | S  | -0.4875 | -7.7532 | -0.4102 | H  | 3.1792  | 0.8347  | -1.0114 |
| C  | 4.1946  | -3.6757 | 1.5077  | C  | 0.1839  | -6.9808 | -1.8749 | H  | -2.7356 | 4.1168  | 2.8804  |
| C  | 2.9891  | -4.3555 | 1.7483  | C  | 0.1019  | -5.5877 | -1.7951 | H  | -5.0399 | 4.8615  | 2.2227  |
| C  | 2.3554  | 3.3239  | 1.5705  | C  | 6.3495  | 4.8138  | -2.6110 | H  | -2.4082 | 1.8122  | -0.7297 |
| C  | 2.3542  | 4.7036  | 1.4826  | C  | 5.7958  | 4.6143  | -3.8718 | H  | -2.1215 | -4.4279 | 2.9320  |
| C  | 1.1488  | 5.4088  | 1.3611  | C  | 4.8605  | 3.5815  | -4.0661 | H  | -1.7462 | -6.7926 | 2.1869  |
| C  | -0.0852 | 4.7535  | 1.3628  | C  | 4.4789  | 2.7459  | -3.0298 | H  | -0.4840 | -2.9645 | -0.7613 |
| C  | -4.0103 | 0.3458  | 2.0552  | C  | -7.2136 | 2.8461  | -2.7353 | H  | 7.0751  | 5.6052  | -2.4343 |
| C  | -4.0702 | -2.4561 | 1.6998  | C  | -6.7926 | 2.0427  | -3.7956 | H  | 6.0861  | 5.2512  | -4.7035 |
| C  | -5.2444 | -1.7376 | 1.9085  | C  | -5.5173 | 1.4759  | -3.7899 | H  | 4.4328  | 3.4306  | -5.0559 |
| C  | -5.2110 | -0.3555 | 2.1053  | C  | -4.6377 | 1.6969  | -2.7309 | H  | 3.7647  | 1.9444  | -3.2115 |
| C  | -1.3277 | -3.5845 | 1.1182  | C  | 0.7315  | -7.6389 | -2.9627 | H  | -8.2031 | 3.2965  | -2.7264 |
| C  | 3.8180  | 0.6451  | 1.0236  | C  | 1.2171  | -6.8613 | -4.0146 | H  | -7.4629 | 1.8603  | -4.6320 |
| C  | -2.4652 | 2.9239  | 1.1107  | C  | 1.1484  | -5.4687 | -3.9547 | H  | -5.2029 | 0.8537  | -4.6245 |
| C  | 4.7158  | 1.0216  | 2.0717  | C  | 0.5934  | -4.8235 | -2.8504 | H  | -3.6458 | 1.2507  | -2.7437 |
| C  | 5.6160  | 2.0516  | 1.8092  | O  | 0.5694  | -8.4021 | 0.3639  | H  | 0.7816  | -8.7245 | -2.9933 |
| C  | 5.6351  | 2.6451  | 0.5576  | O  | -1.7113 | -8.4881 | -0.7237 | H  | 1.6544  | -7.3451 | -4.8845 |
| C  | 4.8053  | 2.1863  | -0.5363 | O  | 5.8544  | 5.2896  | 0.7548  | H  | 1.5360  | -4.8762 | -4.7801 |
| C  | 3.8825  | 1.1752  | -0.2527 | O  | 7.9468  | 4.0110  | 0.2653  | H  | 0.5531  | -3.7371 | -2.8172 |

**Table S12:** Cartesian coordinates of the  $S_1$  LVC Minimum of TAT-3DBTO<sub>2</sub>.

| At | x       | y       | z      | At | x       | y       | z       | At | x       | y       | z       |
|----|---------|---------|--------|----|---------|---------|---------|----|---------|---------|---------|
| C  | 1.3906  | -0.0421 | 1.5478 | C  | -3.2197 | 3.7173  | 2.0349  | O  | -7.5815 | 3.3553  | 0.3936  |
| C  | 0.6866  | -1.2940 | 1.5888 | C  | -4.4963 | 4.1318  | 1.6467  | O  | -6.7366 | 5.6490  | -0.4564 |
| C  | 0.7312  | 1.2013  | 1.6113 | C  | -4.9344 | 3.7854  | 0.3666  | H  | 5.0992  | -1.8305 | 1.4270  |
| C  | -0.7054 | 1.1893  | 1.5540 | C  | -4.1337 | 3.0550  | -0.5737 | H  | 0.7755  | -4.2635 | 2.0657  |
| C  | -0.7210 | -1.2424 | 1.5243 | C  | -2.8671 | 2.6392  | -0.1733 | H  | 5.0484  | -4.3068 | 1.7006  |
| C  | -1.4544 | -0.0052 | 1.5694 | C  | -1.6963 | -4.6811 | 1.9345  | H  | 2.8914  | -5.4842 | 2.0443  |
| N  | 2.7427  | -0.3028 | 1.4832 | C  | -1.3894 | -5.9975 | 1.5721  | H  | 3.2702  | 2.7389  | 2.1017  |
| C  | 2.9472  | -1.6767 | 1.5769 | C  | -0.7495 | -6.2162 | 0.3610  | H  | 3.2722  | 5.1823  | 2.1716  |
| C  | 1.6921  | -2.3282 | 1.6862 | C  | -0.4161 | -5.1634 | -0.5310 | H  | 1.1735  | 6.4759  | 1.8985  |

Continued on next page

— Continued from previous page

| At | x       | y       | z       | At | x       | y       | z       | At | x       | y       | z       |
|----|---------|---------|---------|----|---------|---------|---------|----|---------|---------|---------|
| C  | 1.1311  | 2.5832  | 1.7444  | C  | -0.7286 | -3.8541 | -0.1660 | H  | -1.0024 | 5.2936  | 1.5909  |
| N  | -1.1465 | 2.4941  | 1.5311  | S  | 6.7395  | 3.6313  | -0.4746 | H  | -4.0888 | 1.4040  | 1.9563  |
| C  | -0.0577 | 3.3504  | 1.6591  | C  | 5.7070  | 3.7616  | -1.9330 | H  | -4.1219 | -3.5571 | 1.3190  |
| C  | -2.8561 | -0.3571 | 1.6268  | C  | 4.5887  | 2.9122  | -1.8524 | H  | -6.2514 | -2.2769 | 1.5309  |
| N  | -1.6263 | -2.2782 | 1.4405  | S  | -6.5389 | 4.1624  | -0.3136 | H  | -6.2034 | 0.1812  | 1.8713  |
| C  | -2.9185 | -1.7690 | 1.5089  | C  | -6.0877 | 3.3968  | -1.9134 | H  | 4.9574  | 0.3439  | 2.8314  |
| C  | 4.1590  | -2.3597 | 1.5551  | C  | -4.7865 | 2.8516  | -1.8876 | H  | 6.7124  | 1.9695  | 2.0700  |
| C  | 1.6946  | -3.7181 | 1.8934  | S  | -0.2109 | -7.8004 | -0.2709 | H  | 2.7203  | 1.0015  | -0.7960 |
| C  | 4.1195  | -3.7412 | 1.7103  | C  | 0.4200  | -7.0357 | -1.7684 | H  | -2.8409 | 3.9400  | 3.0372  |
| C  | 2.9010  | -4.4067 | 1.8985  | C  | 0.2422  | -5.6351 | -1.7531 | H  | -5.1373 | 4.7042  | 2.3368  |
| C  | 2.3373  | 3.2703  | 1.9627  | C  | 5.9404  | 4.5842  | -3.0236 | H  | -2.2129 | 2.0641  | -0.8501 |
| C  | 2.3323  | 4.6580  | 2.0165  | C  | 5.0179  | 4.5555  | -4.0780 | H  | -2.1680 | -4.4591 | 2.8902  |
| C  | 1.1459  | 5.3891  | 1.8662  | C  | 3.8952  | 3.7159  | -4.0191 | H  | -1.6344 | -6.8329 | 2.2338  |
| C  | -0.0720 | 4.7410  | 1.6916  | C  | 3.6738  | 2.8954  | -2.9168 | H  | -0.4848 | -3.0065 | -0.8127 |
| C  | -4.0692 | 0.3347  | 1.7915  | C  | -6.8869 | 3.3224  | -3.0563 | H  | 6.8191  | 5.2295  | -3.0538 |
| C  | -4.1153 | -2.4784 | 1.4509  | C  | -6.3622 | 2.6800  | -4.2233 | H  | 5.1732  | 5.1879  | -4.9491 |
| C  | -5.2970 | -1.7548 | 1.5712  | C  | -5.0657 | 2.1308  | -4.2220 | H  | 3.1830  | 3.7026  | -4.8490 |
| C  | -5.2695 | -0.3661 | 1.7582  | C  | -4.2764 | 2.2092  | -3.0640 | H  | 2.7946  | 2.2478  | -2.8897 |
| C  | -1.3429 | -3.6219 | 1.0662  | C  | 1.0213  | -7.7002 | -2.8277 | H  | -7.8914 | 3.7563  | -3.0424 |
| C  | 3.7489  | 0.6020  | 1.0526  | C  | 1.4626  | -6.9323 | -3.9185 | H  | -6.9630 | 2.6092  | -5.1390 |
| C  | -2.4325 | 2.9513  | 1.1289  | C  | 1.2967  | -5.5341 | -3.9241 | H  | -4.6674 | 1.6333  | -5.1409 |
| C  | 4.8742  | 0.8412  | 1.8685  | C  | 0.6911  | -4.8802 | -2.8527 | H  | -3.2692 | 1.7765  | -3.0825 |
| C  | 5.8430  | 1.7545  | 1.4479  | O  | 0.8890  | -8.3307 | 0.5620  | H  | 1.1423  | -8.7880 | -2.8066 |
| C  | 5.6659  | 2.3943  | 0.2322  | O  | -1.3592 | -8.6835 | -0.5733 | H  | 1.9374  | -7.4231 | -4.7668 |
| C  | 4.5566  | 2.1398  | -0.6082 | O  | 6.6839  | 4.8703  | 0.3215  | H  | 1.6456  | -4.9466 | -4.7813 |
| C  | 3.5960  | 1.2265  | -0.1854 | O  | 8.0592  | 3.0641  | -0.8100 | H  | 0.5698  | -3.7907 | -2.8759 |

**Table S13:** Cartesian coordinates of the T<sub>1</sub> Minimum of TAT-3DBTO<sub>2</sub>.

| At | x       | y       | z      | At | x       | y       | z       | At | x       | y       | z       |
|----|---------|---------|--------|----|---------|---------|---------|----|---------|---------|---------|
| C  | 1.4151  | -0.0298 | 1.6193 | C  | -3.1117 | 3.9068  | 1.8267  | O  | -7.4962 | 3.7067  | 0.2102  |
| C  | 0.6944  | -1.2895 | 1.6697 | C  | -4.3509 | 4.3475  | 1.3668  | O  | -6.4108 | 5.6144  | -1.0400 |
| C  | 0.7406  | 1.2303  | 1.6608 | C  | -4.8258 | 3.8312  | 0.1732  | H  | 5.1158  | -1.8919 | 1.6330  |
| C  | -0.6605 | 1.2256  | 1.5638 | C  | -4.1060 | 2.9038  | -0.5871 | H  | 0.7418  | -4.2322 | 2.1942  |
| C  | -0.6829 | -1.2485 | 1.5599 | C  | -2.8621 | 2.4822  | -0.1346 | H  | 5.0236  | -4.3471 | 1.9740  |
| C  | -1.4317 | 0.0098  | 1.6172 | C  | -1.8763 | -4.6962 | 1.7753  | H  | 2.8459  | -5.4929 | 2.2844  |
| N  | 2.7733  | -0.2994 | 1.5915 | C  | -1.6431 | -5.9873 | 1.3085  | H  | 3.2752  | 2.7138  | 2.2367  |
| C  | 2.9641  | -1.6885 | 1.7319 | C  | -0.9015 | -6.1422 | 0.1489  | H  | 3.3212  | 5.1621  | 2.3207  |
| C  | 1.7067  | -2.3275 | 1.8179 | C  | -0.3912 | -5.0533 | -0.5653 | H  | 1.2596  | 6.4930  | 1.9539  |
| C  | 1.1445  | 2.6061  | 1.8126 | C  | -0.6396 | -3.7667 | -0.1050 | H  | -0.9168 | 5.3676  | 1.5747  |
| N  | -1.1220 | 2.5372  | 1.5580 | S  | 6.7496  | 3.4883  | -0.6533 | H  | -3.9459 | 1.4849  | 2.2428  |
| C  | -0.0332 | 3.3900  | 1.7024 | C  | 5.5705  | 3.7640  | -1.9681 | H  | -4.1814 | -3.4790 | 1.6274  |
| C  | -2.7901 | -0.3209 | 1.8106 | C  | 4.4236  | 2.9840  | -1.7914 | H  | -6.2437 | -2.1279 | 1.9636  |
| N  | -1.6133 | -2.2894 | 1.5579 | S  | -6.3897 | 4.2208  | -0.5972 | H  | -6.1041 | 0.3246  | 2.3106  |

Continued on next page

— Continued from previous page

| At | x       | y       | z       | At | x       | y       | z       | At | x       | y       | z       |
|----|---------|---------|---------|----|---------|---------|---------|----|---------|---------|---------|
| C  | -2.8993 | -1.7481 | 1.7197  | C  | -6.0509 | 3.1250  | -1.9683 | H  | 5.1305  | 0.1919  | 2.7140  |
| C  | 4.1600  | -2.3920 | 1.7574  | C  | -4.8113 | 2.4972  | -1.8183 | H  | 6.8817  | 1.7352  | 1.8328  |
| C  | 1.6785  | -3.7067 | 2.0490  | S  | -0.4476 | -7.6878 | -0.6185 | H  | 2.5747  | 1.1270  | -0.6197 |
| C  | 4.0993  | -3.7748 | 1.9449  | C  | 0.4283  | -6.8442 | -1.9285 | H  | -2.7207 | 4.2513  | 2.7804  |
| C  | 2.8758  | -4.4198 | 2.1116  | C  | 0.3726  | -5.4576 | -1.7621 | H  | -4.9361 | 5.0620  | 1.9404  |
| C  | 2.3591  | 3.2696  | 2.0724  | C  | 5.7306  | 4.6312  | -3.0357 | H  | -2.2672 | 1.7648  | -0.6936 |
| C  | 2.3801  | 4.6522  | 2.1282  | C  | 4.6950  | 4.7160  | -3.9664 | H  | -2.4132 | -4.5376 | 2.7065  |
| C  | 1.2106  | 5.4069  | 1.9291  | C  | 3.5405  | 3.9469  | -3.8094 | H  | -2.0175 | -6.8508 | 1.8530  |
| C  | -0.0109 | 4.7853  | 1.7177  | C  | 3.3960  | 3.0807  | -2.7271 | H  | -0.2602 | -2.8946 | -0.6310 |
| C  | -3.9815 | 0.4162  | 2.0711  | C  | -6.8834 | 2.8911  | -3.0494 | H  | 6.6355  | 5.2244  | -3.1422 |
| C  | -4.1119 | -2.4026 | 1.7508  | C  | -6.4504 | 1.9874  | -4.0201 | H  | 4.7883  | 5.3863  | -4.8175 |
| C  | -5.2770 | -1.6312 | 1.9415  | C  | -5.2176 | 1.3463  | -3.8886 | H  | 2.7401  | 4.0256  | -4.5418 |
| C  | -5.1973 | -0.2462 | 2.1238  | C  | -4.3927 | 1.5945  | -2.7926 | H  | 2.4882  | 2.4918  | -2.6160 |
| C  | -1.3771 | -3.5895 | 1.0726  | C  | 1.0921  | -7.4479 | -2.9827 | H  | -7.8425 | 3.3958  | -3.1359 |
| C  | 3.7647  | 0.5599  | 1.0832  | C  | 1.7276  | -6.6213 | -3.9097 | H  | -7.0796 | 1.7807  | -4.8825 |
| C  | -2.3766 | 2.9782  | 1.0796  | C  | 1.6876  | -5.2340 | -3.7619 | H  | -4.8955 | 0.6409  | -4.6513 |
| C  | 4.9773  | 0.7200  | 1.7767  | C  | 1.0143  | -4.6442 | -2.6929 | H  | -3.4368 | 1.0837  | -2.7012 |
| C  | 5.9472  | 1.5937  | 1.2952  | O  | 0.4878  | -8.4256 | 0.2313  | H  | 1.1156  | -8.5304 | -3.0817 |
| C  | 5.6817  | 2.2968  | 0.1302  | O  | -1.6298 | -8.3715 | -1.1429 | H  | 2.2582  | -7.0618 | -4.7504 |
| C  | 4.4828  | 2.1440  | -0.5807 | O  | 6.8816  | 4.6861  | 0.1779  | H  | 2.1908  | -4.6021 | -4.4902 |
| C  | 3.5199  | 1.2686  | -0.1022 | O  | 7.9583  | 2.8442  | -1.1694 | H  | 0.9962  | -3.5616 | -2.5895 |

|                               | $\varphi_1$ | $\varphi_2$ | $\varphi_3$ |
|-------------------------------|-------------|-------------|-------------|
| GS <sup>SYM</sup>             | 57.29       | 57.29       | 57.29       |
| S <sub>1</sub> <sup>SYM</sup> | 67.27       | 67.27       | 67.27       |
| S <sub>1</sub> <sup>MIN</sup> | 77.47       | 61.04       | 59.84       |
| S <sub>1</sub> <sup>LVC</sup> | 66.59       | 62.88       | 60.98       |
| T <sub>1</sub> <sup>MIN</sup> | 52.51       | 54.47       | 50.88       |

**Table S14:** Rotation coordinates  $\varphi$  of TAT-3DBTO<sub>2</sub>.

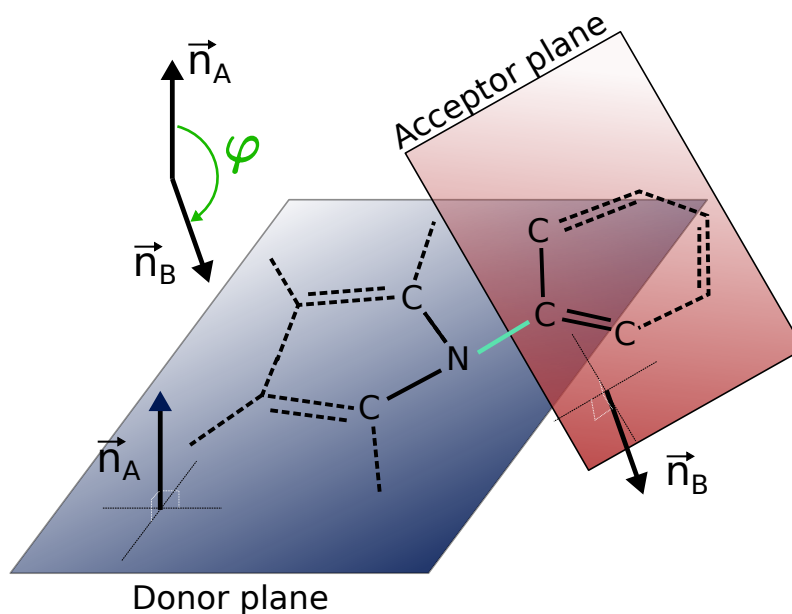

**Figure S2:** Definition of the Donor-Acceptor torsion angle  $\varphi$ .  $\vec{n}_A$  and  $\vec{n}_B$  are the normal vectors to the donor and acceptor units, respectively.

## S2-2 Electronic Structure

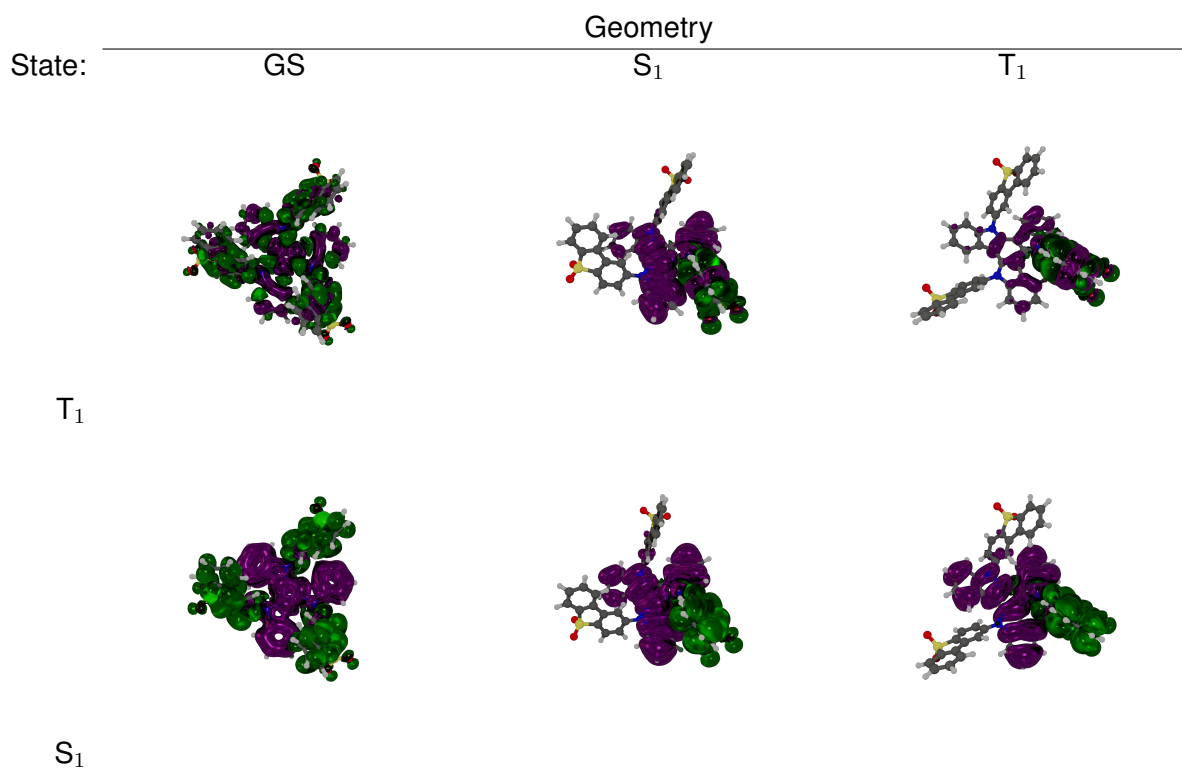

**Figure S3:** Difference of electronic density associated to the  $T_1 \leftarrow GS$  (top) and  $S_1 \leftarrow GS$  (bottom) at the ground state optimised geometry (left) the  $S_1$  minimum (centre) and the  $T_1$  minimum (right). Purple: loss of electronic density. Green: gain.

## S2-3 LVC parameters

Table S15: LVC Analysis for S1 of TAT-3DBTO<sub>2</sub>.

| $\alpha$ | Freq. /cm <sup>-1</sup> | $\kappa_{\alpha}$       |          |        | $\kappa_{\alpha}^*$     |          |        | $\xi$  |
|----------|-------------------------|-------------------------|----------|--------|-------------------------|----------|--------|--------|
|          |                         | $\kappa_{\alpha}$ / meV | dE / meV | dQ     | $\kappa_{\alpha}$ / meV | dE / meV | dQ     |        |
| 1        | 7.27                    | 2.244                   | -0.103   | -2.489 | -1.930                  | -0.076   | 2.140  | 0.004  |
| 2        | 8.11                    | 0.904                   | -0.015   | -0.900 | -0.021                  | -0.000   | 0.021  | 0.001  |
| 3        | 13.90                   | 6.964                   | -0.517   | -4.040 | 10.845                  | -1.254   | -6.291 | -0.003 |
| 4        | 16.87                   | -2.219                  | -0.043   | 1.061  | -6.322                  | -0.351   | 3.022  | 0.003  |
| 5        | 20.01                   | -0.904                  | -0.006   | 0.364  | -9.645                  | -0.689   | 3.888  | 0.007  |
| 6        | 21.72                   | -0.536                  | -0.002   | 0.199  | -11.714                 | -0.936   | 4.350  | 0.009  |
| 7        | 26.17                   | 2.755                   | -0.043   | -0.849 | 6.008                   | -0.204   | -1.851 | -0.003 |
| 8        | 27.20                   | 5.955                   | -0.193   | -1.766 | 13.579                  | -1.005   | -4.027 | -0.006 |
| 9        | 27.28                   | -5.387                  | -0.158   | 1.593  | -1.880                  | -0.019   | 0.556  | -0.003 |
| 10       | 52.89                   | 1.683                   | -0.008   | -0.257 | 7.781                   | -0.170   | -1.187 | -0.005 |
| 11       | 53.53                   | 1.155                   | -0.004   | -0.174 | 6.529                   | -0.118   | -0.984 | -0.005 |
| 12       | 54.84                   | 1.215                   | -0.004   | -0.179 | -3.222                  | -0.028   | 0.474  | 0.004  |
| 13       | 81.36                   | -0.807                  | -0.001   | 0.080  | 0.000                   | -0.000   | -0.000 | -0.001 |
| 14       | 82.52                   | 0.377                   | -0.000   | -0.037 | -2.820                  | -0.014   | 0.276  | 0.003  |
| 15       | 83.34                   | -0.054                  | -0.000   | 0.005  | 3.926                   | -0.027   | -0.380 | -0.003 |
| 16       | 92.20                   | -0.164                  | -0.000   | 0.014  | 7.464                   | -0.090   | -0.653 | -0.006 |
| 17       | 92.59                   | -0.193                  | -0.000   | 0.017  | 3.230                   | -0.017   | -0.281 | -0.003 |
| 18       | 98.64                   | -6.598                  | -0.065   | 0.540  | -7.699                  | -0.089   | 0.630  | 0.001  |
| 19       | 106.64                  | -6.629                  | -0.061   | 0.501  | -4.360                  | -0.026   | 0.330  | -0.002 |
| 20       | 113.36                  | 1.293                   | -0.002   | -0.092 | -9.483                  | -0.118   | 0.675  | 0.009  |
| 21       | 114.43                  | -0.996                  | -0.001   | 0.070  | -7.869                  | -0.080   | 0.555  | 0.006  |
| 22       | 122.31                  | 0.897                   | -0.001   | -0.059 | -4.205                  | -0.021   | 0.277  | 0.004  |
| 23       | 123.08                  | 0.848                   | -0.001   | -0.056 | 14.951                  | -0.269   | -0.980 | -0.012 |
| 24       | 124.37                  | 10.782                  | -0.139   | -0.699 | 26.701                  | -0.850   | -1.732 | -0.013 |
| 25       | 135.02                  | 6.728                   | -0.050   | -0.402 | -8.045                  | -0.071   | 0.481  | 0.012  |
| 26       | 144.39                  | 0.151                   | -0.000   | -0.008 | -10.176                 | -0.106   | 0.568  | 0.009  |
| 27       | 144.89                  | -0.052                  | -0.000   | 0.003  | -10.467                 | -0.112   | 0.583  | 0.009  |
| 28       | 158.02                  | -0.343                  | -0.000   | 0.018  | 10.037                  | -0.094   | -0.512 | -0.009 |
| 29       | 159.46                  | 0.369                   | -0.000   | -0.019 | 8.140                   | -0.062   | -0.412 | -0.007 |
| 30       | 161.93                  | -2.310                  | -0.005   | 0.115  | 1.965                   | -0.004   | -0.098 | -0.004 |
| 31       | 173.08                  | 0.975                   | -0.001   | -0.045 | -7.487                  | -0.048   | 0.349  | 0.007  |
| 32       | 173.40                  | 0.272                   | -0.000   | -0.013 | -4.143                  | -0.015   | 0.193  | 0.004  |
| 33       | 174.49                  | 9.308                   | -0.074   | -0.430 | 4.381                   | -0.016   | -0.203 | 0.004  |
| 34       | 190.80                  | -0.189                  | -0.000   | 0.008  | 12.709                  | -0.125   | -0.537 | -0.011 |
| 35       | 191.18                  | 0.058                   | -0.000   | -0.002 | 10.231                  | -0.081   | -0.432 | -0.009 |
| 36       | 236.90                  | -0.551                  | -0.000   | 0.019  | -7.480                  | -0.035   | 0.255  | 0.006  |
| 37       | 237.25                  | -0.697                  | -0.000   | 0.024  | 48.286                  | -1.456   | -1.642 | -0.041 |
| 38       | 238.02                  | -2.128                  | -0.003   | 0.072  | -25.688                 | -0.411   | 0.870  | 0.020  |
| 39       | 239.23                  | 4.018                   | -0.010   | -0.135 | -47.632                 | -1.405   | 1.606  | 0.044  |
| 40       | 246.13                  | -0.242                  | -0.000   | 0.008  | 69.319                  | -2.893   | -2.272 | -0.059 |
| 41       | 246.29                  | 0.745                   | -0.000   | -0.024 | -6.211                  | -0.023   | 0.203  | 0.006  |

Continued on next page

— Continued from previous page

| $\alpha$ | Freq. /cm <sup>-1</sup> | $\kappa_{\alpha}$ / meV | dE / meV | dQ     | $\kappa_{\alpha}$ / meV | dE / meV | dQ     | $\xi$  |
|----------|-------------------------|-------------------------|----------|--------|-------------------------|----------|--------|--------|
| 42       | 257.54                  | 6.887                   | -0.027   | -0.216 | -26.333                 | -0.399   | 0.825  | 0.028  |
| 43       | 282.13                  | -0.121                  | -0.000   | 0.003  | -3.123                  | -0.005   | 0.089  | 0.003  |
| 44       | 282.85                  | 0.343                   | -0.000   | -0.010 | -18.872                 | -0.187   | 0.538  | 0.016  |
| 45       | 296.86                  | 7.952                   | -0.032   | -0.216 | 15.663                  | -0.122   | -0.426 | -0.007 |
| 46       | 302.95                  | -6.493                  | -0.021   | 0.173  | -55.137                 | -1.487   | 1.468  | 0.041  |
| 47       | 314.98                  | -0.127                  | -0.000   | 0.003  | -1.342                  | -0.001   | 0.034  | 0.001  |
| 48       | 315.29                  | 0.485                   | -0.000   | -0.012 | 19.535                  | -0.179   | -0.500 | -0.016 |
| 49       | 316.37                  | -0.769                  | -0.000   | 0.020  | -16.041                 | -0.121   | 0.409  | 0.013  |
| 50       | 330.08                  | 0.418                   | -0.000   | -0.010 | -44.607                 | -0.893   | 1.090  | 0.038  |
| 51       | 330.19                  | -0.022                  | -0.000   | 0.001  | -73.111                 | -2.399   | 1.786  | 0.062  |
| 52       | 355.94                  | -3.160                  | -0.004   | 0.072  | 92.085                  | -3.531   | -2.087 | -0.080 |
| 53       | 376.88                  | -0.387                  | -0.000   | 0.008  | 25.402                  | -0.254   | -0.544 | -0.022 |
| 54       | 377.11                  | -0.174                  | -0.000   | 0.004  | 50.190                  | -0.990   | -1.073 | -0.042 |
| 55       | 387.54                  | -6.282                  | -0.015   | 0.131  | -36.499                 | -0.509   | 0.760  | 0.025  |
| 56       | 388.06                  | -0.068                  | -0.000   | 0.001  | 67.727                  | -1.752   | -1.408 | -0.057 |
| 57       | 388.36                  | -0.589                  | -0.000   | 0.012  | 10.332                  | -0.041   | -0.215 | -0.009 |
| 58       | 399.76                  | -3.207                  | -0.004   | 0.065  | -3.299                  | -0.004   | 0.067  | 0.000  |
| 59       | 400.25                  | 8.754                   | -0.028   | -0.176 | -26.195                 | -0.254   | 0.528  | 0.029  |
| 60       | 401.14                  | 17.754                  | -0.116   | -0.357 | -12.262                 | -0.056   | 0.247  | 0.025  |
| 61       | 421.25                  | 26.768                  | -0.252   | -0.513 | -22.444                 | -0.177   | 0.430  | 0.042  |
| 62       | 423.53                  | 0.518                   | -0.000   | -0.010 | -21.079                 | -0.155   | 0.401  | 0.018  |
| 63       | 423.75                  | -2.495                  | -0.002   | 0.047  | 26.894                  | -0.253   | -0.512 | -0.025 |
| 64       | 432.77                  | 0.065                   | -0.000   | -0.001 | -26.114                 | -0.234   | 0.487  | 0.022  |
| 65       | 433.39                  | -2.551                  | -0.002   | 0.047  | 0.077                   | -0.000   | -0.001 | -0.002 |
| 66       | 434.07                  | 1.021                   | -0.000   | -0.019 | -19.612                 | -0.131   | 0.364  | 0.017  |
| 67       | 438.60                  | 21.382                  | -0.154   | -0.393 | 62.149                  | -1.305   | -1.143 | -0.034 |
| 68       | 440.61                  | 4.357                   | -0.006   | -0.080 | 17.434                  | -0.102   | -0.319 | -0.011 |
| 69       | 441.09                  | -1.409                  | -0.001   | 0.026  | 28.414                  | -0.271   | -0.520 | -0.025 |
| 70       | 457.15                  | -3.737                  | -0.005   | 0.066  | 1.126                   | -0.000   | -0.020 | -0.004 |
| 71       | 458.26                  | -1.436                  | -0.001   | 0.025  | 2.192                   | -0.002   | -0.039 | -0.003 |
| 72       | 458.74                  | -2.033                  | -0.001   | 0.036  | 5.990                   | -0.012   | -0.105 | -0.007 |
| 73       | 466.73                  | 17.881                  | -0.102   | -0.309 | 2.184                   | -0.002   | -0.038 | 0.013  |
| 74       | 470.22                  | -4.410                  | -0.006   | 0.076  | -10.757                 | -0.036   | 0.185  | 0.005  |
| 75       | 471.57                  | 1.944                   | -0.001   | -0.033 | -21.005                 | -0.139   | 0.359  | 0.019  |
| 76       | 524.06                  | 0.303                   | -0.000   | -0.005 | -56.976                 | -0.918   | 0.877  | 0.048  |
| 77       | 524.45                  | 0.130                   | -0.000   | -0.002 | -138.412                | -5.414   | 2.129  | 0.117  |
| 78       | 527.57                  | -4.571                  | -0.006   | 0.070  | -125.694                | -4.438   | 1.922  | 0.102  |
| 79       | 549.92                  | 0.209                   | -0.000   | -0.003 | 15.368                  | -0.064   | -0.225 | -0.013 |
| 80       | 550.27                  | -0.275                  | -0.000   | 0.004  | 15.085                  | -0.061   | -0.221 | -0.013 |
| 81       | 552.21                  | 2.430                   | -0.002   | -0.035 | -13.208                 | -0.047   | 0.193  | 0.013  |
| 82       | 561.63                  | -0.007                  | -0.000   | 0.000  | -103.099                | -2.805   | 1.481  | 0.087  |
| 83       | 561.88                  | 0.319                   | -0.000   | -0.005 | -52.710                 | -0.733   | 0.757  | 0.045  |
| 84       | 566.34                  | 8.417                   | -0.019   | -0.120 | 149.929                 | -5.882   | -2.135 | -0.119 |
| 85       | 568.88                  | 0.408                   | -0.000   | -0.006 | -147.996                | -5.706   | 2.098  | 0.125  |

Continued on next page



— Continued from previous page

| $\alpha$ | Freq. /cm <sup>-1</sup> | $\kappa_\alpha$ / meV | dE / meV | dQ     | $\kappa_\alpha$ / meV | dE / meV | dQ     | $\xi$  |
|----------|-------------------------|-----------------------|----------|--------|-----------------------|----------|--------|--------|
| 86       | 569.06                  | -0.019                | -0.000   | 0.000  | 12.189                | -0.039   | -0.173 | -0.010 |
| 87       | 579.70                  | -1.998                | -0.001   | 0.028  | 15.319                | -0.060   | -0.213 | -0.015 |
| 88       | 582.59                  | 14.425                | -0.053   | -0.200 | 18.264                | -0.085   | -0.253 | -0.003 |
| 89       | 583.44                  | 1.393                 | -0.000   | -0.019 | 27.528                | -0.192   | -0.381 | -0.022 |
| 90       | 583.55                  | -0.490                | -0.000   | 0.007  | 35.416                | -0.319   | -0.490 | -0.030 |
| 91       | 587.01                  | 0.007                 | -0.000   | -0.000 | 8.117                 | -0.017   | -0.112 | -0.007 |
| 92       | 587.21                  | 0.635                 | -0.000   | -0.009 | 27.551                | -0.192   | -0.378 | -0.023 |
| 93       | 602.16                  | 0.369                 | -0.000   | -0.005 | 10.198                | -0.026   | -0.137 | -0.008 |
| 94       | 602.50                  | -0.387                | -0.000   | 0.005  | 12.092                | -0.036   | -0.162 | -0.011 |
| 95       | 605.02                  | -3.793                | -0.004   | 0.051  | 13.568                | -0.045   | -0.181 | -0.015 |
| 96       | 635.75                  | -1.739                | -0.001   | 0.022  | 7.172                 | -0.012   | -0.091 | -0.008 |
| 97       | 636.58                  | 0.983                 | -0.000   | -0.012 | 11.612                | -0.031   | -0.147 | -0.009 |
| 98       | 637.27                  | -5.848                | -0.008   | 0.074  | -8.634                | -0.017   | 0.109  | 0.002  |
| 99       | 650.33                  | -7.018                | -0.011   | 0.087  | -39.048               | -0.347   | 0.484  | 0.027  |
| 100      | 664.36                  | 0.410                 | -0.000   | -0.005 | 16.303                | -0.059   | -0.198 | -0.013 |
| 101      | 664.52                  | -0.061                | -0.000   | 0.001  | -40.083               | -0.358   | 0.487  | 0.034  |
| 102      | 676.77                  | 14.788                | -0.048   | -0.176 | 3.346                 | -0.002   | -0.040 | 0.010  |
| 103      | 687.01                  | 0.468                 | -0.000   | -0.005 | 20.600                | -0.092   | -0.242 | -0.017 |
| 104      | 687.30                  | -0.202                | -0.000   | 0.002  | -98.980               | -2.113   | 1.162  | 0.083  |
| 105      | 694.66                  | 0.063                 | -0.000   | -0.001 | -1.808                | -0.001   | 0.021  | 0.002  |
| 106      | 694.99                  | 0.195                 | -0.000   | -0.002 | 29.029                | -0.180   | -0.337 | -0.024 |
| 107      | 716.02                  | 5.884                 | -0.007   | -0.066 | -208.221              | -8.974   | 2.345  | 0.181  |
| 108      | 722.39                  | 0.025                 | -0.000   | -0.000 | -197.780              | -8.025   | 2.208  | 0.167  |
| 109      | 722.64                  | 0.160                 | -0.000   | -0.002 | 169.449               | -5.889   | -1.891 | -0.143 |
| 110      | 729.09                  | -0.940                | -0.000   | 0.010  | 104.494               | -2.219   | -1.156 | -0.089 |
| 111      | 735.06                  | 12.061                | -0.029   | -0.132 | 6.917                 | -0.010   | -0.076 | 0.004  |
| 112      | 735.40                  | 2.969                 | -0.002   | -0.033 | -21.452               | -0.093   | 0.235  | 0.021  |
| 113      | 735.55                  | 2.043                 | -0.001   | -0.022 | -3.387                | -0.002   | 0.037  | 0.005  |
| 114      | 746.86                  | -1.807                | -0.001   | 0.020  | 17.752                | -0.063   | -0.192 | -0.016 |
| 115      | 747.53                  | -8.394                | -0.014   | 0.091  | 51.190                | -0.520   | -0.552 | -0.050 |
| 116      | 748.16                  | 2.572                 | -0.001   | -0.028 | -28.400               | -0.160   | 0.306  | 0.026  |
| 117      | 748.59                  | -0.426                | -0.000   | 0.005  | -23.836               | -0.112   | 0.257  | 0.020  |
| 118      | 751.20                  | -1.237                | -0.000   | 0.013  | 54.847                | -0.593   | -0.589 | -0.047 |
| 119      | 751.48                  | 0.780                 | -0.000   | -0.008 | 121.812               | -2.926   | -1.307 | -0.102 |
| 120      | 763.59                  | -0.469                | -0.000   | 0.005  | -8.289                | -0.013   | 0.088  | 0.007  |
| 121      | 764.85                  | 0.583                 | -0.000   | -0.006 | 28.755                | -0.160   | -0.303 | -0.024 |
| 122      | 766.37                  | -1.553                | -0.000   | 0.016  | -26.601               | -0.137   | 0.280  | 0.021  |
| 123      | 768.16                  | 0.383                 | -0.000   | -0.004 | -16.875               | -0.055   | 0.177  | 0.015  |
| 124      | 768.93                  | 0.450                 | -0.000   | -0.005 | 11.268                | -0.024   | -0.118 | -0.009 |
| 125      | 773.12                  | 7.529                 | -0.011   | -0.079 | 25.264                | -0.122   | -0.264 | -0.015 |
| 126      | 779.85                  | 0.747                 | -0.000   | -0.008 | 2.431                 | -0.001   | -0.025 | -0.001 |
| 127      | 780.27                  | -0.522                | -0.000   | 0.005  | 1.400                 | -0.000   | -0.014 | -0.002 |
| 128      | 780.68                  | -0.588                | -0.000   | 0.006  | 7.199                 | -0.010   | -0.074 | -0.007 |
| 129      | 791.90                  | -12.865               | -0.031   | 0.131  | -47.565               | -0.423   | 0.484  | 0.029  |

Continued on next page



— Continued from previous page

| $\alpha$ | Freq. /cm <sup>-1</sup> | $\kappa_{\alpha}$ / meV | dE / meV | dQ     | $\kappa_{\alpha}$ / meV | dE / meV | dQ     | $\xi$  |
|----------|-------------------------|-------------------------|----------|--------|-------------------------|----------|--------|--------|
| 130      | 817.63                  | -1.362                  | -0.000   | 0.013  | 25.409                  | -0.117   | -0.251 | -0.023 |
| 131      | 818.00                  | 0.038                   | -0.000   | -0.000 | -31.371                 | -0.178   | 0.309  | 0.026  |
| 132      | 822.08                  | 16.175                  | -0.047   | -0.159 | 72.671                  | -0.952   | -0.713 | -0.048 |
| 133      | 841.82                  | 9.431                   | -0.016   | -0.090 | -8.344                  | -0.012   | 0.080  | 0.015  |
| 134      | 846.29                  | -0.198                  | -0.000   | 0.002  | 26.664                  | -0.125   | -0.254 | -0.023 |
| 135      | 846.72                  | 0.488                   | -0.000   | -0.005 | 3.870                   | -0.003   | -0.037 | -0.003 |
| 136      | 864.66                  | 0.277                   | -0.000   | -0.003 | -14.931                 | -0.038   | 0.139  | 0.013  |
| 137      | 864.77                  | 0.003                   | -0.000   | -0.000 | -19.354                 | -0.064   | 0.181  | 0.016  |
| 138      | 870.78                  | -2.394                  | -0.001   | 0.022  | -8.878                  | -0.013   | 0.082  | 0.005  |
| 139      | 873.30                  | -1.898                  | -0.001   | 0.018  | -1.167                  | -0.000   | 0.011  | -0.001 |
| 140      | 873.69                  | 1.554                   | -0.000   | -0.014 | 4.100                   | -0.003   | -0.038 | -0.002 |
| 141      | 883.61                  | 0.018                   | -0.000   | -0.000 | -6.145                  | -0.006   | 0.056  | 0.005  |
| 142      | 884.81                  | -1.653                  | -0.000   | 0.015  | 9.598                   | -0.015   | -0.087 | -0.009 |
| 143      | 885.54                  | -2.465                  | -0.001   | 0.022  | 10.419                  | -0.018   | -0.095 | -0.011 |
| 144      | 886.51                  | 1.843                   | -0.001   | -0.017 | -6.127                  | -0.006   | 0.056  | 0.007  |
| 145      | 903.66                  | 0.033                   | -0.000   | -0.000 | 8.553                   | -0.012   | -0.076 | -0.007 |
| 146      | 907.01                  | -0.895                  | -0.000   | 0.008  | -3.371                  | -0.002   | 0.030  | 0.002  |
| 147      | 922.64                  | 5.243                   | -0.004   | -0.046 | -10.175                 | -0.017   | 0.089  | 0.013  |
| 148      | 944.10                  | -0.325                  | -0.000   | 0.003  | -0.143                  | -0.000   | 0.001  | -0.000 |
| 149      | 947.35                  | -0.824                  | -0.000   | 0.007  | -1.784                  | -0.000   | 0.015  | 0.001  |
| 150      | 947.67                  | 0.874                   | -0.000   | -0.007 | -4.464                  | -0.003   | 0.038  | 0.005  |
| 151      | 955.74                  | -0.593                  | -0.000   | 0.005  | -1.031                  | -0.000   | 0.009  | 0.000  |
| 152      | 956.71                  | -0.792                  | -0.000   | 0.007  | -0.265                  | -0.000   | 0.002  | -0.000 |
| 153      | 957.63                  | 0.670                   | -0.000   | -0.006 | -0.888                  | -0.000   | 0.007  | 0.001  |
| 154      | 966.18                  | 0.397                   | -0.000   | -0.003 | 2.601                   | -0.001   | -0.022 | -0.002 |
| 155      | 966.88                  | 0.948                   | -0.000   | -0.008 | -4.987                  | -0.004   | 0.042  | 0.005  |
| 156      | 969.85                  | -2.977                  | -0.001   | 0.025  | -5.054                  | -0.004   | 0.042  | 0.002  |
| 157      | 973.07                  | 0.152                   | -0.000   | -0.001 | -1.172                  | -0.000   | 0.010  | 0.001  |
| 158      | 973.87                  | 0.863                   | -0.000   | -0.007 | -0.988                  | -0.000   | 0.008  | 0.002  |
| 159      | 986.34                  | -1.084                  | -0.000   | 0.009  | -1.305                  | -0.000   | 0.011  | 0.000  |
| 160      | 987.22                  | -2.465                  | -0.001   | 0.020  | -2.968                  | -0.001   | 0.024  | 0.000  |
| 161      | 989.08                  | -2.710                  | -0.001   | 0.022  | -1.444                  | -0.000   | 0.012  | -0.001 |
| 162      | 991.75                  | 9.104                   | -0.012   | -0.074 | 13.910                  | -0.029   | -0.113 | -0.004 |
| 163      | 1000.97                 | 0.223                   | -0.000   | -0.002 | 0.044                   | -0.000   | -0.000 | 0.000  |
| 164      | 1001.29                 | -0.243                  | -0.000   | 0.002  | -0.183                  | -0.000   | 0.001  | -0.000 |
| 165      | 1001.43                 | 0.303                   | -0.000   | -0.002 | 0.371                   | -0.000   | -0.003 | -0.000 |
| 166      | 1021.10                 | -4.316                  | -0.003   | 0.034  | -32.622                 | -0.154   | 0.258  | 0.024  |
| 167      | 1041.47                 | 0.634                   | -0.000   | -0.005 | 53.318                  | -0.405   | -0.413 | -0.044 |
| 168      | 1041.70                 | 1.161                   | -0.000   | -0.009 | -80.564                 | -0.923   | 0.624  | 0.069  |
| 169      | 1045.35                 | -19.109                 | -0.052   | 0.147  | 77.279                  | -0.847   | -0.596 | -0.081 |
| 170      | 1065.08                 | 2.850                   | -0.001   | -0.022 | -6.918                  | -0.007   | 0.052  | 0.008  |
| 171      | 1065.36                 | 3.257                   | -0.001   | -0.025 | 1.995                   | -0.001   | -0.015 | 0.001  |
| 172      | 1066.31                 | -4.539                  | -0.003   | 0.034  | 138.078                 | -2.650   | -1.044 | -0.120 |
| 173      | 1069.59                 | -3.359                  | -0.002   | 0.025  | 114.805                 | -1.826   | -0.866 | -0.100 |

Continued on next page

— Continued from previous page

| $\alpha$ | Freq. /cm <sup>-1</sup> | $\kappa_{\alpha}$ / meV | dE / meV | dQ     | $\kappa_{\alpha}$ / meV | dE / meV | dQ     | $\xi$  |
|----------|-------------------------|-------------------------|----------|--------|-------------------------|----------|--------|--------|
| 174      | 1070.23                 | -0.672                  | -0.000   | 0.005  | 43.484                  | -0.262   | -0.328 | -0.037 |
| 175      | 1073.13                 | -18.074                 | -0.045   | 0.136  | -236.342                | -7.714   | 1.776  | 0.184  |
| 176      | 1073.45                 | -2.455                  | -0.001   | 0.018  | -231.412                | -7.393   | 1.739  | 0.193  |
| 177      | 1074.18                 | -0.714                  | -0.000   | 0.005  | 24.796                  | -0.085   | -0.186 | -0.022 |
| 178      | 1077.59                 | -9.424                  | -0.012   | 0.071  | 84.085                  | -0.972   | -0.629 | -0.079 |
| 179      | 1105.88                 | 0.927                   | -0.000   | -0.007 | 146.308                 | -2.869   | -1.067 | -0.123 |
| 180      | 1106.40                 | 0.134                   | -0.000   | -0.001 | -1.997                  | -0.001   | 0.015  | 0.002  |
| 181      | 1117.87                 | -6.318                  | -0.005   | 0.046  | -74.945                 | -0.745   | 0.541  | 0.058  |
| 182      | 1118.34                 | 6.229                   | -0.005   | -0.045 | 7.537                   | -0.008   | -0.054 | -0.001 |
| 183      | 1118.54                 | -5.933                  | -0.005   | 0.043  | 1.197                   | -0.000   | -0.009 | -0.006 |
| 184      | 1152.97                 | 3.165                   | -0.001   | -0.022 | 21.739                  | -0.061   | -0.152 | -0.016 |
| 185      | 1153.11                 | 0.499                   | -0.000   | -0.003 | -18.172                 | -0.042   | 0.127  | 0.016  |
| 186      | 1153.95                 | -10.975                 | -0.015   | 0.077  | -283.698                | -10.337  | 1.983  | 0.230  |
| 187      | 1154.44                 | 20.011                  | -0.051   | -0.140 | -177.637                | -4.051   | 1.241  | 0.167  |
| 188      | 1159.31                 | 0.197                   | -0.000   | -0.001 | 7.834                   | -0.008   | -0.055 | -0.006 |
| 189      | 1160.58                 | 0.950                   | -0.000   | -0.007 | 26.454                  | -0.089   | -0.184 | -0.022 |
| 190      | 1170.62                 | -3.789                  | -0.002   | 0.026  | -16.219                 | -0.033   | 0.112  | 0.010  |
| 191      | 1172.52                 | -5.468                  | -0.004   | 0.038  | 250.761                 | -7.948   | -1.725 | -0.216 |
| 192      | 1172.95                 | -9.085                  | -0.010   | 0.062  | 54.037                  | -0.369   | -0.372 | -0.053 |
| 193      | 1182.93                 | 11.610                  | -0.017   | -0.079 | 31.545                  | -0.125   | -0.215 | -0.017 |
| 194      | 1183.19                 | 22.205                  | -0.062   | -0.151 | 48.592                  | -0.296   | -0.331 | -0.022 |
| 195      | 1183.97                 | -24.310                 | -0.074   | 0.166  | 531.887                 | -35.412  | -3.623 | -0.469 |
| 196      | 1190.59                 | -0.441                  | -0.000   | 0.003  | 11.098                  | -0.015   | -0.075 | -0.010 |
| 197      | 1191.65                 | -1.986                  | -0.000   | 0.013  | -34.042                 | -0.144   | 0.230  | 0.027  |
| 198      | 1193.71                 | -2.976                  | -0.001   | 0.020  | -50.815                 | -0.321   | 0.343  | 0.040  |
| 199      | 1196.27                 | 3.495                   | -0.002   | -0.024 | 5.859                   | -0.004   | -0.040 | -0.002 |
| 200      | 1197.77                 | -4.317                  | -0.002   | 0.029  | 0.718                   | -0.000   | -0.005 | -0.004 |
| 201      | 1197.84                 | -3.350                  | -0.001   | 0.023  | -67.403                 | -0.562   | 0.454  | 0.054  |
| 202      | 1226.69                 | 8.051                   | -0.008   | -0.053 | -7.561                  | -0.007   | 0.050  | 0.013  |
| 203      | 1232.76                 | 1.571                   | -0.000   | -0.010 | 11.161                  | -0.015   | -0.073 | -0.008 |
| 204      | 1233.13                 | -0.074                  | -0.000   | 0.000  | -22.238                 | -0.059   | 0.145  | 0.019  |
| 205      | 1263.96                 | 1.898                   | -0.000   | -0.012 | 37.661                  | -0.166   | -0.240 | -0.030 |
| 206      | 1264.11                 | -2.427                  | -0.001   | 0.015  | -21.327                 | -0.053   | 0.136  | 0.016  |
| 207      | 1264.50                 | -2.746                  | -0.001   | 0.018  | 7.609                   | -0.007   | -0.049 | -0.009 |
| 208      | 1273.51                 | -55.839                 | -0.363   | 0.354  | -56.956                 | -0.378   | 0.361  | 0.001  |
| 209      | 1278.05                 | 5.136                   | -0.003   | -0.032 | 7.074                   | -0.006   | -0.045 | -0.002 |
| 210      | 1279.72                 | -2.312                  | -0.001   | 0.015  | 19.546                  | -0.044   | -0.123 | -0.018 |
| 211      | 1298.93                 | -4.774                  | -0.003   | 0.030  | -21.549                 | -0.053   | 0.134  | 0.014  |
| 212      | 1299.78                 | 2.417                   | -0.001   | -0.015 | 20.903                  | -0.050   | -0.130 | -0.016 |
| 213      | 1303.02                 | 28.804                  | -0.094   | -0.178 | 38.099                  | -0.165   | -0.236 | -0.008 |
| 214      | 1320.43                 | 0.404                   | -0.000   | -0.002 | -21.905                 | -0.054   | 0.134  | 0.019  |
| 215      | 1321.18                 | -1.625                  | -0.000   | 0.010  | -51.796                 | -0.301   | 0.316  | 0.042  |
| 216      | 1329.62                 | 47.606                  | -0.253   | -0.289 | -42.115                 | -0.198   | 0.255  | 0.076  |
| 217      | 1340.08                 | -6.087                  | -0.004   | 0.037  | -21.094                 | -0.049   | 0.127  | 0.013  |

Continued on next page

— Continued from previous page

| $\alpha$ | Freq. /cm <sup>-1</sup> | $\kappa_{\alpha}$ / meV | dE / meV | dQ     | $\kappa_{\alpha}$ / meV | dE / meV | dQ     | $\xi$  |
|----------|-------------------------|-------------------------|----------|--------|-------------------------|----------|--------|--------|
| 218      | 1340.90                 | 3.611                   | -0.001   | -0.022 | 18.717                  | -0.039   | -0.113 | -0.013 |
| 219      | 1345.20                 | 35.427                  | -0.138   | -0.212 | 46.388                  | -0.237   | -0.278 | -0.009 |
| 220      | 1345.97                 | 2.715                   | -0.001   | -0.016 | 4.376                   | -0.002   | -0.026 | -0.001 |
| 221      | 1347.47                 | -1.234                  | -0.000   | 0.007  | 148.006                 | -2.409   | -0.886 | -0.126 |
| 222      | 1348.19                 | 0.117                   | -0.000   | -0.001 | 0.001                   | -0.000   | -0.000 | 0.000  |
| 223      | 1363.49                 | -30.373                 | -0.100   | 0.180  | -10.860                 | -0.013   | 0.064  | -0.016 |
| 224      | 1367.79                 | -3.864                  | -0.002   | 0.023  | 23.182                  | -0.058   | -0.137 | -0.023 |
| 225      | 1368.57                 | -0.884                  | -0.000   | 0.005  | 11.793                  | -0.015   | -0.070 | -0.011 |
| 226      | 1374.91                 | -1.920                  | -0.000   | 0.011  | -11.366                 | -0.014   | 0.067  | 0.008  |
| 227      | 1377.40                 | 0.189                   | -0.000   | -0.001 | -12.469                 | -0.017   | 0.073  | 0.011  |
| 228      | 1377.90                 | -0.002                  | -0.000   | 0.000  | 41.345                  | -0.184   | -0.242 | -0.035 |
| 229      | 1404.14                 | 29.202                  | -0.090   | -0.168 | 32.113                  | -0.109   | -0.184 | -0.002 |
| 230      | 1404.52                 | 13.054                  | -0.018   | -0.075 | 5.321                   | -0.003   | -0.031 | 0.007  |
| 231      | 1405.17                 | -8.080                  | -0.007   | 0.046  | 4.099                   | -0.002   | -0.024 | -0.010 |
| 232      | 1405.66                 | 12.616                  | -0.017   | -0.072 | 3.194                   | -0.001   | -0.018 | 0.008  |
| 233      | 1419.71                 | -0.158                  | -0.000   | 0.001  | -18.686                 | -0.036   | 0.106  | 0.016  |
| 234      | 1420.16                 | -0.681                  | -0.000   | 0.004  | 4.248                   | -0.002   | -0.024 | -0.004 |
| 235      | 1441.10                 | -28.106                 | -0.081   | 0.157  | -42.911                 | -0.189   | 0.240  | 0.012  |
| 236      | 1448.95                 | 2.434                   | -0.001   | -0.014 | 6.674                   | -0.005   | -0.037 | -0.004 |
| 237      | 1449.72                 | -0.689                  | -0.000   | 0.004  | -23.701                 | -0.057   | 0.132  | 0.019  |
| 238      | 1464.10                 | -0.729                  | -0.000   | 0.004  | -13.939                 | -0.020   | 0.077  | 0.011  |
| 239      | 1473.54                 | 15.966                  | -0.026   | -0.087 | 21.843                  | -0.048   | -0.120 | -0.005 |
| 240      | 1476.37                 | -4.182                  | -0.002   | 0.023  | -5.816                  | -0.003   | 0.032  | 0.001  |
| 241      | 1477.19                 | -0.990                  | -0.000   | 0.005  | 4.546                   | -0.002   | -0.025 | -0.005 |
| 242      | 1493.29                 | -18.519                 | -0.034   | 0.100  | -17.281                 | -0.030   | 0.093  | -0.001 |
| 243      | 1494.02                 | 15.783                  | -0.025   | -0.085 | 76.969                  | -0.588   | -0.416 | -0.052 |
| 244      | 1495.20                 | 15.273                  | -0.023   | -0.082 | -2.616                  | -0.001   | 0.014  | 0.015  |
| 245      | 1511.57                 | 18.247                  | -0.033   | -0.097 | 20.021                  | -0.039   | -0.107 | -0.001 |
| 246      | 1516.07                 | 3.630                   | -0.001   | -0.019 | 40.288                  | -0.159   | -0.214 | -0.031 |
| 247      | 1516.86                 | 0.312                   | -0.000   | -0.002 | -1.287                  | -0.000   | 0.007  | 0.001  |
| 248      | 1528.07                 | 2.363                   | -0.001   | -0.012 | 1.410                   | -0.000   | -0.007 | 0.001  |
| 249      | 1529.43                 | 1.538                   | -0.000   | -0.008 | -28.091                 | -0.076   | 0.148  | 0.025  |
| 250      | 1529.79                 | -10.802                 | -0.011   | 0.057  | -11.811                 | -0.014   | 0.062  | 0.001  |
| 251      | 1531.63                 | -21.074                 | -0.043   | 0.111  | -5.795                  | -0.003   | 0.031  | -0.013 |
| 252      | 1532.81                 | 27.556                  | -0.073   | -0.145 | 34.756                  | -0.117   | -0.183 | -0.006 |
| 253      | 1533.15                 | -12.260                 | -0.015   | 0.064  | -62.036                 | -0.372   | 0.326  | 0.042  |
| 254      | 1541.53                 | 22.052                  | -0.047   | -0.115 | 11.701                  | -0.013   | -0.061 | 0.009  |
| 255      | 1541.85                 | -27.373                 | -0.072   | 0.143  | -15.876                 | -0.024   | 0.083  | -0.010 |
| 256      | 1543.04                 | 27.543                  | -0.073   | -0.144 | 18.908                  | -0.034   | -0.099 | 0.007  |
| 257      | 1643.36                 | 0.964                   | -0.000   | -0.005 | -91.801                 | -0.760   | 0.451  | 0.078  |
| 258      | 1643.91                 | 0.403                   | -0.000   | -0.002 | 13.408                  | -0.016   | -0.066 | -0.011 |
| 259      | 1651.45                 | -16.117                 | -0.023   | 0.079  | -2.038                  | -0.000   | 0.010  | -0.012 |
| 260      | 1652.33                 | -11.717                 | -0.012   | 0.057  | 14.201                  | -0.018   | -0.069 | -0.022 |
| 261      | 1653.37                 | -37.076                 | -0.123   | 0.181  | -31.337                 | -0.088   | 0.153  | -0.005 |

Continued on next page

— Continued from previous page

| $\alpha$ | Freq. /cm <sup>-1</sup> | $\kappa_\alpha$ / meV | dE / meV | dQ     | $\kappa_\alpha$ / meV | dE / meV | dQ     | $\xi$  |
|----------|-------------------------|-----------------------|----------|--------|-----------------------|----------|--------|--------|
| 262      | 1655.44                 | 13.221                | -0.016   | -0.064 | 4.374                 | -0.002   | -0.021 | 0.007  |
| 263      | 1656.79                 | -6.095                | -0.003   | 0.030  | -14.555               | -0.019   | 0.071  | 0.007  |
| 264      | 1657.35                 | -4.101                | -0.002   | 0.020  | 2.537                 | -0.001   | -0.012 | -0.006 |
| 265      | 1666.68                 | 18.240                | -0.030   | -0.088 | -7.974                | -0.006   | 0.039  | 0.022  |
| 266      | 1667.73                 | -11.649               | -0.012   | 0.056  | -5.634                | -0.003   | 0.027  | -0.005 |
| 267      | 1668.39                 | -9.062                | -0.007   | 0.044  | 39.211                | -0.137   | -0.190 | -0.041 |
| 268      | 1677.73                 | -1.040                | -0.000   | 0.005  | -23.244               | -0.048   | 0.112  | 0.019  |
| 269      | 1678.79                 | -2.838                | -0.001   | 0.014  | -105.757              | -0.987   | 0.508  | 0.087  |
| 270      | 1679.09                 | -19.675               | -0.034   | 0.095  | 2.694                 | -0.001   | -0.013 | -0.019 |
| 271      | 1679.61                 | -10.213               | -0.009   | 0.049  | 52.979                | -0.248   | -0.254 | -0.053 |
| 272      | 1680.06                 | 15.749                | -0.022   | -0.076 | -45.441               | -0.182   | 0.218  | 0.052  |
| 273      | 1680.87                 | -14.608               | -0.019   | 0.070  | -15.865               | -0.022   | 0.076  | 0.001  |
| 274      | 1687.64                 | 15.102                | -0.020   | -0.072 | 32.143                | -0.091   | -0.154 | -0.014 |
| 275      | 1690.07                 | -2.553                | -0.001   | 0.012  | -28.031               | -0.069   | 0.134  | 0.021  |
| 276      | 1690.70                 | -2.321                | -0.000   | 0.011  | -38.992               | -0.133   | 0.186  | 0.031  |
| 277      | 3206.39                 | 0.375                 | -0.000   | -0.001 | 0.619                 | -0.000   | -0.002 | -0.000 |
| 278      | 3206.95                 | 0.286                 | -0.000   | -0.001 | 0.646                 | -0.000   | -0.002 | -0.000 |
| 279      | 3208.69                 | 0.207                 | -0.000   | -0.001 | 11.900                | -0.007   | -0.030 | -0.010 |
| 280      | 3208.70                 | 0.307                 | -0.000   | -0.001 | -2.816                | -0.000   | 0.007  | 0.003  |
| 281      | 3209.44                 | 0.008                 | -0.000   | -0.000 | 3.482                 | -0.001   | -0.009 | -0.003 |
| 282      | 3210.80                 | 0.285                 | -0.000   | -0.001 | -121.751              | -0.684   | 0.306  | 0.103  |
| 283      | 3218.79                 | 1.006                 | -0.000   | -0.003 | -15.080               | -0.010   | 0.038  | 0.014  |
| 284      | 3220.02                 | -0.988                | -0.000   | 0.002  | -5.779                | -0.002   | 0.014  | 0.004  |
| 285      | 3220.27                 | 1.039                 | -0.000   | -0.003 | -201.245              | -1.864   | 0.504  | 0.171  |
| 286      | 3220.51                 | 0.952                 | -0.000   | -0.002 | -15.486               | -0.011   | 0.039  | 0.014  |
| 287      | 3222.62                 | 1.469                 | -0.000   | -0.004 | 3.113                 | -0.000   | -0.008 | -0.001 |
| 288      | 3223.76                 | 1.514                 | -0.000   | -0.004 | 39.720                | -0.073   | -0.099 | -0.032 |
| 289      | 3224.21                 | 1.417                 | -0.000   | -0.004 | -0.283                | -0.000   | 0.001  | 0.001  |
| 290      | 3225.14                 | 1.150                 | -0.000   | -0.003 | -15.571               | -0.011   | 0.039  | 0.014  |
| 291      | 3225.48                 | 1.665                 | -0.000   | -0.004 | -97.044               | -0.433   | 0.243  | 0.083  |
| 292      | 3227.06                 | 0.506                 | -0.000   | -0.001 | 7.187                 | -0.002   | -0.018 | -0.006 |
| 293      | 3227.43                 | -0.567                | -0.000   | 0.001  | -1.292                | -0.000   | 0.003  | 0.001  |
| 294      | 3229.46                 | -0.317                | -0.000   | 0.001  | -150.385              | -1.038   | 0.376  | 0.127  |
| 295      | 3229.90                 | 2.306                 | -0.000   | -0.006 | -12.881               | -0.008   | 0.032  | 0.013  |
| 296      | 3230.22                 | 2.396                 | -0.000   | -0.006 | -13.541               | -0.008   | 0.034  | 0.013  |
| 297      | 3232.20                 | -3.892                | -0.001   | 0.010  | 2.432                 | -0.000   | -0.006 | -0.005 |
| 298      | 3232.93                 | 0.758                 | -0.000   | -0.002 | 126.617               | -0.735   | -0.316 | -0.106 |
| 299      | 3233.32                 | 4.557                 | -0.001   | -0.011 | -151.364              | -1.050   | 0.378  | 0.132  |
| 300      | 3235.66                 | -3.097                | -0.000   | 0.008  | -12.834               | -0.008   | 0.032  | 0.008  |
| 301      | 3236.56                 | 0.649                 | -0.000   | -0.002 | -22.459               | -0.023   | 0.056  | 0.019  |
| 302      | 3237.23                 | 0.920                 | -0.000   | -0.002 | -8.600                | -0.003   | 0.021  | 0.008  |
| 303      | 3237.54                 | -1.659                | -0.000   | 0.004  | 49.861                | -0.114   | -0.124 | -0.043 |
| 304      | 3237.60                 | -0.353                | -0.000   | 0.001  | 319.254               | -4.666   | -0.795 | -0.270 |
| 305      | 3238.62                 | -0.909                | -0.000   | 0.002  | -253.577              | -2.942   | 0.632  | 0.213  |

Continued on next page

— Continued from previous page

| $\alpha$ | Freq. /cm <sup>-1</sup> | $\kappa_\alpha$ / meV | dE / meV | dQ     | $\kappa_\alpha$ / meV | dE / meV | dQ     | $\xi$  |
|----------|-------------------------|-----------------------|----------|--------|-----------------------|----------|--------|--------|
| 306      | 3238.77                 | 2.257                 | -0.000   | -0.006 | 16.992                | -0.013   | -0.042 | -0.012 |
| 307      | 3266.38                 | 0.471                 | -0.000   | -0.001 | 2.266                 | -0.000   | -0.006 | -0.002 |
| 308      | 3271.98                 | -0.939                | -0.000   | 0.002  | -12.460               | -0.007   | 0.031  | 0.010  |
| 309      | 3272.58                 | 1.447                 | -0.000   | -0.004 | 12.123                | -0.007   | -0.030 | -0.009 |

**Table S16:** LVC Analysis for T1 of TAT-3DBTO<sub>2</sub>.

| $\alpha$ | Freq. /cm <sup>-1</sup> | $\kappa_\alpha$       |          |        | $\kappa_\alpha^*$     |          |        | $\xi$  |
|----------|-------------------------|-----------------------|----------|--------|-----------------------|----------|--------|--------|
|          |                         | $\kappa_\alpha$ / meV | dE / meV | dQ     | $\kappa_\alpha$ / meV | dE / meV | dQ     |        |
| 1        | 7.27                    | -0.098                | -0.000   | 0.108  | 0.478                 | -0.005   | -0.530 | -0.003 |
| 2        | 8.11                    | 1.116                 | -0.023   | -1.111 | 0.492                 | -0.004   | -0.489 | 0.003  |
| 3        | 13.90                   | -2.647                | -0.075   | 1.535  | -2.561                | -0.070   | 1.485  | -0.000 |
| 4        | 16.87                   | -1.329                | -0.016   | 0.635  | -0.713                | -0.004   | 0.341  | -0.003 |
| 5        | 20.01                   | -0.041                | -0.000   | 0.016  | 1.545                 | -0.018   | -0.623 | -0.007 |
| 6        | 21.72                   | -0.609                | -0.003   | 0.226  | -2.731                | -0.051   | 1.014  | 0.010  |
| 7        | 26.17                   | -0.307                | -0.001   | 0.095  | 0.178                 | -0.000   | -0.055 | -0.002 |
| 8        | 27.20                   | 0.029                 | -0.000   | -0.009 | -0.237                | -0.000   | 0.070  | 0.001  |
| 9        | 27.28                   | 0.235                 | -0.000   | -0.070 | 0.443                 | -0.001   | -0.131 | -0.001 |
| 10       | 52.89                   | -6.345                | -0.113   | 0.968  | -7.487                | -0.157   | 1.142  | 0.005  |
| 11       | 53.53                   | -3.536                | -0.035   | 0.533  | -7.213                | -0.144   | 1.087  | 0.017  |
| 12       | 54.84                   | -1.649                | -0.007   | 0.243  | 1.688                 | -0.008   | -0.248 | -0.015 |
| 13       | 81.36                   | -4.392                | -0.035   | 0.435  | -3.403                | -0.021   | 0.337  | -0.004 |
| 14       | 82.52                   | -0.703                | -0.001   | 0.069  | -2.427                | -0.011   | 0.237  | 0.008  |
| 15       | 83.34                   | 1.019                 | -0.002   | -0.099 | 3.015                 | -0.016   | -0.292 | -0.009 |
| 16       | 92.20                   | -0.164                | -0.000   | 0.014  | -2.601                | -0.011   | 0.227  | 0.011  |
| 17       | 92.59                   | 0.404                 | -0.000   | -0.035 | 0.697                 | -0.001   | -0.061 | -0.001 |
| 18       | 98.64                   | 2.577                 | -0.010   | -0.211 | 3.314                 | -0.016   | -0.271 | -0.003 |
| 19       | 106.64                  | -3.715                | -0.019   | 0.281  | -4.863                | -0.033   | 0.368  | 0.005  |
| 20       | 113.36                  | 0.895                 | -0.001   | -0.064 | 3.462                 | -0.016   | -0.246 | -0.012 |
| 21       | 114.43                  | -0.662                | -0.001   | 0.047  | -1.889                | -0.005   | 0.133  | 0.006  |
| 22       | 122.31                  | 0.377                 | -0.000   | -0.025 | 4.847                 | -0.028   | -0.320 | -0.020 |
| 23       | 123.08                  | -0.353                | -0.000   | 0.023  | 2.275                 | -0.006   | -0.149 | -0.012 |
| 24       | 124.37                  | -0.516                | -0.000   | 0.033  | 0.127                 | -0.000   | -0.008 | -0.003 |
| 25       | 135.02                  | 4.423                 | -0.021   | -0.264 | 7.734                 | -0.066   | -0.462 | -0.015 |
| 26       | 144.39                  | 0.038                 | -0.000   | -0.002 | 2.119                 | -0.005   | -0.118 | -0.009 |
| 27       | 144.89                  | 0.143                 | -0.000   | -0.008 | -9.088                | -0.084   | 0.506  | 0.042  |
| 28       | 158.02                  | -1.327                | -0.002   | 0.068  | -2.873                | -0.008   | 0.147  | 0.007  |
| 29       | 159.46                  | -0.153                | -0.000   | 0.008  | 5.085                 | -0.024   | -0.257 | -0.024 |
| 30       | 161.93                  | 3.128                 | -0.009   | -0.156 | 3.426                 | -0.011   | -0.171 | -0.001 |
| 31       | 173.08                  | -0.441                | -0.000   | 0.021  | 1.069                 | -0.001   | -0.050 | -0.007 |
| 32       | 173.40                  | -0.534                | -0.000   | 0.025  | -1.603                | -0.002   | 0.075  | 0.005  |
| 33       | 174.49                  | -3.783                | -0.012   | 0.175  | -2.068                | -0.004   | 0.096  | -0.008 |
| 34       | 190.80                  | -0.327                | -0.000   | 0.014  | -3.263                | -0.008   | 0.138  | 0.013  |
| 35       | 191.18                  | 0.130                 | -0.000   | -0.005 | -3.720                | -0.011   | 0.157  | 0.017  |

Continued on next page

— Continued from previous page

| $\alpha$ | Freq. /cm <sup>-1</sup> | $\kappa_\alpha$ / meV | dE / meV | dQ     | $\kappa_\alpha$ / meV | dE / meV | dQ     | $\xi$  |
|----------|-------------------------|-----------------------|----------|--------|-----------------------|----------|--------|--------|
| 36       | 236.90                  | 0.252                 | -0.000   | -0.009 | -2.528                | -0.004   | 0.086  | 0.013  |
| 37       | 237.25                  | 1.284                 | -0.001   | -0.044 | -0.061                | -0.000   | 0.002  | 0.006  |
| 38       | 238.02                  | 3.647                 | -0.008   | -0.124 | 2.590                 | -0.004   | -0.088 | 0.005  |
| 39       | 239.23                  | 2.332                 | -0.003   | -0.079 | 3.881                 | -0.009   | -0.131 | -0.007 |
| 40       | 246.13                  | 0.023                 | -0.000   | -0.001 | 1.881                 | -0.002   | -0.062 | -0.008 |
| 41       | 246.29                  | 0.551                 | -0.000   | -0.018 | -6.069                | -0.022   | 0.199  | 0.030  |
| 42       | 257.54                  | -2.433                | -0.003   | 0.076  | -6.955                | -0.028   | 0.218  | 0.020  |
| 43       | 282.13                  | 0.033                 | -0.000   | -0.001 | -2.082                | -0.002   | 0.060  | 0.010  |
| 44       | 282.85                  | 0.370                 | -0.000   | -0.011 | -10.666               | -0.060   | 0.304  | 0.050  |
| 45       | 296.86                  | 7.875                 | -0.031   | -0.214 | 12.547                | -0.079   | -0.341 | -0.021 |
| 46       | 302.95                  | 11.203                | -0.061   | -0.298 | 14.405                | -0.102   | -0.384 | -0.014 |
| 47       | 314.98                  | 0.092                 | -0.000   | -0.002 | 0.615                 | -0.000   | -0.016 | -0.002 |
| 48       | 315.29                  | 0.389                 | -0.000   | -0.010 | -1.438                | -0.001   | 0.037  | 0.008  |
| 49       | 316.37                  | -2.780                | -0.004   | 0.071  | -1.920                | -0.002   | 0.049  | -0.004 |
| 50       | 330.08                  | 0.394                 | -0.000   | -0.010 | 14.847                | -0.099   | -0.363 | -0.065 |
| 51       | 330.19                  | 0.113                 | -0.000   | -0.003 | 10.410                | -0.049   | -0.254 | -0.047 |
| 52       | 355.94                  | 6.122                 | -0.016   | -0.139 | 15.462                | -0.100   | -0.350 | -0.042 |
| 53       | 376.88                  | -0.316                | -0.000   | 0.007  | 8.167                 | -0.026   | -0.175 | -0.038 |
| 54       | 377.11                  | -0.004                | -0.000   | 0.000  | -5.144                | -0.010   | 0.110  | 0.023  |
| 55       | 387.54                  | 5.884                 | -0.013   | -0.122 | 5.144                 | -0.010   | -0.107 | 0.003  |
| 56       | 388.06                  | 1.449                 | -0.001   | -0.030 | 12.838                | -0.063   | -0.267 | -0.051 |
| 57       | 388.36                  | -0.816                | -0.000   | 0.017  | 0.039                 | -0.000   | -0.001 | -0.004 |
| 58       | 399.76                  | -1.637                | -0.001   | 0.033  | 0.037                 | -0.000   | -0.001 | -0.008 |
| 59       | 400.25                  | 4.822                 | -0.009   | -0.097 | 16.557                | -0.102   | -0.334 | -0.053 |
| 60       | 401.14                  | 9.778                 | -0.035   | -0.197 | 4.122                 | -0.006   | -0.083 | 0.026  |
| 61       | 421.25                  | 4.364                 | -0.007   | -0.084 | 4.848                 | -0.008   | -0.093 | -0.002 |
| 62       | 423.53                  | -0.233                | -0.000   | 0.004  | 2.590                 | -0.002   | -0.049 | -0.013 |
| 63       | 423.75                  | -0.393                | -0.000   | 0.007  | 0.682                 | -0.000   | -0.013 | -0.005 |
| 64       | 432.77                  | 2.477                 | -0.002   | -0.046 | -1.162                | -0.000   | 0.022  | 0.016  |
| 65       | 433.39                  | -0.798                | -0.000   | 0.015  | -4.514                | -0.007   | 0.084  | 0.017  |
| 66       | 434.07                  | -0.002                | -0.000   | 0.000  | -0.271                | -0.000   | 0.005  | 0.001  |
| 67       | 438.60                  | 7.157                 | -0.017   | -0.132 | 12.883                | -0.056   | -0.237 | -0.026 |
| 68       | 440.61                  | 1.593                 | -0.001   | -0.029 | -10.517               | -0.037   | 0.193  | 0.055  |
| 69       | 441.09                  | -0.469                | -0.000   | 0.009  | 11.087                | -0.041   | -0.203 | -0.052 |
| 70       | 457.15                  | -7.292                | -0.017   | 0.129  | -6.778                | -0.015   | 0.120  | -0.002 |
| 71       | 458.26                  | -2.403                | -0.002   | 0.042  | -5.173                | -0.009   | 0.091  | 0.013  |
| 72       | 458.74                  | -2.222                | -0.002   | 0.039  | -4.455                | -0.006   | 0.078  | 0.010  |
| 73       | 466.73                  | 10.753                | -0.037   | -0.186 | 15.052                | -0.072   | -0.260 | -0.019 |
| 74       | 470.22                  | -3.014                | -0.003   | 0.052  | 5.824                 | -0.011   | -0.100 | -0.040 |
| 75       | 471.57                  | 1.307                 | -0.001   | -0.022 | -2.223                | -0.002   | 0.038  | 0.016  |
| 76       | 524.06                  | -0.155                | -0.000   | 0.002  | 0.722                 | -0.000   | -0.011 | -0.004 |
| 77       | 524.45                  | -0.032                | -0.000   | 0.000  | 5.704                 | -0.009   | -0.088 | -0.026 |
| 78       | 527.57                  | 1.248                 | -0.000   | -0.019 | -6.958                | -0.014   | 0.106  | 0.037  |
| 79       | 549.92                  | 0.424                 | -0.000   | -0.006 | -0.953                | -0.000   | 0.014  | 0.006  |

Continued on next page

— Continued from previous page

| $\alpha$ | Freq. /cm <sup>-1</sup> | $\kappa_\alpha$ / meV | dE / meV | dQ     | $\kappa_\alpha$ / meV | dE / meV | dQ     | $\xi$  |
|----------|-------------------------|-----------------------|----------|--------|-----------------------|----------|--------|--------|
| 80       | 550.27                  | -0.125                | -0.000   | 0.002  | -1.093                | -0.000   | 0.016  | 0.004  |
| 81       | 552.21                  | -0.346                | -0.000   | 0.005  | -1.643                | -0.001   | 0.024  | 0.006  |
| 82       | 561.63                  | 0.035                 | -0.000   | -0.001 | -0.579                | -0.000   | 0.008  | 0.003  |
| 83       | 561.88                  | 0.199                 | -0.000   | -0.003 | 2.362                 | -0.001   | -0.034 | -0.010 |
| 84       | 566.34                  | 4.355                 | -0.005   | -0.062 | 4.705                 | -0.006   | -0.067 | -0.002 |
| 85       | 568.88                  | 0.151                 | -0.000   | -0.002 | -5.566                | -0.008   | 0.079  | 0.026  |
| 86       | 569.06                  | 0.148                 | -0.000   | -0.002 | 8.892                 | -0.021   | -0.126 | -0.040 |
| 87       | 579.70                  | 3.811                 | -0.004   | -0.053 | 3.026                 | -0.002   | -0.042 | 0.004  |
| 88       | 582.59                  | 6.849                 | -0.012   | -0.095 | 6.529                 | -0.011   | -0.090 | 0.001  |
| 89       | 583.44                  | 0.663                 | -0.000   | -0.009 | 3.411                 | -0.003   | -0.047 | -0.012 |
| 90       | 583.55                  | -0.202                | -0.000   | 0.003  | -3.438                | -0.003   | 0.048  | 0.015  |
| 91       | 587.01                  | 0.096                 | -0.000   | -0.001 | -12.895               | -0.042   | 0.177  | 0.059  |
| 92       | 587.21                  | 0.592                 | -0.000   | -0.008 | 0.601                 | -0.000   | -0.008 | -0.000 |
| 93       | 602.16                  | -0.375                | -0.000   | 0.005  | -4.500                | -0.005   | 0.060  | 0.019  |
| 94       | 602.50                  | -0.132                | -0.000   | 0.002  | 6.697                 | -0.011   | -0.090 | -0.031 |
| 95       | 605.02                  | 4.054                 | -0.004   | -0.054 | 4.786                 | -0.006   | -0.064 | -0.003 |
| 96       | 635.75                  | -1.169                | -0.000   | 0.015  | 0.032                 | -0.000   | -0.000 | -0.005 |
| 97       | 636.58                  | 0.754                 | -0.000   | -0.010 | 2.941                 | -0.002   | -0.037 | -0.010 |
| 98       | 637.27                  | -4.568                | -0.005   | 0.058  | -3.028                | -0.002   | 0.038  | -0.007 |
| 99       | 650.33                  | 4.518                 | -0.005   | -0.056 | 3.520                 | -0.003   | -0.044 | 0.005  |
| 100      | 664.36                  | 0.311                 | -0.000   | -0.004 | -2.059                | -0.001   | 0.025  | 0.011  |
| 101      | 664.52                  | -0.237                | -0.000   | 0.003  | 0.867                 | -0.000   | -0.011 | -0.005 |
| 102      | 676.77                  | 13.346                | -0.039   | -0.159 | 16.019                | -0.056   | -0.191 | -0.012 |
| 103      | 687.01                  | 0.383                 | -0.000   | -0.004 | 15.825                | -0.054   | -0.186 | -0.070 |
| 104      | 687.30                  | -0.284                | -0.000   | 0.003  | -8.298                | -0.015   | 0.097  | 0.036  |
| 105      | 694.66                  | -0.090                | -0.000   | 0.001  | -0.008                | -0.000   | 0.000  | -0.000 |
| 106      | 694.99                  | 0.154                 | -0.000   | -0.002 | -4.028                | -0.003   | 0.047  | 0.019  |
| 107      | 716.02                  | 9.435                 | -0.018   | -0.106 | 0.699                 | -0.000   | -0.008 | 0.039  |
| 108      | 722.39                  | 0.130                 | -0.000   | -0.001 | 8.746                 | -0.016   | -0.098 | -0.039 |
| 109      | 722.64                  | 0.309                 | -0.000   | -0.003 | 3.551                 | -0.003   | -0.040 | -0.015 |
| 110      | 729.09                  | 4.532                 | -0.004   | -0.050 | 9.797                 | -0.020   | -0.108 | -0.024 |
| 111      | 735.06                  | -1.776                | -0.001   | 0.019  | -8.440                | -0.014   | 0.093  | 0.030  |
| 112      | 735.40                  | -0.510                | -0.000   | 0.006  | -8.738                | -0.015   | 0.096  | 0.037  |
| 113      | 735.55                  | -0.283                | -0.000   | 0.003  | -0.033                | -0.000   | 0.000  | -0.001 |
| 114      | 746.86                  | -2.576                | -0.001   | 0.028  | -0.947                | -0.000   | 0.010  | -0.007 |
| 115      | 747.53                  | -4.440                | -0.004   | 0.048  | 1.298                 | -0.000   | -0.014 | -0.026 |
| 116      | 748.16                  | -0.136                | -0.000   | 0.001  | -3.386                | -0.002   | 0.037  | 0.015  |
| 117      | 748.59                  | 0.713                 | -0.000   | -0.008 | 0.868                 | -0.000   | -0.009 | -0.001 |
| 118      | 751.20                  | -0.757                | -0.000   | 0.008  | -6.839                | -0.009   | 0.073  | 0.027  |
| 119      | 751.48                  | 0.808                 | -0.000   | -0.009 | 3.360                 | -0.002   | -0.036 | -0.012 |
| 120      | 763.59                  | 1.039                 | -0.000   | -0.011 | 3.439                 | -0.002   | -0.036 | -0.011 |
| 121      | 764.85                  | -1.456                | -0.000   | 0.015  | 2.608                 | -0.001   | -0.028 | -0.018 |
| 122      | 766.37                  | 0.791                 | -0.000   | -0.008 | -2.008                | -0.001   | 0.021  | 0.013  |
| 123      | 768.16                  | 0.319                 | -0.000   | -0.003 | 3.448                 | -0.002   | -0.036 | -0.014 |

Continued on next page



— Continued from previous page

| $\alpha$ | Freq. /cm <sup>-1</sup> | $\kappa_\alpha$ / meV | dE / meV | dQ     | $\kappa_\alpha$ / meV | dE / meV | dQ     | $\xi$  |
|----------|-------------------------|-----------------------|----------|--------|-----------------------|----------|--------|--------|
| 124      | 768.93                  | -0.449                | -0.000   | 0.005  | 0.800                 | -0.000   | -0.008 | -0.006 |
| 125      | 773.12                  | 1.082                 | -0.000   | -0.011 | -0.504                | -0.000   | 0.005  | 0.007  |
| 126      | 779.85                  | 0.217                 | -0.000   | -0.002 | 0.138                 | -0.000   | -0.001 | 0.000  |
| 127      | 780.27                  | -0.067                | -0.000   | 0.001  | -0.341                | -0.000   | 0.004  | 0.001  |
| 128      | 780.68                  | -0.295                | -0.000   | 0.003  | -0.701                | -0.000   | 0.007  | 0.002  |
| 129      | 791.90                  | -15.870               | -0.047   | 0.162  | -18.861               | -0.067   | 0.192  | 0.014  |
| 130      | 817.63                  | -0.250                | -0.000   | 0.002  | -14.121               | -0.036   | 0.139  | 0.063  |
| 131      | 818.00                  | 0.041                 | -0.000   | -0.000 | 6.488                 | -0.008   | -0.064 | -0.029 |
| 132      | 822.08                  | 4.411                 | -0.004   | -0.043 | 9.429                 | -0.016   | -0.093 | -0.023 |
| 133      | 841.82                  | 1.857                 | -0.001   | -0.018 | -3.309                | -0.002   | 0.032  | 0.023  |
| 134      | 846.29                  | 0.051                 | -0.000   | -0.000 | 1.985                 | -0.001   | -0.019 | -0.009 |
| 135      | 846.72                  | 0.475                 | -0.000   | -0.005 | -6.535                | -0.007   | 0.062  | 0.032  |
| 136      | 864.66                  | 0.080                 | -0.000   | -0.001 | -0.802                | -0.000   | 0.007  | 0.004  |
| 137      | 864.77                  | 0.051                 | -0.000   | -0.000 | -16.179               | -0.045   | 0.151  | 0.073  |
| 138      | 870.78                  | -1.046                | -0.000   | 0.010  | 0.285                 | -0.000   | -0.003 | -0.006 |
| 139      | 873.30                  | -0.662                | -0.000   | 0.006  | -4.729                | -0.004   | 0.044  | 0.018  |
| 140      | 873.69                  | 0.609                 | -0.000   | -0.006 | -2.295                | -0.001   | 0.021  | 0.013  |
| 141      | 883.61                  | -2.021                | -0.001   | 0.018  | -4.852                | -0.004   | 0.044  | 0.013  |
| 142      | 884.81                  | 3.585                 | -0.002   | -0.033 | 10.191                | -0.017   | -0.093 | -0.030 |
| 143      | 885.54                  | 2.855                 | -0.001   | -0.026 | 8.598                 | -0.012   | -0.078 | -0.026 |
| 144      | 886.51                  | -1.550                | -0.000   | 0.014  | -4.662                | -0.004   | 0.042  | 0.014  |
| 145      | 903.66                  | 0.046                 | -0.000   | -0.000 | 6.454                 | -0.007   | -0.058 | -0.029 |
| 146      | 907.01                  | 0.503                 | -0.000   | -0.004 | -1.284                | -0.000   | 0.011  | 0.008  |
| 147      | 922.64                  | -1.981                | -0.001   | 0.017  | -13.079               | -0.027   | 0.114  | 0.050  |
| 148      | 944.10                  | -1.278                | -0.000   | 0.011  | -6.672                | -0.007   | 0.057  | 0.024  |
| 149      | 947.35                  | -1.387                | -0.000   | 0.012  | -1.691                | -0.000   | 0.014  | 0.001  |
| 150      | 947.67                  | 2.192                 | -0.001   | -0.019 | 0.452                 | -0.000   | -0.004 | 0.008  |
| 151      | 955.74                  | -0.155                | -0.000   | 0.001  | 0.040                 | -0.000   | -0.000 | -0.001 |
| 152      | 956.71                  | -0.335                | -0.000   | 0.003  | -0.164                | -0.000   | 0.001  | -0.001 |
| 153      | 957.63                  | 0.218                 | -0.000   | -0.002 | 0.284                 | -0.000   | -0.002 | -0.000 |
| 154      | 966.18                  | 0.332                 | -0.000   | -0.003 | 12.567                | -0.024   | -0.105 | -0.055 |
| 155      | 966.88                  | 0.753                 | -0.000   | -0.006 | 9.423                 | -0.014   | -0.079 | -0.039 |
| 156      | 969.85                  | -2.315                | -0.001   | 0.019  | 0.741                 | -0.000   | -0.006 | -0.014 |
| 157      | 973.07                  | 0.094                 | -0.000   | -0.001 | 13.594                | -0.028   | -0.113 | -0.061 |
| 158      | 973.87                  | 0.705                 | -0.000   | -0.006 | 5.873                 | -0.005   | -0.049 | -0.023 |
| 159      | 986.34                  | -2.025                | -0.001   | 0.017  | -3.734                | -0.002   | 0.031  | 0.008  |
| 160      | 987.22                  | -3.796                | -0.002   | 0.031  | -4.076                | -0.002   | 0.033  | 0.001  |
| 161      | 989.08                  | -4.308                | -0.003   | 0.035  | -6.597                | -0.007   | 0.054  | 0.010  |
| 162      | 991.75                  | 11.720                | -0.021   | -0.095 | 21.734                | -0.071   | -0.177 | -0.045 |
| 163      | 1000.97                 | 0.008                 | -0.000   | -0.000 | -0.067                | -0.000   | 0.001  | 0.000  |
| 164      | 1001.29                 | -0.015                | -0.000   | 0.000  | 0.154                 | -0.000   | -0.001 | -0.001 |
| 165      | 1001.43                 | 0.093                 | -0.000   | -0.001 | -0.066                | -0.000   | 0.001  | 0.001  |
| 166      | 1021.10                 | -6.415                | -0.006   | 0.051  | -12.843               | -0.024   | 0.101  | 0.029  |
| 167      | 1041.47                 | 0.214                 | -0.000   | -0.002 | -9.911                | -0.014   | 0.077  | 0.046  |

Continued on next page



— Continued from previous page

| $\alpha$ | Freq. /cm <sup>-1</sup> | $\kappa_{\alpha}$ / meV | dE / meV | dQ     | $\kappa_{\alpha}$ / meV | dE / meV | dQ     | $\xi$  |
|----------|-------------------------|-------------------------|----------|--------|-------------------------|----------|--------|--------|
| 168      | 1041.70                 | 0.784                   | -0.000   | -0.006 | 2.522                   | -0.001   | -0.020 | -0.008 |
| 169      | 1045.35                 | -7.227                  | -0.007   | 0.056  | 5.916                   | -0.005   | -0.046 | -0.059 |
| 170      | 1065.08                 | 1.804                   | -0.000   | -0.014 | 0.101                   | -0.000   | -0.001 | 0.008  |
| 171      | 1065.36                 | 1.925                   | -0.001   | -0.015 | -4.930                  | -0.003   | 0.037  | 0.031  |
| 172      | 1066.31                 | -2.716                  | -0.001   | 0.021  | 1.673                   | -0.000   | -0.013 | -0.020 |
| 173      | 1069.59                 | -2.899                  | -0.001   | 0.022  | -8.828                  | -0.011   | 0.067  | 0.027  |
| 174      | 1070.23                 | -0.581                  | -0.000   | 0.004  | -4.697                  | -0.003   | 0.035  | 0.019  |
| 175      | 1073.13                 | -13.662                 | -0.026   | 0.103  | -11.185                 | -0.017   | 0.084  | -0.011 |
| 176      | 1073.45                 | -2.687                  | -0.001   | 0.020  | -6.815                  | -0.006   | 0.051  | 0.019  |
| 177      | 1074.18                 | -0.794                  | -0.000   | 0.006  | 3.043                   | -0.001   | -0.023 | -0.017 |
| 178      | 1077.59                 | -11.260                 | -0.017   | 0.084  | -9.513                  | -0.012   | 0.071  | -0.008 |
| 179      | 1105.88                 | 0.703                   | -0.000   | -0.005 | 8.703                   | -0.010   | -0.063 | -0.036 |
| 180      | 1106.40                 | 0.026                   | -0.000   | -0.000 | 20.043                  | -0.054   | -0.146 | -0.090 |
| 181      | 1117.87                 | -4.282                  | -0.002   | 0.031  | -0.106                  | -0.000   | 0.001  | -0.019 |
| 182      | 1118.34                 | 4.468                   | -0.003   | -0.032 | 2.186                   | -0.001   | -0.016 | 0.010  |
| 183      | 1118.54                 | -4.288                  | -0.002   | 0.031  | -0.999                  | -0.000   | 0.007  | -0.015 |
| 184      | 1152.97                 | 2.519                   | -0.001   | -0.018 | 0.493                   | -0.000   | -0.003 | 0.009  |
| 185      | 1153.11                 | -2.305                  | -0.001   | 0.016  | -7.432                  | -0.007   | 0.052  | 0.023  |
| 186      | 1153.95                 | -12.040                 | -0.019   | 0.084  | -15.573                 | -0.031   | 0.109  | 0.016  |
| 187      | 1154.44                 | 17.331                  | -0.039   | -0.121 | 19.260                  | -0.048   | -0.135 | -0.009 |
| 188      | 1159.31                 | -0.185                  | -0.000   | 0.001  | -7.651                  | -0.007   | 0.053  | 0.034  |
| 189      | 1160.58                 | 0.985                   | -0.000   | -0.007 | -5.441                  | -0.004   | 0.038  | 0.029  |
| 190      | 1170.62                 | -2.173                  | -0.001   | 0.015  | 8.065                   | -0.008   | -0.056 | -0.046 |
| 191      | 1172.52                 | -3.480                  | -0.002   | 0.024  | -1.510                  | -0.000   | 0.010  | -0.009 |
| 192      | 1172.95                 | -4.671                  | -0.003   | 0.032  | 1.616                   | -0.000   | -0.011 | -0.028 |
| 193      | 1182.93                 | 5.714                   | -0.004   | -0.039 | -1.383                  | -0.000   | 0.009  | 0.032  |
| 194      | 1183.19                 | 10.876                  | -0.015   | -0.074 | 3.262                   | -0.001   | -0.022 | 0.034  |
| 195      | 1183.97                 | -11.740                 | -0.017   | 0.080  | -3.216                  | -0.001   | 0.022  | -0.039 |
| 196      | 1190.59                 | -0.590                  | -0.000   | 0.004  | -8.297                  | -0.009   | 0.056  | 0.035  |
| 197      | 1191.65                 | -1.607                  | -0.000   | 0.011  | 13.849                  | -0.024   | -0.094 | -0.070 |
| 198      | 1193.71                 | -1.472                  | -0.000   | 0.010  | -12.900                 | -0.021   | 0.087  | 0.052  |
| 199      | 1196.27                 | 0.794                   | -0.000   | -0.005 | 3.974                   | -0.002   | -0.027 | -0.014 |
| 200      | 1197.77                 | -1.128                  | -0.000   | 0.008  | 1.148                   | -0.000   | -0.008 | -0.010 |
| 201      | 1197.84                 | -0.764                  | -0.000   | 0.005  | -0.513                  | -0.000   | 0.003  | -0.001 |
| 202      | 1226.69                 | -16.284                 | -0.032   | 0.107  | -25.473                 | -0.078   | 0.167  | 0.042  |
| 203      | 1232.76                 | 1.208                   | -0.000   | -0.008 | -8.092                  | -0.008   | 0.053  | 0.042  |
| 204      | 1233.13                 | -0.333                  | -0.000   | 0.002  | 11.866                  | -0.017   | -0.078 | -0.055 |
| 205      | 1263.96                 | 5.735                   | -0.004   | -0.037 | 20.916                  | -0.051   | -0.133 | -0.069 |
| 206      | 1264.11                 | -5.418                  | -0.003   | 0.035  | -1.648                  | -0.000   | 0.011  | -0.017 |
| 207      | 1264.50                 | -9.460                  | -0.010   | 0.060  | -21.469                 | -0.054   | 0.137  | 0.054  |
| 208      | 1273.51                 | -56.370                 | -0.370   | 0.357  | -60.328                 | -0.424   | 0.382  | 0.018  |
| 209      | 1278.05                 | 5.417                   | -0.003   | -0.034 | 6.166                   | -0.004   | -0.039 | -0.003 |
| 210      | 1279.72                 | -2.435                  | -0.001   | 0.015  | -35.041                 | -0.142   | 0.221  | 0.147  |
| 211      | 1298.93                 | -5.015                  | -0.003   | 0.031  | -0.587                  | -0.000   | 0.004  | -0.020 |

Continued on next page

| — Continued from previous page |                         |                       |          |        |                       |          |        |        |
|--------------------------------|-------------------------|-----------------------|----------|--------|-----------------------|----------|--------|--------|
| $\alpha$                       | Freq. /cm <sup>-1</sup> | $\kappa_\alpha$ / meV | dE / meV | dQ     | $\kappa_\alpha$ / meV | dE / meV | dQ     | $\xi$  |
| 212                            | 1299.78                 | 2.574                 | -0.001   | -0.016 | -16.653               | -0.032   | 0.103  | 0.087  |
| 213                            | 1303.02                 | 29.581                | -0.100   | -0.183 | 34.367                | -0.134   | -0.213 | -0.022 |
| 214                            | 1320.43                 | 0.661                 | -0.000   | -0.004 | 0.679                 | -0.000   | -0.004 | -0.000 |
| 215                            | 1321.18                 | -1.273                | -0.000   | 0.008  | -5.223                | -0.003   | 0.032  | 0.018  |
| 216                            | 1329.62                 | 40.242                | -0.181   | -0.244 | 32.450                | -0.117   | -0.197 | 0.035  |
| 217                            | 1340.08                 | -6.924                | -0.005   | 0.042  | -11.039               | -0.013   | 0.066  | 0.019  |
| 218                            | 1340.90                 | 3.418                 | -0.001   | -0.021 | 19.216                | -0.041   | -0.116 | -0.071 |
| 219                            | 1345.20                 | 38.972                | -0.167   | -0.234 | 37.368                | -0.154   | -0.224 | 0.007  |
| 220                            | 1345.97                 | 4.568                 | -0.002   | -0.027 | 4.705                 | -0.002   | -0.028 | -0.001 |
| 221                            | 1347.47                 | -2.742                | -0.001   | 0.016  | 1.066                 | -0.000   | -0.006 | -0.017 |
| 222                            | 1348.19                 | 1.324                 | -0.000   | -0.008 | 3.020                 | -0.001   | -0.018 | -0.008 |
| 223                            | 1363.49                 | -38.480               | -0.161   | 0.228  | -48.842               | -0.259   | 0.289  | 0.047  |
| 224                            | 1367.79                 | -5.309                | -0.003   | 0.031  | -18.381               | -0.037   | 0.108  | 0.059  |
| 225                            | 1368.57                 | -1.840                | -0.000   | 0.011  | -9.930                | -0.011   | 0.059  | 0.037  |
| 226                            | 1374.91                 | -14.725               | -0.023   | 0.086  | -16.943               | -0.031   | 0.099  | 0.010  |
| 227                            | 1377.40                 | -4.022                | -0.002   | 0.024  | -24.958               | -0.067   | 0.146  | 0.095  |
| 228                            | 1377.90                 | -0.485                | -0.000   | 0.003  | -23.369               | -0.059   | 0.137  | 0.103  |
| 229                            | 1404.14                 | 8.226                 | -0.007   | -0.047 | 13.672                | -0.020   | -0.079 | -0.025 |
| 230                            | 1404.52                 | 10.981                | -0.013   | -0.063 | 6.275                 | -0.004   | -0.036 | 0.021  |
| 231                            | 1405.17                 | -8.263                | -0.007   | 0.047  | 6.505                 | -0.004   | -0.037 | -0.067 |
| 232                            | 1405.66                 | 8.507                 | -0.008   | -0.049 | 16.852                | -0.030   | -0.097 | -0.038 |
| 233                            | 1419.71                 | 0.024                 | -0.000   | -0.000 | 2.937                 | -0.001   | -0.017 | -0.013 |
| 234                            | 1420.16                 | -0.581                | -0.000   | 0.003  | 15.004                | -0.023   | -0.085 | -0.070 |
| 235                            | 1441.10                 | -12.158               | -0.015   | 0.068  | -14.665               | -0.022   | 0.082  | 0.011  |
| 236                            | 1448.95                 | 0.865                 | -0.000   | -0.005 | -37.675               | -0.145   | 0.210  | 0.174  |
| 237                            | 1449.72                 | -0.507                | -0.000   | 0.003  | 8.922                 | -0.008   | -0.050 | -0.043 |
| 238                            | 1464.10                 | 0.852                 | -0.000   | -0.005 | -4.946                | -0.002   | 0.027  | 0.026  |
| 239                            | 1473.54                 | 6.710                 | -0.005   | -0.037 | 12.961                | -0.017   | -0.071 | -0.028 |
| 240                            | 1476.37                 | -1.739                | -0.000   | 0.009  | 9.174                 | -0.008   | -0.050 | -0.049 |
| 241                            | 1477.19                 | -0.149                | -0.000   | 0.001  | 3.848                 | -0.001   | -0.021 | -0.018 |
| 242                            | 1493.29                 | -6.181                | -0.004   | 0.033  | -2.351                | -0.001   | 0.013  | -0.017 |
| 243                            | 1494.02                 | 5.273                 | -0.003   | -0.028 | 0.611                 | -0.000   | -0.003 | 0.021  |
| 244                            | 1495.20                 | 5.288                 | -0.003   | -0.029 | -1.347                | -0.000   | 0.007  | 0.030  |
| 245                            | 1511.57                 | 4.462                 | -0.002   | -0.024 | 14.710                | -0.021   | -0.078 | -0.046 |
| 246                            | 1516.07                 | 0.189                 | -0.000   | -0.001 | -0.331                | -0.000   | 0.002  | 0.002  |
| 247                            | 1516.86                 | 0.175                 | -0.000   | -0.001 | -12.473               | -0.015   | 0.066  | 0.057  |
| 248                            | 1528.07                 | 20.724                | -0.042   | -0.109 | 33.374                | -0.108   | -0.176 | -0.057 |
| 249                            | 1529.43                 | -1.175                | -0.000   | 0.006  | -8.744                | -0.007   | 0.046  | 0.034  |
| 250                            | 1529.79                 | -10.476               | -0.011   | 0.055  | -1.589                | -0.000   | 0.008  | -0.040 |
| 251                            | 1531.63                 | -16.344               | -0.026   | 0.086  | -23.089               | -0.052   | 0.122  | 0.030  |
| 252                            | 1532.81                 | 19.138                | -0.035   | -0.101 | 3.173                 | -0.001   | -0.017 | 0.072  |
| 253                            | 1533.15                 | -7.141                | -0.005   | 0.038  | -6.688                | -0.004   | 0.035  | -0.002 |
| 254                            | 1541.53                 | 6.766                 | -0.004   | -0.035 | 8.740                 | -0.007   | -0.046 | -0.009 |
| 255                            | 1541.85                 | -6.903                | -0.005   | 0.036  | -5.653                | -0.003   | 0.030  | -0.006 |

Continued on next page

— Continued from previous page

| $\alpha$ | Freq. /cm <sup>-1</sup> | $\kappa_{\alpha}$ / meV | dE / meV | dQ     | $\kappa_{\alpha}$ / meV | dE / meV | dQ     | $\xi$  |
|----------|-------------------------|-------------------------|----------|--------|-------------------------|----------|--------|--------|
| 256      | 1543.04                 | 8.188                   | -0.006   | -0.043 | 6.729                   | -0.004   | -0.035 | 0.007  |
| 257      | 1643.36                 | 0.416                   | -0.000   | -0.002 | -4.055                  | -0.001   | 0.020  | 0.020  |
| 258      | 1643.91                 | 0.630                   | -0.000   | -0.003 | -133.887                | -1.616   | 0.657  | 0.608  |
| 259      | 1651.45                 | -10.183                 | -0.009   | 0.050  | -19.238                 | -0.033   | 0.094  | 0.041  |
| 260      | 1652.33                 | -7.883                  | -0.006   | 0.038  | 2.831                   | -0.001   | -0.014 | -0.048 |
| 261      | 1653.37                 | -21.320                 | -0.041   | 0.104  | -13.886                 | -0.017   | 0.068  | -0.034 |
| 262      | 1655.44                 | 26.140                  | -0.061   | -0.127 | 36.697                  | -0.121   | -0.179 | -0.048 |
| 263      | 1656.79                 | -6.671                  | -0.004   | 0.032  | 61.137                  | -0.334   | -0.298 | -0.306 |
| 264      | 1657.35                 | -4.116                  | -0.002   | 0.020  | -4.680                  | -0.002   | 0.023  | 0.003  |
| 265      | 1666.68                 | 8.519                   | -0.006   | -0.041 | 21.636                  | -0.042   | -0.105 | -0.059 |
| 266      | 1667.73                 | -5.408                  | -0.003   | 0.026  | 18.437                  | -0.030   | -0.089 | -0.108 |
| 267      | 1668.39                 | -3.910                  | -0.001   | 0.019  | 9.209                   | -0.008   | -0.045 | -0.059 |
| 268      | 1677.73                 | -9.355                  | -0.008   | 0.045  | -22.301                 | -0.044   | 0.107  | 0.058  |
| 269      | 1678.79                 | 10.482                  | -0.010   | -0.050 | 13.089                  | -0.015   | -0.063 | -0.012 |
| 270      | 1679.09                 | -6.218                  | -0.003   | 0.030  | 10.204                  | -0.009   | -0.049 | -0.074 |
| 271      | 1679.61                 | -21.460                 | -0.041   | 0.103  | -16.454                 | -0.024   | 0.079  | -0.023 |
| 272      | 1680.06                 | 1.956                   | -0.000   | -0.009 | -2.821                  | -0.001   | 0.014  | 0.022  |
| 273      | 1680.87                 | 23.545                  | -0.049   | -0.113 | 22.237                  | -0.044   | -0.107 | 0.006  |
| 274      | 1687.64                 | 33.130                  | -0.096   | -0.158 | 67.937                  | -0.405   | -0.325 | -0.157 |
| 275      | 1690.07                 | -5.708                  | -0.003   | 0.027  | 89.902                  | -0.709   | -0.429 | -0.432 |
| 276      | 1690.70                 | -3.776                  | -0.001   | 0.018  | -11.242                 | -0.011   | 0.054  | 0.034  |
| 277      | 3206.39                 | -0.954                  | -0.000   | 0.002  | 0.425                   | -0.000   | -0.001 | -0.006 |
| 278      | 3206.95                 | -0.961                  | -0.000   | 0.002  | -2.346                  | -0.000   | 0.006  | 0.006  |
| 279      | 3208.69                 | -1.028                  | -0.000   | 0.003  | 0.432                   | -0.000   | -0.001 | -0.007 |
| 280      | 3208.70                 | 0.167                   | -0.000   | -0.000 | -5.913                  | -0.002   | 0.015  | 0.027  |
| 281      | 3209.44                 | 0.034                   | -0.000   | -0.000 | -0.269                  | -0.000   | 0.001  | 0.001  |
| 282      | 3210.80                 | 0.180                   | -0.000   | -0.000 | -0.896                  | -0.000   | 0.002  | 0.005  |
| 283      | 3218.79                 | 0.148                   | -0.000   | -0.000 | -0.202                  | -0.000   | 0.001  | 0.002  |
| 284      | 3220.02                 | -0.155                  | -0.000   | 0.000  | -0.313                  | -0.000   | 0.001  | 0.001  |
| 285      | 3220.27                 | 0.163                   | -0.000   | -0.000 | 2.400                   | -0.000   | -0.006 | -0.010 |
| 286      | 3220.51                 | 0.529                   | -0.000   | -0.001 | 1.202                   | -0.000   | -0.003 | -0.003 |
| 287      | 3222.62                 | 0.565                   | -0.000   | -0.001 | -1.414                  | -0.000   | 0.004  | 0.009  |
| 288      | 3223.76                 | 0.682                   | -0.000   | -0.002 | 1.150                   | -0.000   | -0.003 | -0.002 |
| 289      | 3224.21                 | 0.417                   | -0.000   | -0.001 | -2.375                  | -0.000   | 0.006  | 0.013  |
| 290      | 3225.14                 | 0.142                   | -0.000   | -0.000 | -1.036                  | -0.000   | 0.003  | 0.005  |
| 291      | 3225.48                 | 0.347                   | -0.000   | -0.001 | 1.707                   | -0.000   | -0.004 | -0.006 |
| 292      | 3227.06                 | 0.176                   | -0.000   | -0.000 | 3.486                   | -0.001   | -0.009 | -0.015 |
| 293      | 3227.43                 | -0.085                  | -0.000   | 0.000  | 0.125                   | -0.000   | -0.000 | -0.001 |
| 294      | 3229.46                 | -0.156                  | -0.000   | 0.000  | -1.358                  | -0.000   | 0.003  | 0.005  |
| 295      | 3229.90                 | -0.014                  | -0.000   | 0.000  | -0.361                  | -0.000   | 0.001  | 0.002  |
| 296      | 3230.22                 | 0.035                   | -0.000   | -0.000 | -10.169                 | -0.005   | 0.025  | 0.046  |
| 297      | 3232.20                 | -2.006                  | -0.000   | 0.005  | -5.782                  | -0.002   | 0.014  | 0.017  |
| 298      | 3232.93                 | 1.315                   | -0.000   | -0.003 | 3.779                   | -0.001   | -0.009 | -0.011 |
| 299      | 3233.32                 | 1.729                   | -0.000   | -0.004 | -1.531                  | -0.000   | 0.004  | 0.015  |

Continued on next page

— Continued from previous page

| $\alpha$ | Freq. /cm <sup>-1</sup> | $\kappa_{\alpha}$ / meV | dE / meV | dQ     | $\kappa_{\alpha}$ / meV | dE / meV | dQ     | $\xi$  |
|----------|-------------------------|-------------------------|----------|--------|-------------------------|----------|--------|--------|
| 300      | 3235.66                 | -1.531                  | -0.000   | 0.004  | -3.589                  | -0.001   | 0.009  | 0.009  |
| 301      | 3236.56                 | -0.084                  | -0.000   | 0.000  | -0.161                  | -0.000   | 0.000  | 0.000  |
| 302      | 3237.23                 | 0.279                   | -0.000   | -0.001 | -2.172                  | -0.000   | 0.005  | 0.011  |
| 303      | 3237.54                 | -1.263                  | -0.000   | 0.003  | -12.015                 | -0.007   | 0.030  | 0.049  |
| 304      | 3237.60                 | 0.306                   | -0.000   | -0.001 | 5.607                   | -0.001   | -0.014 | -0.024 |
| 305      | 3238.62                 | -0.939                  | -0.000   | 0.002  | -7.854                  | -0.003   | 0.020  | 0.031  |
| 306      | 3238.77                 | 1.567                   | -0.000   | -0.004 | 1.570                   | -0.000   | -0.004 | -0.000 |
| 307      | 3266.38                 | 1.860                   | -0.000   | -0.005 | 10.312                  | -0.005   | -0.025 | -0.038 |
| 308      | 3271.98                 | -2.267                  | -0.000   | 0.006  | -3.956                  | -0.001   | 0.010  | 0.008  |
| 309      | 3272.58                 | 2.883                   | -0.000   | -0.007 | 2.718                   | -0.000   | -0.007 | 0.001  |

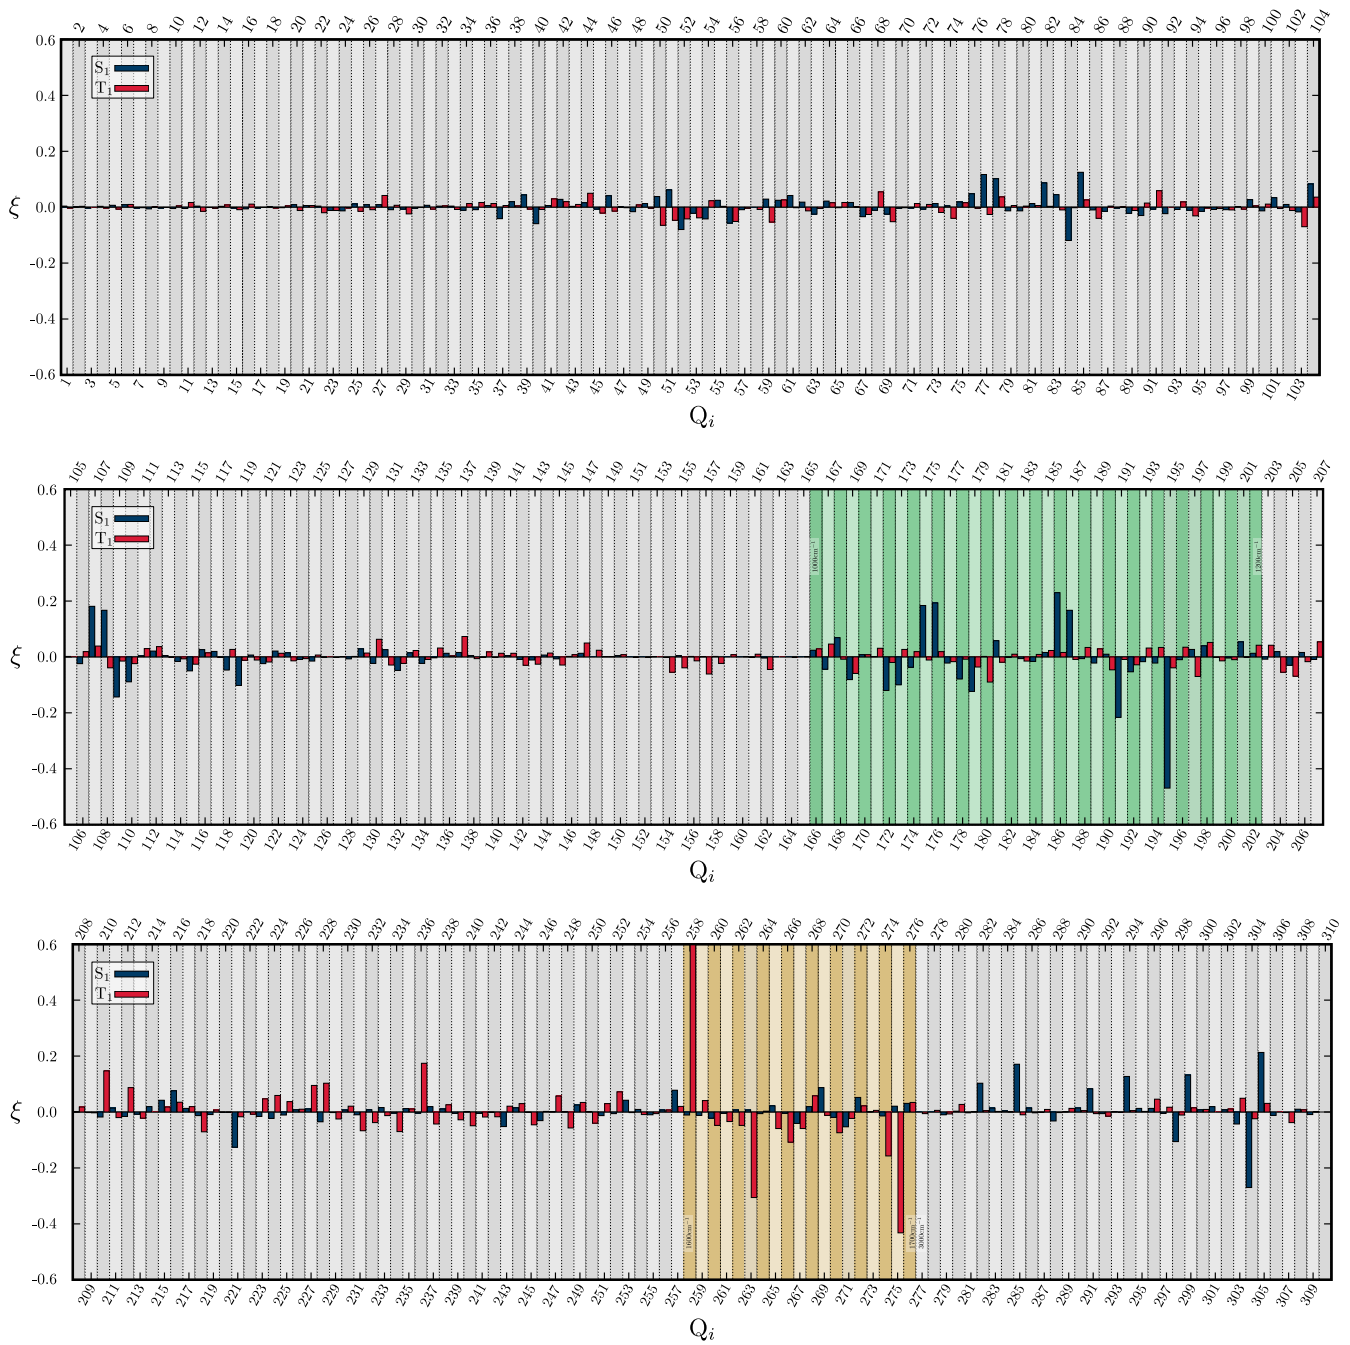

**Figure S4:** RSMA for all the normal modes of TAT-3DBTO<sub>2</sub> for  $S_1$  and  $T_1$  as a function of their index. The range of frequencies mentioned in the main text are emphasized in colours.

## S3 Maleimide

### S3-1 Geometry

**Table S17:** Cartesian coordinates different minima of Maleimide.

| GS |         |         |         | S1 |         |         |         | S2 |         |         |         |
|----|---------|---------|---------|----|---------|---------|---------|----|---------|---------|---------|
| At | x       | y       | z       | At | x       | y       | z       | At | x       | y       | z       |
| C  | 1.0895  | -1.9669 | -0.0163 | C  | 1.1089  | -1.9661 | -0.0175 | C  | 1.1163  | -1.9345 | -0.0166 |
| C  | -0.2581 | -1.9317 | 0.0190  | C  | -0.2773 | -1.9300 | 0.0198  | C  | -0.2831 | -1.8979 | 0.0202  |
| N  | 0.4744  | 0.2624  | 0.0335  | N  | 0.4734  | 0.2303  | 0.0323  | N  | 0.4742  | 0.2544  | 0.0336  |
| H  | 1.7572  | -2.8303 | -0.0466 | H  | 1.7681  | -2.8330 | -0.0447 | H  | 1.7646  | -2.8106 | -0.0466 |
| C  | 1.6147  | -0.5474 | -0.0086 | C  | 1.6093  | -0.6053 | -0.0120 | C  | 1.5932  | -0.5687 | -0.0082 |
| O  | -1.8355 | -0.0527 | 0.0883  | O  | -1.8158 | 0.0211  | 0.0901  | O  | -1.8707 | -0.0542 | 0.0892  |
| C  | -0.7073 | -0.4867 | 0.0527  | C  | -0.7049 | -0.5450 | 0.0506  | C  | -0.6869 | -0.5091 | 0.0517  |
| O  | 2.7643  | -0.1729 | -0.0324 | O  | 2.7486  | -0.0980 | -0.0325 | O  | 2.7994  | -0.1762 | -0.0336 |
| H  | -0.9706 | -2.7591 | 0.0249  | H  | -0.9813 | -2.7614 | 0.0253  | H  | -0.9769 | -2.7390 | 0.0253  |
| H  | 0.5012  | 1.2755  | 0.0482  | H  | 0.5002  | 1.2442  | 0.0506  | H  | 0.5010  | 1.2652  | 0.0478  |

**Table S18:** Cartesian coordinates different minima of Maleimide.

| S3 |         |         |         | S4 |         |         |         |
|----|---------|---------|---------|----|---------|---------|---------|
| At | x       | y       | z       | At | x       | y       | z       |
| C  | 1.1255  | -1.9283 | -0.0168 | C  | 1.1334  | -1.9550 | -0.0174 |
| C  | -0.2920 | -1.8913 | 0.0206  | C  | -0.3012 | -1.9175 | 0.0204  |
| N  | 0.4739  | 0.2431  | 0.0332  | N  | 0.4736  | 0.2321  | 0.0330  |
| H  | 1.7384  | -2.8306 | -0.0466 | H  | 1.7890  | -2.8265 | -0.0475 |
| C  | 1.7047  | -0.6229 | -0.0115 | C  | 1.6146  | -0.5770 | -0.0090 |
| O  | -1.8771 | 0.0143  | 0.0905  | O  | -1.8640 | -0.0271 | 0.0895  |
| C  | -0.8012 | -0.5574 | 0.0532  | C  | -0.7088 | -0.5163 | 0.0521  |
| O  | 2.8094  | -0.1082 | -0.0327 | O  | 2.7941  | -0.1489 | -0.0329 |
| H  | -0.9518 | -2.7603 | 0.0249  | H  | -1.0022 | -2.7536 | 0.0258  |
| H  | 0.5011  | 1.2710  | 0.0481  | H  | 0.5005  | 1.2466  | 0.0478  |

### S3-2 Electronic Structure

| State          | Nature                    | $\Delta E$ /eV |
|----------------|---------------------------|----------------|
| S <sub>0</sub> | GS                        | 0.00           |
| S <sub>1</sub> | $n_2 \rightarrow \pi^*$   | 4.07           |
| S <sub>2</sub> | $n_1 \rightarrow \pi^*$   | 4.84           |
| S <sub>3</sub> | $\pi_2 \rightarrow \pi^*$ | 5.23           |
| S <sub>4</sub> | $\pi_1 \rightarrow \pi^*$ | 6.70           |

**Table S19:** Electronic structure at the ground state optimised geometry. GS stands for the ground state electronic structure:  $(\pi_1)^2(\pi_2)^2(n_1)^2(n_2)^2(\pi^*)^0$ . Molecular orbitals are shown in figure S5.

| $S_{n_2}^{\text{MIN}}$ |                           |                        | $S_{n_1}^{\text{MIN}}$ |                           |                        |
|------------------------|---------------------------|------------------------|------------------------|---------------------------|------------------------|
| State                  | Nature                    | $\Delta E / \text{eV}$ | State                  | Nature                    | $\Delta E / \text{eV}$ |
| S <sub>0</sub>         | GS                        | 0.27                   | S <sub>0</sub>         | GS                        | 0.37                   |
| S <sub>1</sub>         | $n_2 \rightarrow \pi^*$   | 3.76                   | S <sub>1</sub>         | $n_2 \rightarrow \pi^*$   | 3.89                   |
| S <sub>2</sub>         | $n_1 \rightarrow \pi^*$   | 4.55                   | S <sub>2</sub>         | $n_1 \rightarrow \pi^*$   | 4.44                   |
| S <sub>3</sub>         | $\pi_2 \rightarrow \pi^*$ | 4.79                   | S <sub>3</sub>         | $\pi_2 \rightarrow \pi^*$ | 5.03                   |
| S <sub>4</sub>         | $\pi_1 \rightarrow \pi^*$ | 6.42                   | S <sub>4</sub>         | $\pi_1 \rightarrow \pi^*$ | 6.36                   |

  

| $S_{\pi_2}^{\text{MIN}}$ |                           |                        | $S_{\pi_1}^{\text{MIN}}$ |                           |                        |
|--------------------------|---------------------------|------------------------|--------------------------|---------------------------|------------------------|
| State                    | Nature                    | $\Delta E / \text{eV}$ | State                    | Nature                    | $\Delta E / \text{eV}$ |
| S <sub>0</sub>           | GS                        | 0.74                   | S <sub>0</sub>           | GS                        | 0.36                   |
| S <sub>1</sub>           | $n_2 \rightarrow \pi^*$   | 3.95                   | S <sub>1</sub>           | $n_2 \rightarrow \pi^*$   | 3.88                   |
| S <sub>2</sub>           | $\pi_2 \rightarrow \pi^*$ | 4.45                   | S <sub>2</sub>           | $n_1 \rightarrow \pi^*$   | 4.50                   |
| S <sub>3</sub>           | $n_1 \rightarrow \pi^*$   | 4.93                   | S <sub>3</sub>           | $\pi_1 \rightarrow \pi^*$ | 4.46                   |
| S <sub>4</sub>           | $\pi_1 \rightarrow \pi^*$ | 6.65                   | S <sub>4</sub>           | $\pi_2 \rightarrow \pi^*$ | 6.30                   |

**Table S20:** Electronic structure at the excited states optimised geometries. GS stands for the ground state electronic structure:  $(\pi_1)^2(\pi_2)^2(n_1)^2(n_2)^2(\pi^*)^0$ . Molecular orbitals are shown in figure S5.

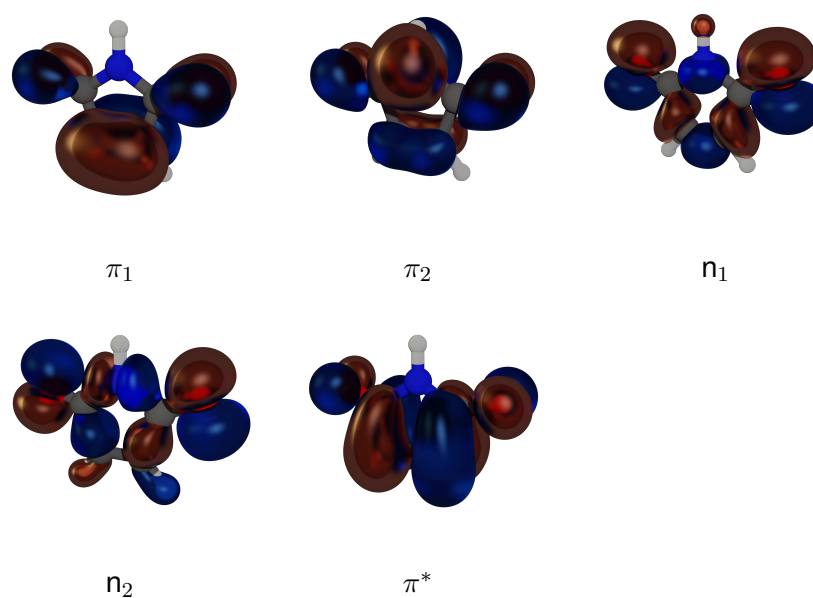

**Figure S5:** Orbitals involved in the four lowest excited singlet states of **Maleimide**.



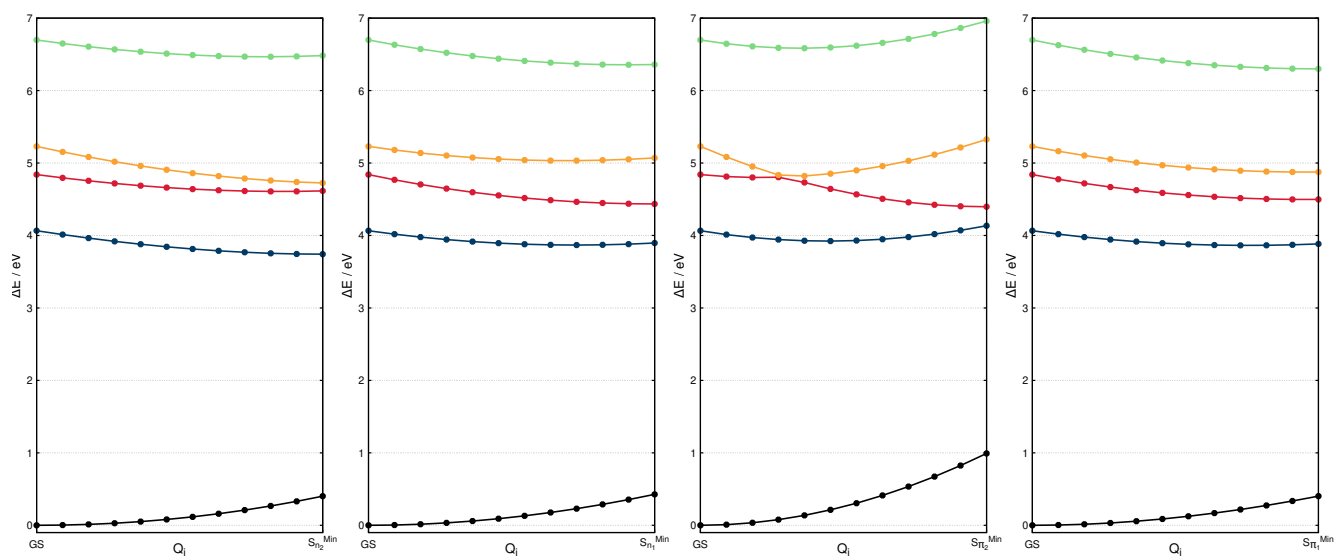

**Figure S6:** EOM-CCSD Path between Franck-Condon and the minimum of each of the four lowest excited states.

## S3-3 LVC parameters

Table S21: LVC Analysis for S1 of Maleimide.

| $\alpha$ | Freq. /cm <sup>-1</sup> | $\kappa_{\alpha}$       |          |        | $\kappa_{\alpha}^*$     |          |        | $\xi$  |
|----------|-------------------------|-------------------------|----------|--------|-------------------------|----------|--------|--------|
|          |                         | $\kappa_{\alpha}$ / meV | dE / meV | dQ     | $\kappa_{\alpha}$ / meV | dE / meV | dQ     |        |
| 1        | 112.79                  | 0.014                   | 0.000    | -0.001 | 0.067                   | 0.000    | -0.005 | -0.001 |
| 2        | 288.75                  | 0.066                   | 0.000    | -0.002 | -0.076                  | 0.000    | 0.002  | 0.002  |
| 3        | 396.51                  | 44.668                  | -0.746   | -0.909 | 76.328                  | -2.178   | -1.553 | -0.362 |
| 4        | 498.39                  | -0.009                  | 0.000    | 0.000  | 0.419                   | 0.000    | -0.007 | -0.005 |
| 5        | 540.97                  | -0.006                  | 0.000    | 0.000  | 0.074                   | 0.000    | -0.001 | -0.001 |
| 6        | 638.81                  | -0.153                  | 0.000    | 0.002  | 2.283                   | -0.001   | -0.029 | -0.028 |
| 7        | 641.93                  | 29.268                  | -0.198   | -0.368 | 15.163                  | -0.053   | -0.191 | 0.161  |
| 8        | 679.27                  | -0.018                  | 0.000    | 0.000  | 0.103                   | 0.000    | -0.001 | -0.001 |
| 9        | 778.30                  | 0.181                   | 0.000    | -0.002 | -0.271                  | 0.000    | 0.003  | 0.005  |
| 10       | 848.65                  | -0.085                  | 0.000    | 0.001  | 1.597                   | 0.000    | -0.015 | -0.019 |
| 11       | 922.62                  | -68.779                 | -0.760   | 0.601  | -72.741                 | -0.850   | 0.636  | 0.045  |
| 12       | 931.40                  | 0.002                   | 0.000    | 0.000  | 0.077                   | 0.000    | -0.001 | -0.001 |
| 13       | 958.55                  | -0.052                  | 0.000    | 0.000  | -1.609                  | 0.000    | 0.014  | 0.018  |
| 14       | 1070.20                 | -46.143                 | -0.295   | 0.348  | -33.550                 | -0.156   | 0.253  | -0.144 |
| 15       | 1168.61                 | -0.011                  | 0.000    | 0.000  | -0.190                  | 0.000    | 0.001  | 0.002  |
| 16       | 1344.99                 | 0.023                   | 0.000    | 0.000  | 0.177                   | 0.000    | -0.001 | -0.002 |
| 17       | 1367.17                 | -0.078                  | 0.000    | 0.000  | -0.084                  | 0.000    | 0.000  | 0.000  |
| 18       | 1387.29                 | 171.623                 | -3.147   | -0.998 | 243.160                 | -6.316   | -1.414 | -0.817 |
| 19       | 1663.40                 | -49.647                 | -0.220   | 0.241  | -81.986                 | -0.599   | 0.398  | 0.369  |
| 20       | 1870.47                 | 0.012                   | 0.000    | 0.000  | -0.458                  | 0.000    | 0.002  | 0.005  |
| 21       | 1907.74                 | -228.863                | -4.069   | 0.968  | -219.644                | -3.748   | 0.929  | -0.105 |
| 22       | 3265.71                 | 0.008                   | 0.000    | 0.000  | -0.067                  | 0.000    | 0.000  | 0.001  |
| 23       | 3288.38                 | 11.883                  | -0.006   | -0.029 | 13.503                  | -0.008   | -0.033 | -0.018 |
| 24       | 3692.77                 | -5.709                  | -0.001   | 0.012  | -0.222                  | 0.000    | 0.000  | -0.063 |

Table S22: LVC Analysis for S2 of Maleimide.

| $\alpha$ | Freq. /cm <sup>-1</sup> | $\kappa_{\alpha}$       |          |        | $\kappa_{\alpha}^*$     |          |        | $\xi$  |
|----------|-------------------------|-------------------------|----------|--------|-------------------------|----------|--------|--------|
|          |                         | $\kappa_{\alpha}$ / meV | dE / meV | dQ     | $\kappa_{\alpha}$ / meV | dE / meV | dQ     |        |
| 1        | 112.79                  | -0.016                  | 0.000    | 0.001  | -0.032                  | 0.000    | 0.002  | 0.000  |
| 2        | 288.75                  | 0.049                   | 0.000    | -0.001 | -0.022                  | 0.000    | 0.001  | 0.001  |
| 3        | 396.51                  | -22.843                 | -0.195   | 0.465  | -17.500                 | -0.114   | 0.356  | -0.102 |
| 4        | 498.39                  | -0.032                  | 0.000    | 0.001  | -0.020                  | 0.000    | 0.000  | 0.000  |
| 5        | 540.97                  | -0.007                  | 0.000    | 0.000  | -0.010                  | 0.000    | 0.000  | 0.000  |
| 6        | 638.81                  | -0.160                  | 0.000    | 0.002  | -0.086                  | 0.000    | 0.001  | -0.001 |
| 7        | 641.93                  | 33.574                  | -0.260   | -0.422 | 35.347                  | -0.288   | -0.444 | -0.034 |
| 8        | 679.27                  | -0.014                  | 0.000    | 0.000  | -0.012                  | 0.000    | 0.000  | 0.000  |
| 9        | 778.30                  | 0.201                   | 0.000    | -0.002 | 0.286                   | 0.000    | -0.003 | -0.002 |
| 10       | 848.65                  | -0.077                  | 0.000    | 0.001  | -0.077                  | 0.000    | 0.001  | 0.000  |
| 11       | 922.62                  | -89.165                 | -1.277   | 0.779  | -74.511                 | -0.892   | 0.651  | -0.279 |

Continued on next page

— Continued from previous page

| $\alpha$ | Freq. /cm <sup>-1</sup> | $\kappa_\alpha$ / meV | dE / meV | dQ     | $\kappa_\alpha$ / meV | dE / meV | dQ     | $\xi$  |
|----------|-------------------------|-----------------------|----------|--------|-----------------------|----------|--------|--------|
| 12       | 931.40                  | 0.005                 | 0.000    | 0.000  | 0.004                 | 0.000    | 0.000  | 0.000  |
| 13       | 958.55                  | -0.027                | 0.000    | 0.000  | -0.028                | 0.000    | 0.000  | 0.000  |
| 14       | 1070.20                 | -37.682               | -0.197   | 0.284  | -42.193               | -0.247   | 0.318  | 0.086  |
| 15       | 1168.61                 | -0.009                | 0.000    | 0.000  | -0.012                | 0.000    | 0.000  | 0.000  |
| 16       | 1344.99                 | 0.027                 | 0.000    | 0.000  | 0.020                 | 0.000    | 0.000  | 0.000  |
| 17       | 1367.17                 | -0.025                | 0.000    | 0.000  | -0.027                | 0.000    | 0.000  | 0.000  |
| 18       | 1387.29                 | 69.308                | -0.513   | -0.403 | 72.635                | -0.564   | -0.422 | -0.063 |
| 19       | 1663.40                 | -130.588              | -1.519   | 0.633  | -136.437              | -1.659   | 0.662  | 0.111  |
| 20       | 1870.47                 | 0.021                 | 0.000    | 0.000  | 0.035                 | 0.000    | 0.000  | 0.000  |
| 21       | 1907.74                 | -359.289              | -10.028  | 1.519  | -408.708              | -12.977  | 1.728  | 0.941  |
| 22       | 3265.71                 | 0.004                 | 0.000    | 0.000  | 0.002                 | 0.000    | 0.000  | 0.000  |
| 23       | 3288.38                 | 13.468                | -0.008   | -0.033 | 15.534                | -0.011   | -0.038 | -0.039 |
| 24       | 3692.77                 | 7.223                 | -0.002   | -0.016 | 5.819                 | -0.001   | -0.013 | 0.027  |

**Table S23:** LVC Analysis for S3 of Maleimide.

| $\alpha$ | Freq. /cm <sup>-1</sup> | $\kappa_\alpha$       |          |        | $\kappa_\alpha^*$     |          |        | $\xi$  |
|----------|-------------------------|-----------------------|----------|--------|-----------------------|----------|--------|--------|
|          |                         | $\kappa_\alpha$ / meV | dE / meV | dQ     | $\kappa_\alpha$ / meV | dE / meV | dQ     |        |
| 1        | 112.79                  | 0.115                 | 0.000    | -0.008 | 0.007                 | 0.000    | 0.000  | 0.001  |
| 2        | 288.75                  | 0.035                 | 0.000    | -0.001 | -0.031                | 0.000    | 0.001  | 0.000  |
| 3        | 396.51                  | 52.225                | -1.019   | -1.062 | 37.456                | -0.524   | -0.762 | 0.070  |
| 4        | 498.39                  | 0.164                 | 0.000    | -0.003 | 0.003                 | 0.000    | 0.000  | 0.001  |
| 5        | 540.97                  | -0.007                | 0.000    | 0.000  | -0.009                | 0.000    | 0.000  | 0.000  |
| 6        | 638.81                  | -0.221                | 0.000    | 0.003  | -0.019                | 0.000    | 0.000  | -0.001 |
| 7        | 641.93                  | 162.755               | -6.115   | -2.045 | 191.876               | -8.500   | -2.411 | -0.138 |
| 8        | 679.27                  | -0.030                | 0.000    | 0.000  | -0.032                | 0.000    | 0.000  | 0.000  |
| 9        | 778.30                  | 0.169                 | 0.000    | -0.002 | 1.539                 | 0.000    | -0.016 | -0.007 |
| 10       | 848.65                  | -0.096                | 0.000    | 0.001  | 0.052                 | 0.000    | 0.000  | -0.001 |
| 11       | 922.62                  | -127.267              | -2.602   | 1.113  | -91.200               | -1.336   | 0.797  | -0.171 |
| 12       | 931.40                  | 0.005                 | 0.000    | 0.000  | -0.004                | 0.000    | 0.000  | 0.000  |
| 13       | 958.55                  | -0.034                | 0.000    | 0.000  | 0.187                 | 0.000    | -0.002 | -0.001 |
| 14       | 1070.20                 | -47.579               | -0.313   | 0.359  | -31.831               | -0.140   | 0.240  | -0.075 |
| 15       | 1168.61                 | -0.007                | 0.000    | 0.000  | -0.010                | 0.000    | 0.000  | 0.000  |
| 16       | 1344.99                 | 0.036                 | 0.000    | 0.000  | 0.049                 | 0.000    | 0.000  | 0.000  |
| 17       | 1367.17                 | -0.201                | 0.000    | 0.001  | -0.281                | 0.000    | 0.002  | 0.000  |
| 18       | 1387.29                 | 351.904               | -13.229  | -2.046 | 486.258               | -25.259  | -2.827 | -0.638 |
| 19       | 1663.40                 | -169.241              | -2.552   | 0.821  | -196.667              | -3.446   | 0.954  | 0.130  |
| 20       | 1870.47                 | 0.000                 | 0.000    | 0.000  | -0.067                | 0.000    | 0.000  | 0.000  |
| 21       | 1907.74                 | -99.559               | -0.770   | 0.421  | 51.194                | -0.204   | -0.216 | -0.716 |
| 22       | 3265.71                 | 0.005                 | 0.000    | 0.000  | 0.020                 | 0.000    | 0.000  | 0.000  |
| 23       | 3288.38                 | 13.292                | -0.008   | -0.033 | 28.114                | -0.036   | -0.069 | -0.070 |
| 24       | 3692.77                 | -43.547               | -0.076   | 0.095  | -41.051               | -0.068   | 0.090  | -0.012 |

**Table S24:** LVC Analysis for S4 of Maleimide.

| $\alpha$ | Freq. /cm <sup>-1</sup> | $\kappa_{\alpha}$       |          |        | $\kappa_{\alpha}^*$     |          |        | $\xi$  |
|----------|-------------------------|-------------------------|----------|--------|-------------------------|----------|--------|--------|
|          |                         | $\kappa_{\alpha}$ / meV | dE / meV | dQ     | $\kappa_{\alpha}$ / meV | dE / meV | dQ     |        |
| 1        | 112.79                  | 0.035                   | 0.000    | -0.003 | 0.007                   | 0.000    | 0.000  | 0.001  |
| 2        | 288.75                  | 0.021                   | 0.000    | -0.001 | 0.002                   | 0.000    | 0.000  | 0.001  |
| 3        | 396.51                  | 7.174                   | -0.019   | -0.146 | 16.914                  | -0.107   | -0.344 | -0.267 |
| 4        | 498.39                  | 0.022                   | 0.000    | 0.000  | 0.029                   | 0.000    | 0.000  | 0.000  |
| 5        | 540.97                  | -0.005                  | 0.000    | 0.000  | -0.008                  | 0.000    | 0.000  | 0.000  |
| 6        | 638.81                  | -0.197                  | 0.000    | 0.002  | -0.071                  | 0.000    | 0.001  | -0.003 |
| 7        | 641.93                  | 69.043                  | -1.101   | -0.867 | 66.421                  | -1.019   | -0.835 | 0.072  |
| 8        | 679.27                  | -0.018                  | 0.000    | 0.000  | -0.017                  | 0.000    | 0.000  | 0.000  |
| 9        | 778.30                  | 0.124                   | 0.000    | -0.001 | 0.364                   | 0.000    | -0.004 | -0.007 |
| 10       | 848.65                  | -0.096                  | 0.000    | 0.001  | -0.040                  | 0.000    | 0.000  | -0.002 |
| 11       | 922.62                  | -64.619                 | -0.671   | 0.565  | -53.773                 | -0.464   | 0.470  | -0.297 |
| 12       | 931.40                  | 0.000                   | 0.000    | 0.000  | 0.002                   | 0.000    | 0.000  | 0.000  |
| 13       | 958.55                  | -0.171                  | 0.000    | 0.001  | -0.041                  | 0.000    | 0.000  | -0.004 |
| 14       | 1070.20                 | -78.423                 | -0.852   | 0.591  | -85.513                 | -1.013   | 0.644  | 0.194  |
| 15       | 1168.61                 | -0.001                  | 0.000    | 0.000  | -0.009                  | 0.000    | 0.000  | 0.000  |
| 16       | 1344.99                 | 0.015                   | 0.000    | 0.000  | 0.020                   | 0.000    | 0.000  | 0.000  |
| 17       | 1367.17                 | -0.042                  | 0.000    | 0.000  | -0.044                  | 0.000    | 0.000  | 0.000  |
| 18       | 1387.29                 | 91.931                  | -0.903   | -0.534 | 96.808                  | -1.001   | -0.563 | -0.134 |
| 19       | 1663.40                 | -229.182                | -4.680   | 1.111  | -242.490                | -5.239   | 1.176  | 0.365  |
| 20       | 1870.47                 | 0.035                   | 0.000    | 0.000  | 0.031                   | 0.000    | 0.000  | 0.000  |
| 21       | 1907.74                 | -278.474                | -6.024   | 1.177  | -307.323                | -7.337   | 1.299  | 0.790  |
| 22       | 3265.71                 | 0.008                   | 0.000    | 0.000  | 0.007                   | 0.000    | 0.000  | 0.000  |
| 23       | 3288.38                 | 27.002                  | -0.033   | -0.066 | 31.775                  | -0.046   | -0.078 | -0.131 |
| 24       | 3692.77                 | -10.163                 | -0.004   | 0.022  | -7.659                  | -0.002   | 0.017  | -0.069 |

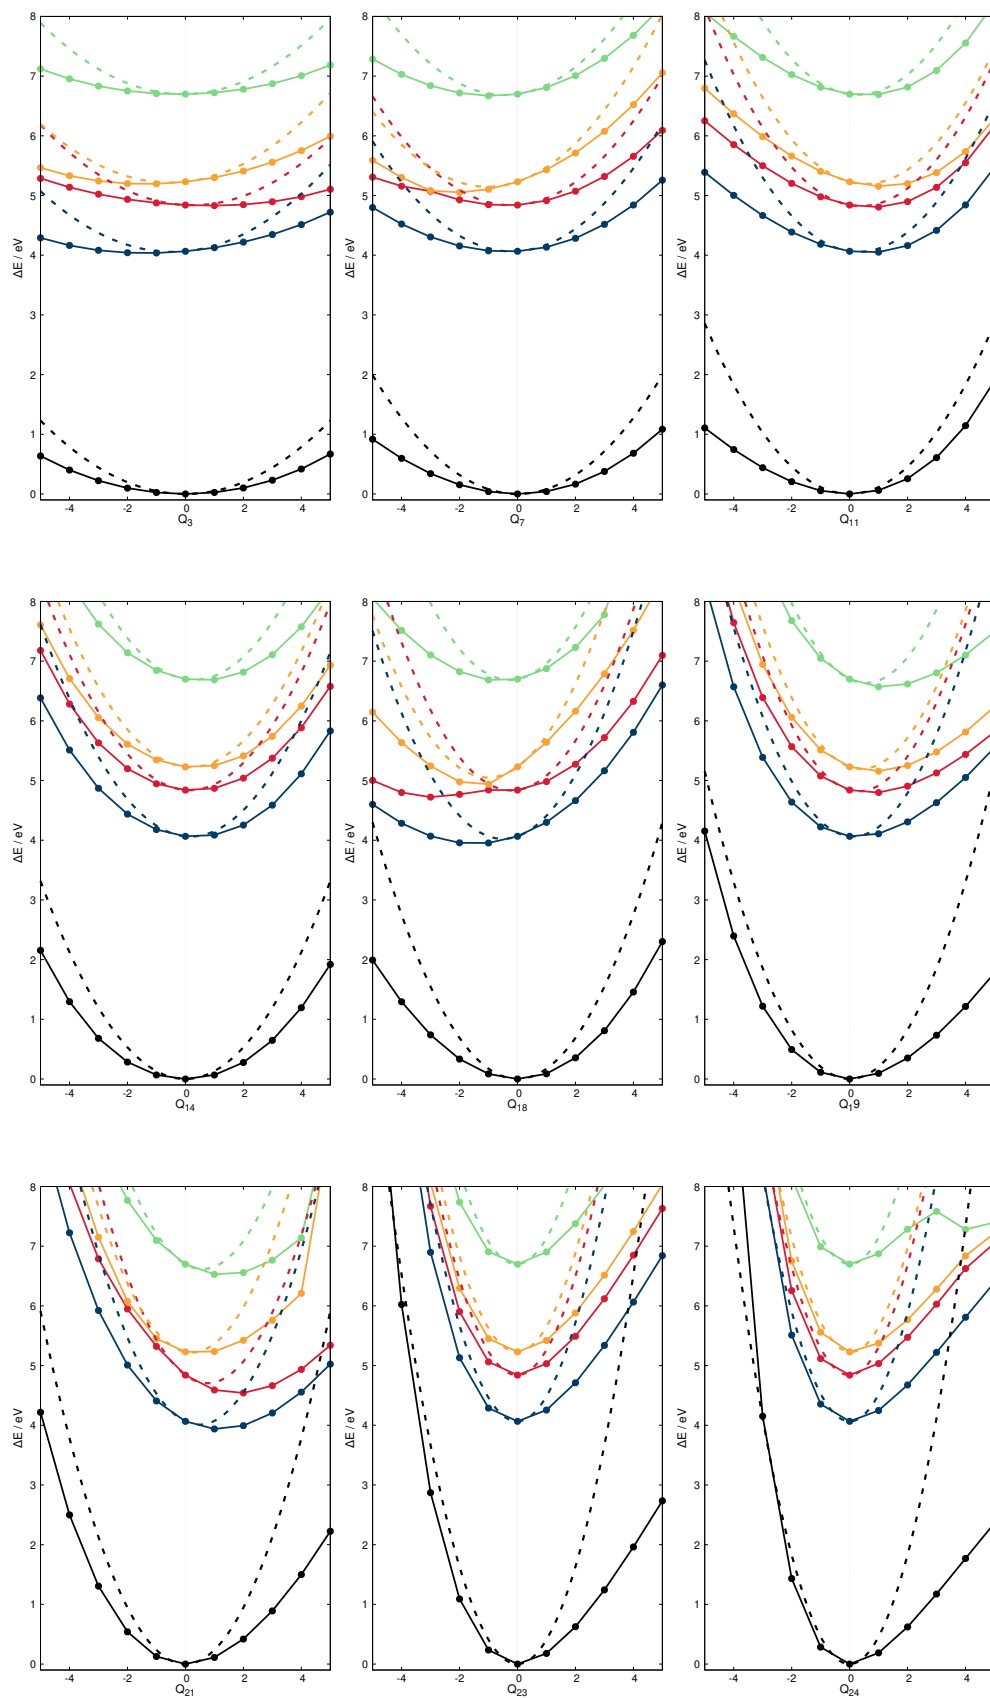

**Figure S7:** Comparison between the computed adiabatic (full lines) and LVC diabatic (dashed lines) PES along  $a_1$  normal modes.

### S3-4 Excited-states Dynamics

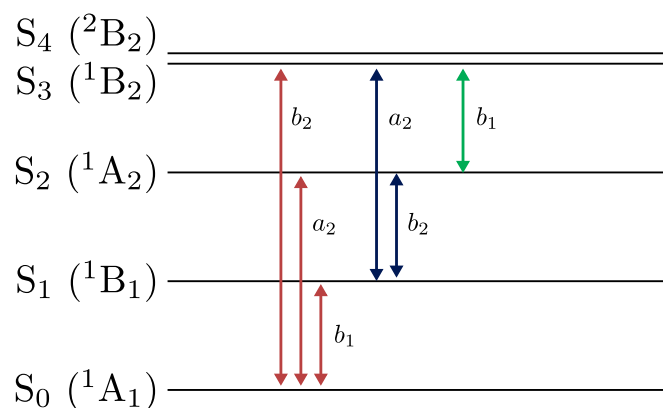

**Figure S8:** Schematic representation of the coupling selection rules at the  $C_{2v}$  ground state minimum of **Maleimide**. Arrows represent possible vibronic coupling and lowercase irreps correspond to the irreps of the normal modes that enable the coupling.

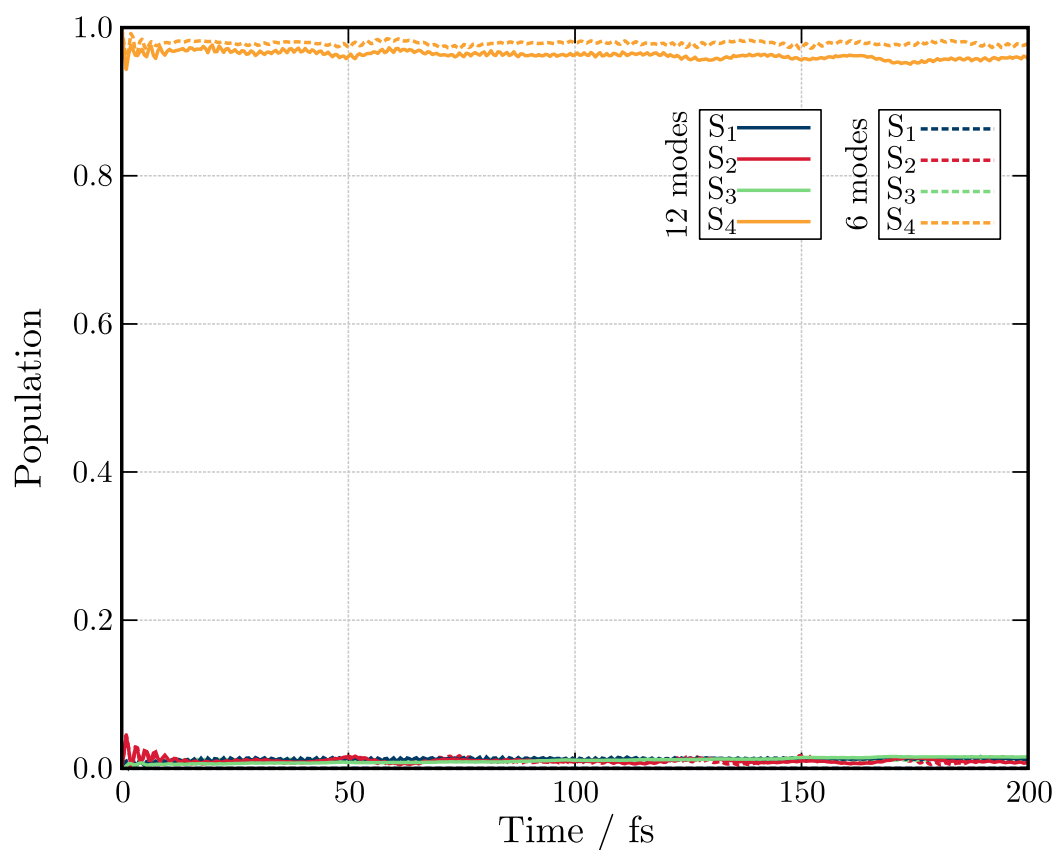

**Figure S9:** Population kinetics of the lowest excited singlet states of **Maleimide** using a model Hamiltonian along 12 (full lines) and 6 (dashed lines) normal modes. The initial wavepacket is position at  $Q_0$  in  $S_4$ .

### S3-4.1 6-modes Hamiltonian parameters

| $Q_\alpha$           | $\omega_\alpha$ | $K_\alpha^{S_1}$ | $K_\alpha^{S_2}$ | $K_\alpha^{S_3}$ | $K_\alpha^{S_4}$ |
|----------------------|-----------------|------------------|------------------|------------------|------------------|
| 7 (a <sub>1</sub> )  | 641.9           | 0.029            | 0.034            | 0.163            | 0.069            |
| 11 (a <sub>1</sub> ) | 922.6           | -0.069           | -0.089           | -0.127           | -0.065           |
| 18 (a <sub>1</sub> ) | 1387.3          | 0.172            | 0.069            | 0.352            | 0.092            |
| 19 (a <sub>1</sub> ) | 1663.4          | -0.050           | -0.131           | -0.169           | -0.229           |

**Table S25:** Intrastate coupling parameters for the 6-modes model Hamiltonian. Frequencies are given in  $\text{cm}^{-1}$  and couplings in eV.

| $Q_\alpha$          | $\omega_\alpha$ | $\lambda_\alpha^{S_0/S_1}$ | $\lambda_\alpha^{S_2/S_3}$ | $\lambda_\alpha^{S_2/S_4}$ |
|---------------------|-----------------|----------------------------|----------------------------|----------------------------|
| 1 (b <sub>1</sub> ) | 112.8           | -0.167                     | 0.117                      | 0.216                      |
| 4 (b <sub>1</sub> ) | 498.4           | -0.151                     | 0.092                      | 0.208                      |

**Table S26:** Intrastate coupling parameters for the 6-modes model Hamiltonian. Frequencies are given in  $\text{cm}^{-1}$  and couplings in eV.

| Modes                        | Primitive basis | SPF basis       |
|------------------------------|-----------------|-----------------|
| Initial wavepacket in $1B_2$ |                 |                 |
| ( m7 m18 )                   | ( 21 31 )       | ( 2 2 35 32 5 ) |
| ( m1 m11 )                   | ( 16 16 )       | ( 2 2 35 32 5 ) |
| ( m4 m19 )                   | ( 16 16 )       | ( 2 2 18 18 4 ) |
| Initial wavepacket in $2B_2$ |                 |                 |
| ( m7 m18 )                   | ( 21 31 )       | ( 2 2 2 12 7 )  |
| ( m1 m11 )                   | ( 16 16 )       | ( 2 2 2 11 7 )  |
| ( m4 m19 )                   | ( 16 16 )       | ( 2 2 2 11 7 )  |

**Table S27:** Computational details of the 6-modes MCTDH propagations with wavepackets with an initial wavepacket in  $1B_2$  or  $2B_2$ . The number of primitive basis and Single Particule Functions are given for each set of combined modes.

### S3-4.2 12-modes Hamiltonian parameters



| $Q_\alpha$           | $\omega_\alpha$ | $\kappa_\alpha^{S_1}$ | $\kappa_\alpha^{S_2}$ | $\kappa_\alpha^{S_3}$ | $\kappa_\alpha^{S_4}$ |
|----------------------|-----------------|-----------------------|-----------------------|-----------------------|-----------------------|
| 3 (a <sub>1</sub> )  | 396.5           | 0.045                 | -0.023                | 0.052                 | 0.007                 |
| 7 (a <sub>1</sub> )  | 641.9           | 0.029                 | 0.034                 | 0.163                 | 0.069                 |
| 11 (a <sub>1</sub> ) | 922.6           | -0.069                | -0.089                | -0.127                | -0.065                |
| 18 (a <sub>1</sub> ) | 1387.3          | 0.172                 | 0.069                 | 0.352                 | 0.092                 |
| 19 (a <sub>1</sub> ) | 1663.4          | -0.050                | -0.131                | -0.169                | -0.229                |
| 21 (a <sub>1</sub> ) | 1907.7          | -0.229                | -0.359                | -0.100                | -0.278                |

**Table S28:** Intrastate coupling parameters for the 12-modes model Hamiltonian. Frequencies are given in  $\text{cm}^{-1}$  and couplings in eV.

| $Q_\alpha$           | $\omega_\alpha$ | $\lambda_\alpha^{S_0/S_1}$ | $\lambda_\alpha^{S_0/S_2}$ | $\lambda_\alpha^{S_0/S_3}$ | $\lambda_\alpha^{S_0/S_4}$ | $\lambda_\alpha^{S_1/S_2}$ |
|----------------------|-----------------|----------------------------|----------------------------|----------------------------|----------------------------|----------------------------|
| 1 (b <sub>1</sub> )  | 112.8           | -0.167                     | 0.000                      | 0.000                      | 0.000                      | 0.000                      |
| 2 (a <sub>2</sub> )  | 288.9           | 0.000                      | -0.217                     | 0.000                      | 0.000                      | 0.000                      |
| 4 (b <sub>1</sub> )  | 498.4           | -0.151                     | 0.000                      | 0.000                      | 0.000                      | 0.000                      |
| 9 (a <sub>2</sub> )  | 778.6           | 0.000                      | -0.221                     | 0.000                      | 0.000                      | 0.000                      |
| 13 (a <sub>2</sub> ) | 958.7           | 0.000                      | -0.186                     | 0.000                      | 0.000                      | 0.000                      |
| 20 (b <sub>2</sub> ) | 1871.1          | 0.000                      | 0.000                      | -0.332                     | -0.375                     | 0.128                      |

  

| $Q_\alpha$           | $\omega_\alpha$ | $\lambda_\alpha^{S_1/S_3}$ | $\lambda_\alpha^{S_1/S_4}$ | $\lambda_\alpha^{S_2/S_3}$ | $\lambda_\alpha^{S_2/S_4}$ |
|----------------------|-----------------|----------------------------|----------------------------|----------------------------|----------------------------|
| 1 (b <sub>1</sub> )  | 112.8           | 0.000                      | 0.000                      | 0.117                      | 0.216                      |
| 2 (a <sub>2</sub> )  | 288.9           | -0.038                     | -0.049                     | 0.000                      | 0.000                      |
| 4 (b <sub>1</sub> )  | 498.4           | 0.000                      | 0.000                      | 0.092                      | 0.208                      |
| 9 (a <sub>2</sub> )  | 778.6           | 0.019                      | -0.071                     | 0.000                      | 0.000                      |
| 13 (a <sub>2</sub> ) | 958.7           | 0.119                      | 0.180                      | 0.000                      | 0.000                      |
| 20 (b <sub>2</sub> ) | 1871.1          | 0.000                      | 0.000                      | 0.000                      | 0.000                      |

**Table S29:** Intrastate coupling parameters for the 12-modes model Hamiltonian. Frequencies are given in  $\text{cm}^{-1}$  and couplings in eV.

| Modes                           | Primitive basis | SPF basis        |
|---------------------------------|-----------------|------------------|
| Initial wavepacket in ${}^1B_2$ |                 |                  |
| ( m3 m4 m7 m11 )                | ( 21 16 21 16 ) | ( 2 22 19 22 5 ) |
| ( m1 m9 m13 m18 )               | ( 16 21 11 31 ) | ( 2 26 22 22 7 ) |
| ( m2 m19 m20 m21 )              | ( 11 16 11 16 ) | ( 2 20 15 15 4 ) |
| Initial wavepacket in ${}^2B_2$ |                 |                  |
| ( m3 m4 m7 m11 )                | ( 21 16 21 16 ) | ( 2 6 4 13 5 )   |
| ( m1 m9 m13 m18 )               | ( 16 21 11 31 ) | ( 2 9 4 14 9 )   |
| ( m2 m19 m20 m21 )              | ( 11 16 11 16 ) | ( 2 9 3 13 8 )   |

**Table S30:** Computational details of the 12-modes MCTDH propagations with wavepackets with an initial wavepacket in  ${}^1B_2$  or  ${}^2B_2$ . The number of primitive basis and Single Particle Functions are given for each set of combined modes.
